# Supplementary material for: Machine learning integrates region-specific microbial signatures to distinguish geographically adjacent populations within a province
Source: Front Microbiol. 2025 Jul 11;16:1586195. doi: 10.3389/fmicb.2025.1586195 (PMC12289627; doi:10.3389/fmicb.2025.1586195)
Supplement: Supplementary file 2 [file Data_Sheet_2.xlsx]

## Sheet: Table S1
Table S1. Summary statistics of microbiome data (taxa)
	Taxonomic_level	Mean	SD	Min	Max	Core microbe
Methanobrevibacter_smithii	s	1.53365e-05	0.000133317	0	0.0018882
Methanosphaera_stadtmanae	s	1.07349e-06	1.35491e-05	0	0.0002429
Actinobaculum_sp_oral_taxon_183	s	1.35171e-07	1.4087e-06	0	1.89e-05
Actinomyces_graevenitzii	s	3.48688e-06	1.23565e-05	0	9.43e-05
Actinomyces_odontolyticus	s	1.9811e-06	7.84914e-06	0	8.09e-05
Actinomyces_oris	s	5.98425e-08	6.47782e-07	0	7.9e-06
Actinomyces_sp_HMSC035G02	s	4.9895e-07	2.84682e-06	0	3.5e-05
Actinomyces_sp_ICM47	s	2.20415e-05	5.2849e-05	0	0.0004294
Actinomyces_sp_S6_Spd3	s	1.1811e-06	5.84817e-06	0	8.47e-05
Actinomyces_sp_oral_taxon_181	s	1.82073e-06	1.05918e-05	0	0.0001415
Actinomyces_sp_oral_taxon_414	s	3.51706e-08	6.85601e-07	0	1.34e-05
Actinomyces_sp_oral_taxon_448	s	2.65092e-08	4.54959e-07	0	8.8e-06
Actinomyces_turicensis	s	1.34585e-05	0.000215265	0	0.0041211
Varibaculum_cambriense	s	3.24777e-06	4.54275e-05	0	0.0007442
Aeriscardovia_aeriphila	s	3.22835e-08	4.45134e-07	0	6.5e-06
Alloscardovia_omnicolens	s	8.35958e-07	9.59967e-06	0	0.0001384
Bifidobacterium_adolescentis	s	0.00152888	0.0119263	0	0.223948
Bifidobacterium_animalis	s	1.32898e-05	0.000143178	0	0.0026229
Bifidobacterium_bifidum	s	0.000219642	0.000975972	0	0.0104797
Bifidobacterium_breve	s	1.78265e-05	0.000188102	0	0.0032764
Bifidobacterium_dentium	s	4.39155e-05	0.000295054	0	0.0042753
Bifidobacterium_longum	s	0.00127412	0.00316465	0	0.0384252
Bifidobacterium_pseudocatenulatum	s	0.002207	0.00487926	0	0.0522576
Gardnerella_vaginalis	s	2.40323e-05	0.000301501	0	0.0056365
Parascardovia_denticolens	s	5.30184e-08	1.03352e-06	0	2.02e-05
Scardovia_wiggsiae	s	2.66142e-06	4.1184e-05	0	0.0008017
Corynebacterium_argentoratense	s	2.32021e-07	3.75683e-06	0	7.15e-05
Corynebacterium_aurimucosum	s	2.62467e-09	5.11643e-08	0	1e-06
Corynebacterium_simulans	s	7.5853e-08	1.47865e-06	0	2.89e-05
Lawsonella_clevelandensis	s	3.79948e-06	7.28877e-05	0	0.0014245
Rothia_aeria	s	1.16955e-06	7.56771e-06	0	9.82e-05
Rothia_dentocariosa	s	2.34908e-07	2.41465e-06	0	3.89e-05
Rothia_mucilaginosa	s	4.64147e-05	0.000222937	0	0.0031367
Tropheryma_whipplei	s	1.07349e-07	1.4072e-06	0	2.26e-05
Propionibacterium_acidifaciens	s	2.55381e-07	2.66798e-06	0	4.35e-05
Atopobium_deltae	s	4.00394e-06	6.75155e-05	0	0.0013124
Atopobium_minutum	s	8.54829e-06	9.61507e-05	0	0.0016518
Atopobium_parvulum	s	6.3832e-07	3.8688e-06	0	4.82e-05
Atopobium_rimae	s	2e-07	1.88168e-06	0	2.3e-05
Atopobium_vaginae	s	3.50493e-05	0.00045942	0	0.0070415
Olsenella_scatoligenes	s	3.57428e-05	0.000273443	0	0.00408
Collinsella_aerofaciens	s	0.00147163	0.00245626	0	0.0210629
Collinsella_intestinalis	s	0.000115683	0.000595996	0	0.0084132
Collinsella_stercoris	s	2.8505e-05	8.11243e-05	0	0.0007353
Collinsella_massiliensis	s	4.09423e-06	1.09353e-05	0	0.000116
Enorma_massiliensis	s	2.3827e-05	0.000215916	0	0.0039007
Adlercreutzia_equolifaciens	s	0.000121848	0.000410322	0	0.0069531
Asaccharobacter_celatus	s	3.63787e-05	0.00011572	0	0.0019048
Eggerthella_lenta	s	0.000218719	0.000495612	0	0.0050878
Enterorhabdus_caecimuris	s	1.48163e-06	6.23077e-06	0	9.95e-05
Gordonibacter_pamelaeae	s	6.07087e-05	0.000107915	0	0.0008424
Slackia_isoflavoniconvertens	s	1.41488e-05	0.000158004	0	0.0028409
Bacteroides_caccae	s	0.00857269	0.0163281	0	0.115495
Bacteroides_cellulosilyticus	s	0.00309992	0.0134138	0	0.200545
Bacteroides_clarus	s	0.00154194	0.0067128	0	0.0703651
Bacteroides_coprocola	s	0.00965731	0.0292152	0	0.210759
Bacteroides_coprophilus	s	0.00137877	0.00891945	0	0.120871
Bacteroides_dorei	s	0.045831	0.101419	0	0.64244
Bacteroides_eggerthii	s	0.0087685	0.0289722	0	0.226506
Bacteroides_faecichinchillae	s	1.85564e-06	1.56563e-05	0	0.0002698
Bacteroides_faecis	s	0.00192862	0.0092922	0	0.10036
Bacteroides_faecis_CAG_32	s	0.000490988	0.00400666	0	0.055384
Bacteroides_finegoldii	s	0.00427933	0.0127954	0	0.0908065
Bacteroides_fragilis	s	0.0137453	0.0560433	0	0.703573
Bacteroides_galacturonicus	s	0.000239794	0.00169162	0	0.0189889
Bacteroides_intestinalis	s	0.00232733	0.00684625	0	0.0491066
Bacteroides_massiliensis	s	0.0066927	0.0156032	0	0.147906
Bacteroides_nordii	s	0.000118509	0.00047966	0	0.0055154
Bacteroides_oleiciplenus	s	3.85667e-05	0.000712185	0	0.013916
Bacteroides_ovatus	s	0.0154118	0.0283069	0	0.247752	Y
Bacteroides_plebeius	s	0.0468032	0.108905	0	0.562173
Bacteroides_salyersiae	s	0.00234077	0.00493178	0	0.0365283
Bacteroides_sartorii	s	0.000720611	0.0108693	0	0.205456
Bacteroides_sp_43_108	s	1.68344e-05	0.000262758	0	0.0049572
Bacteroides_sp_CAG_144	s	7.73858e-06	0.00012612	0	0.0024314
Bacteroides_sp_CAG_530	s	4.43291e-05	0.000722125	0	0.0137739
Bacteroides_sp_CAG_598	s	1.9884e-05	0.00038486	0	0.007522
Bacteroides_sp_D2	s	0.000172967	0.00173217	0	0.0245293
Bacteroides_sp_OM05_12	s	0.000253873	0.00216436	0	0.0367051
Bacteroides_sp_OM08_11	s	5.50971e-06	8.16146e-05	0	0.0015036
Bacteroides_stercorirosoris	s	4.9168e-06	4.87149e-05	0	0.0006876
Bacteroides_stercoris	s	0.0522922	0.0889674	0	0.508951
Bacteroides_thetaiotaomicron	s	0.0176718	0.0467059	0	0.766507	Y
Bacteroides_uniformis	s	0.0618571	0.0716904	0	0.456205	Y
Bacteroides_vulgatus	s	0.150149	0.14999	0	0.729845	Y
Bacteroides_xylanisolvens	s	0.00756026	0.0150875	0	0.152095
Barnesiella_intestinihominis	s	0.0021596	0.00552926	0	0.0480754
Coprobacter_fastidiosus	s	0.00125338	0.00639893	0	0.0765319
Coprobacter_secundus	s	0.000123836	0.00057563	0	0.0073625
Butyricimonas_synergistica	s	0.000270106	0.000729652	0	0.005565
Butyricimonas_virosa	s	0.00101616	0.00212697	0	0.0253164
Odoribacter_splanchnicus	s	0.00308696	0.00446288	0	0.0267995
Porphyromonas_asaccharolytica	s	6.56378e-06	7.24916e-05	0	0.0012203
Porphyromonas_endodontalis	s	1.27034e-07	2.15578e-06	0	4.16e-05
Porphyromonas_gingivalis	s	3.58714e-06	6.51847e-05	0	0.0012708
Porphyromonas_sp_HMSC065F10	s	1.24879e-05	0.000126823	0	0.0022425
Porphyromonas_uenonis	s	1.53152e-05	0.00015652	0	0.0020944
Sanguibacteroides_justesenii	s	2.47297e-06	2.131e-05	0	0.0003204
Paraprevotella_clara	s	0.000267839	0.00120944	0	0.0124025
Paraprevotella_xylaniphila	s	0.00121676	0.00479207	0	0.0603498
Prevotella_bivia	s	0.000305552	0.00346129	0	0.0536729
Prevotella_buccae	s	8.80919e-06	0.000119688	0	0.0021734
Prevotella_buccalis	s	2.52134e-05	0.00021477	0	0.002997
Prevotella_colorans	s	2.90079e-06	4.31865e-05	0	0.0008019
Prevotella_copri	s	0.0926153	0.216123	0	0.923863
Prevotella_corporis	s	0.000421082	0.00764131	0	0.14926
Prevotella_disiens	s	6.7537e-05	0.0006986	0	0.0131446
Prevotella_oralis	s	7.9685e-07	1.55335e-05	0	0.0003036
Prevotella_salivae	s	1.33071e-07	2.59403e-06	0	5.07e-05
Prevotella_sp_885	s	0.000306696	0.00460378	0	0.0838006
Prevotella_sp_AM42_24	s	0.00286877	0.029457	0	0.469245
Prevotella_sp_CAG_1031	s	0.000235754	0.00240045	0	0.0357819
Prevotella_sp_CAG_1185	s	1.34924e-05	0.000185835	0	0.0026544
Prevotella_sp_CAG_279	s	0.00172446	0.00935633	0	0.0996299
Prevotella_sp_CAG_485	s	8.84549e-05	0.00148787	0	0.0286517
Prevotella_sp_CAG_520	s	0.000197852	0.00385663	0	0.0753775
Prevotella_sp_CAG_5226	s	0.000865565	0.0066602	0	0.070462
Prevotella_sp_CAG_617	s	1.26745e-06	2.47072e-05	0	0.0004829
Prevotella_sp_CAG_891	s	0.000460032	0.0057768	0	0.0992914
Prevotella_sp_S7_1_8	s	5.50919e-07	7.87101e-06	0	0.0001468
Prevotella_stercorea	s	0.00550588	0.0289247	0	0.38191
Prevotella_timonensis	s	0.000112949	0.00159566	0	0.030267
Alistipes_finegoldii	s	0.00317668	0.0120368	0	0.174824
Alistipes_indistinctus	s	0.000352072	0.00119992	0	0.0139958
Alistipes_inops	s	0.000178865	0.00146437	0	0.0241133
Alistipes_onderdonkii	s	0.000735608	0.00667651	0	0.101192
Alistipes_putredinis	s	0.0193193	0.0307711	0	0.163624
Alistipes_shahii	s	0.00128187	0.00286418	0	0.0257314
Alistipes_timonensis	s	1.50567e-05	0.000178885	0	0.0032229
Parabacteroides_chinchillae	s	1.26299e-06	1.90785e-05	0	0.0003696
Parabacteroides_distasonis	s	0.0184371	0.0252086	0	0.260387	Y
Parabacteroides_goldsteinii	s	0.000456718	0.00158634	0	0.0148605
Parabacteroides_gordonii	s	9.05651e-05	0.00106172	0	0.0205656
Parabacteroides_johnsonii	s	0.000530164	0.00215353	0	0.0248653
Parabacteroides_merdae	s	0.00663792	0.0125119	0	0.148774
Parabacteroides_sp_426_9	s	1.44856e-06	1.74363e-05	0	0.000282
Parabacteroides_sp_CAG_409	s	2.74399e-05	0.000534902	0	0.0104546
Arthrospira_platensis	s	1.31234e-09	2.55821e-08	0	5e-07
Gemella_asaccharolytica	s	1.89239e-07	1.85924e-06	0	3.2e-05
Gemella_bergeri	s	5.43307e-08	6.42349e-07	0	9.9e-06
Gemella_haemolysans	s	8.22362e-06	2.5992e-05	0	0.0002202
Gemella_morbillorum	s	1.81181e-06	7.91877e-06	0	6.92e-05
Gemella_sanguinis	s	1.57898e-05	6.26628e-05	0	0.0010106
Staphylococcus_saprophyticus	s	1.83465e-07	3.57638e-06	0	6.99e-05
Staphylococcus_warneri	s	3.09711e-07	4.31413e-06	0	6.81e-05
Abiotrophia_defectiva	s	3.54068e-07	4.70611e-06	0	8.73e-05
Abiotrophia_sp_HMSC24B09	s	6.08661e-07	7.51092e-06	0	0.000131
Carnobacterium_divergens	s	2.81102e-07	5.47969e-06	0	0.0001071
Carnobacterium_maltaromaticum	s	1.89764e-07	3.69918e-06	0	7.23e-05
Granulicatella_adiacens	s	4.49081e-07	4.22137e-06	0	6.4e-05
Granulicatella_elegans	s	3.02546e-06	1.53086e-05	0	0.0002125
Enterococcus_asini	s	4.51102e-06	4.25805e-05	0	0.0006394
Enterococcus_avium	s	3.36509e-06	2.64992e-05	0	0.0002917
Enterococcus_casseliflavus	s	1.81567e-05	0.00021068	0	0.0037627
Enterococcus_cecorum	s	5.6168e-08	1.09492e-06	0	2.14e-05
Enterococcus_durans	s	1.00472e-06	1.766e-05	0	0.0003433
Enterococcus_faecalis	s	2.99115e-05	0.000341286	0	0.0057826
Enterococcus_faecium	s	1.61105e-05	0.000129117	0	0.0015201
Enterococcus_gallinarum	s	1.68118e-05	0.000280049	0	0.0054608
Enterococcus_hirae	s	5.66929e-08	9.89678e-07	0	1.92e-05
Enterococcus_raffinosus	s	3.89134e-06	7.58562e-05	0	0.0014826
Lactobacillus_acetotolerans	s	3.82152e-07	7.44952e-06	0	0.0001456
Lactobacillus_acidophilus	s	1.8231e-06	1.72775e-05	0	0.0002415
Lactobacillus_amylovorus	s	5.13911e-07	8.45867e-06	0	0.0001619
Lactobacillus_brevis	s	1.40446e-06	1.94761e-05	0	0.0003
Lactobacillus_crispatus	s	3.04987e-07	4.22555e-06	0	7.65e-05
Lactobacillus_delbrueckii	s	1.51732e-06	2.27182e-05	0	0.0004212
Lactobacillus_fermentum	s	4.98871e-06	5.4124e-05	0	0.000779
Lactobacillus_gasseri	s	2.71129e-07	3.31216e-06	0	5.72e-05
Lactobacillus_iners	s	0.000113441	0.00216163	0	0.042247
Lactobacillus_johnsonii	s	7.81409e-05	0.00152325	0	0.0297717
Lactobacillus_mucosae	s	1.42517e-05	0.000143512	0	0.0023522
Lactobacillus_paragasseri	s	6.55906e-07	6.10549e-06	0	8.84e-05
Lactobacillus_pentosus	s	8.08399e-08	1.57586e-06	0	3.08e-05
Lactobacillus_plantarum	s	6.82415e-07	6.54686e-06	0	9.21e-05
Lactobacillus_reuteri	s	1.74769e-05	0.000323299	0	0.0063153
Lactobacillus_rhamnosus	s	3.45144e-07	5.55593e-06	0	0.0001055
Lactobacillus_rogosae	s	0.000131285	0.000474652	0	0.0053197
Lactobacillus_ruminis	s	8.48333e-05	0.00107667	0	0.0202535
Lactobacillus_saerimneri	s	4.74278e-07	9.24538e-06	0	0.0001807
Lactobacillus_sakei	s	7.79528e-08	1.08055e-06	0	1.66e-05
Lactobacillus_salivarius	s	6.15696e-06	5.33659e-05	0	0.0009159
Lactobacillus_sanfranciscensis	s	2.91837e-06	3.55997e-05	0	0.0006592
Pediococcus_acidilactici	s	3.1063e-06	4.75694e-05	0	0.0008794
Sharpea_azabuensis	s	9.52756e-08	1.31839e-06	0	2e-05
Leuconostoc_citreum	s	5.63255e-07	5.86553e-06	0	7.76e-05
Leuconostoc_garlicum	s	1.10866e-06	9.13269e-06	0	0.0001148
Leuconostoc_gelidum	s	5.77428e-09	1.12561e-07	0	2.2e-06
Leuconostoc_lactis	s	7.97375e-07	7.44203e-06	0	9.88e-05
Leuconostoc_mesenteroides	s	1.36483e-08	2.66054e-07	0	5.2e-06
Leuconostoc_suionicum	s	1.44357e-08	2.81404e-07	0	5.5e-06
Weissella_cibaria	s	1.18215e-06	1.02105e-05	0	0.0001421
Weissella_confusa	s	8.73045e-06	4.84407e-05	0	0.0006918
Weissella_viridescens	s	2.03018e-06	3.2671e-05	0	0.0006277
Lactococcus_garvieae	s	8.40735e-06	0.000122438	0	0.0023669
Lactococcus_lactis	s	1.28415e-05	6.7999e-05	0	0.0007407
Lactococcus_petauri	s	1.46391e-05	0.000246075	0	0.0047972
Lactococcus_piscium	s	6.64042e-08	1.29446e-06	0	2.53e-05
Streptococcus_anginosus_group	s	4.43801e-05	0.000422217	0	0.0076794
Streptococcus_australis	s	1.36822e-05	7.31597e-05	0	0.0010386
Streptococcus_cristatus	s	3.00026e-06	1.59876e-05	0	0.000158
Streptococcus_gallolyticus	s	1.69291e-07	2.39619e-06	0	4.43e-05
Streptococcus_gordonii	s	8.05669e-06	4.00618e-05	0	0.0005428
Streptococcus_infantarius	s	3.28451e-06	3.36222e-05	0	0.0005102
Streptococcus_infantis	s	3.25331e-05	0.000144787	0	0.0017313
Streptococcus_lutetiensis	s	2.39163e-05	0.00031959	0	0.0059144
Streptococcus_macedonicus	s	5.03937e-08	8.50864e-07	0	1.64e-05
Streptococcus_milleri	s	3.07454e-06	4.80275e-05	0	0.0009328
Streptococcus_mitis	s	0.000139876	0.000423463	0	0.0054058
Streptococcus_mutans	s	2.23491e-06	1.87364e-05	0	0.0002912
Streptococcus_oralis	s	5.91325e-05	0.000317322	0	0.0045241
Streptococcus_parasanguinis	s	0.000309916	0.00177744	0	0.0263464
Streptococcus_pasteurianus	s	9.12496e-05	0.000688989	0	0.009354
Streptococcus_pseudopneumoniae	s	8.38583e-07	6.54696e-06	0	8.73e-05
Streptococcus_salivarius	s	0.000758866	0.00258737	0	0.0302578
Streptococcus_sanguinis	s	1.30367e-05	4.77817e-05	0	0.0004589
Streptococcus_sinensis	s	1.45144e-07	2.82938e-06	0	5.53e-05
Streptococcus_sp_A12	s	1.28399e-06	7.69454e-06	0	0.0001024
Streptococcus_sp_F0442	s	1.97769e-06	1.42055e-05	0	0.0002279
Streptococcus_sp_HMSC034E03	s	1.47769e-07	1.27344e-06	0	1.65e-05
Streptococcus_sp_HMSC067H01	s	7.18898e-07	6.65065e-06	0	0.0001123
Streptococcus_sp_HMSC070B10	s	1.11549e-07	1.37204e-06	0	2.04e-05
Streptococcus_sp_M334	s	4.25197e-07	3.77558e-06	0	5.03e-05
Streptococcus_sp_NLAE_zl_C503	s	2.77428e-07	2.38298e-06	0	2.5e-05
Streptococcus_sp_oral_taxon_058	s	3.81365e-07	3.81635e-06	0	5.43e-05
Streptococcus_thermophilus	s	0.000450099	0.00166024	0	0.0187689
Streptococcus_vestibularis	s	2.81987e-05	0.000205137	0	0.0033243
Streptococcus_viridans	s	7.55906e-08	8.91257e-07	0	1.23e-05
Catabacter_hongkongensis	s	1.06394e-05	9.11207e-05	0	0.0017247
Christensenella_minuta	s	8.45801e-06	3.20882e-05	0	0.0003453
Butyricicoccus_pullicaecorum	s	0.000118823	0.00113716	0	0.021071
Butyribacterium_methylotrophicum	s	9.37008e-08	1.11906e-06	0	1.95e-05
Clostridium_bolteae_CAG_59	s	0.000656325	0.00920279	0	0.17924
Clostridium_butyricum	s	0.000240149	0.00233455	0	0.033418
Clostridium_celatum	s	2.19396e-05	0.000384351	0	0.0074883
Clostridium_disporicum	s	0.000152499	0.00136615	0	0.0244852
Clostridium_neonatale	s	0.000121386	0.00188162	0	0.0353118
Clostridium_paraputrificum	s	0.000187307	0.00213774	0	0.0339783
Clostridium_perfringens	s	0.000186645	0.0016466	0	0.0283411
Clostridium_sp_7_2_43FAA	s	1.27811e-05	0.000245627	0	0.0048008
Clostridium_sp_CAG_167	s	1.5357e-06	2.2895e-05	0	0.0004273
Clostridium_sp_CAG_242	s	0.000206485	0.00129112	0	0.0219266
Clostridium_sp_CAG_253	s	7.51567e-05	0.00051456	0	0.0054224
Clostridium_sp_CAG_299	s	0.00098199	0.0036498	0	0.0332337
Clostridium_sp_CAG_58	s	0.000951156	0.00250619	0	0.0237594
Clostridium_sp_D5	s	3.7664e-07	4.11705e-06	0	5.63e-05
Clostridium_sp_chh4_2	s	2.66929e-06	2.33982e-05	0	0.0003542
Clostridium_ventriculi	s	7.28058e-06	0.000141925	0	0.0027739
Hungatella_hathewayi	s	0.000183916	0.000576543	0	0.0060767
Lactonifactor_longoviformis	s	3.70131e-06	3.41972e-05	0	0.0006372
Eubacterium_sulci	s	1.22047e-06	6.61497e-06	0	5.5e-05
Mogibacterium_diversum	s	3.94226e-07	2.23247e-06	0	2e-05
Clostridiales_bacterium_1_7_47FAA	s	1.20034e-05	7.77362e-05	0	0.0010367
Intestinimonas_butyriciproducens	s	0.000126466	0.000508321	0	0.0063396
Lawsonibacter_asaccharolyticus	s	7.30157e-05	0.000179657	0	0.001446
Monoglobus_pectinilyticus	s	2.87352e-05	0.000226315	0	0.0034045
Anaerofustis_stercorihominis	s	9.04934e-06	0.000164074	0	0.003205
Eubacteriaceae_bacterium_CHKCI005	s	3.48031e-07	5.3744e-06	0	0.000103
Eubacterium_callanderi	s	2.4937e-06	2.94652e-05	0	0.0005447
Eubacterium_dolichum_CAG_375	s	6.68126e-05	0.000655145	0	0.0123064
Eubacterium_eligens	s	0.0200742	0.0425216	0	0.457988
Eubacterium_hallii	s	0.000810401	0.00163975	0	0.0241703
Eubacterium_limosum	s	8.24934e-07	5.45428e-06	0	6.23e-05
Eubacterium_ramulus	s	0.000573164	0.00113126	0	0.0166672
Eubacterium_sp_CAG_180	s	0.00355989	0.014696	0	0.151323
Eubacterium_sp_CAG_251	s	0.000815075	0.00254326	0	0.0208411
Eubacterium_sp_CAG_274	s	0.00672888	0.0197177	0	0.197978
Eubacterium_sp_CAG_38	s	0.0117033	0.0353468	0	0.555315
Eubacterium_sp_OM08_24	s	0.000127834	0.00150708	0	0.0261565
Eubacterium_ventriosum	s	0.000493985	0.00107142	0	0.0098384
Mageeibacillus_indolicus	s	9.69895e-06	0.000165517	0	0.0032256
Anaerostipes_caccae	s	4.70682e-06	4.15801e-05	0	0.0006951
Anaerostipes_hadrus	s	0.00546534	0.0125769	0	0.174143
Anaerotignum_lactatifermentans	s	0.000227109	0.00118505	0	0.0131943
Blautia_coccoides	s	1.64441e-05	0.000201707	0	0.0038189
Blautia_hansenii	s	0.000418778	0.00230954	0	0.033052
Blautia_hydrogenotrophica	s	3.26509e-06	1.80755e-05	0	0.0001623
Blautia_obeum	s	0.000655819	0.0012836	0	0.0139931
Blautia_producta	s	2.24953e-05	0.000260728	0	0.004867
Blautia_sp_CAG_257	s	0.000207473	0.00124102	0	0.0154695
Blautia_wexlerae	s	0.00372031	0.00720677	0	0.0685453	Y
Ruminococcus_gnavus	s	0.0052382	0.0158958	0	0.19409
Ruminococcus_torques	s	0.00327266	0.00645613	0	0.0511644
Butyrivibrio_crossotus	s	0.000356781	0.00695494	0	0.135934
Coprococcus_catus	s	0.000536927	0.00167829	0	0.0298257
Coprococcus_comes	s	0.00104766	0.00195163	0	0.0171277
Coprococcus_eutactus	s	0.00261109	0.0108064	0	0.110696
Dorea_formicigenerans	s	0.000871235	0.00116546	0	0.0080321
Dorea_longicatena	s	0.00161052	0.00223012	0	0.0206706
Dorea_sp_CAG_317	s	2.34517e-05	0.000209109	0	0.0034501
Eisenbergiella_massiliensis	s	0.000137948	0.00144335	0	0.0278258
Eisenbergiella_tayi	s	3.32291e-05	0.000206725	0	0.003153
Fusicatenibacter_saccharivorans	s	0.00534117	0.00830619	0	0.0667353
Lachnoanaerobaculum_saburreum	s	1.24567e-06	9.31564e-06	0	0.0001329
Lachnoanaerobaculum_umeaense	s	2.37008e-07	2.74261e-06	0	4.34e-05
Clostridium_aldenense	s	6.2964e-05	0.000227732	0	0.0032011
Clostridium_asparagiforme	s	0.000107153	0.000379753	0	0.0044194
Clostridium_bolteae	s	0.00153163	0.00381373	0	0.0387734	Y
Clostridium_citroniae	s	0.000243022	0.00063772	0	0.0102671
Clostridium_clostridioforme	s	0.000493723	0.0038641	0	0.0700196
Clostridium_hylemonae	s	2.03365e-05	0.000325131	0	0.0061785
Clostridium_lavalense	s	7.74249e-05	0.000377828	0	0.0064667
Clostridium_saccharolyticum	s	0.000124541	0.00172054	0	0.0330123
Clostridium_scindens	s	2.14646e-06	1.97634e-05	0	0.0003637
Clostridium_symbiosum	s	0.000339843	0.00214236	0	0.0399923
Lachnoclostridium_sp_An118	s	6.71916e-08	1.30981e-06	0	2.56e-05
Lachnoclostridium_sp_An131	s	6.70604e-07	8.61093e-06	0	0.0001577
Lachnoclostridium_sp_An138	s	1.97892e-05	0.000359325	0	0.0070191
Eubacterium_rectale	s	0.0235073	0.0424551	0	0.342547
Lachnospiraceae_bacterium_2_1_46FAA	s	0.000134496	0.00101075	0	0.0171965
Lachnospiraceae_bacterium_oral_taxon_096	s	1.07066e-05	5.5529e-05	0	0.0007377
Lachnospira_pectinoschiza	s	0.02139	0.0538985	0	0.471337
Murimonas_intestini	s	6.71181e-06	6.5647e-05	0	0.0009818
Oribacterium_parvum	s	1.00236e-06	6.30511e-06	0	8.11e-05
Oribacterium_sinus	s	2.37349e-06	1.59799e-05	0	0.0002178
Oribacterium_sp_oral_taxon_078	s	1.32546e-07	1.81141e-06	0	2.97e-05
Robinsoniella_sp_RHS	s	6.97638e-07	1.35074e-05	0	0.000264
Roseburia_faecis	s	0.0184359	0.0294992	0	0.203091
Roseburia_hominis	s	0.00179074	0.00425833	0	0.0335438
Roseburia_intestinalis	s	0.0132759	0.0423848	0	0.510468
Roseburia_inulinivorans	s	0.0158645	0.0243885	0	0.159211
Roseburia_sp_CAG_182	s	4.21215e-05	0.000421408	0	0.0070792
Roseburia_sp_CAG_303	s	0.000385559	0.00177569	0	0.0237056
Roseburia_sp_CAG_309	s	2.70866e-07	5.28015e-06	0	0.0001032
Roseburia_sp_CAG_471	s	0.000133068	0.000551552	0	0.0067504
Sellimonas_intestinalis	s	0.000115411	0.000666843	0	0.0103391
Shuttleworthia_satelles	s	1.49344e-07	2.55979e-06	0	4.95e-05
Stomatobaculum_longum	s	2.48793e-06	2.00033e-05	0	0.0003297
Tyzzerella_nexilis	s	0.000276133	0.00152148	0	0.0222515
Oscillibacter_sp_57_20	s	0.00207455	0.00369737	0	0.0204575
Oscillibacter_sp_CAG_241	s	0.000240395	0.00081762	0	0.0095813
Oscillibacter_sp_PC13	s	1.63832e-06	9.17935e-06	0	0.000102
Clostridioides_difficile	s	3.81654e-06	3.42406e-05	0	0.0004636
Intestinibacter_bartlettii	s	0.000168206	0.000624273	0	0.00779
Paeniclostridium_sordellii	s	1.53071e-06	2.85397e-05	0	0.0005575
Paraclostridium_bifermentans	s	4.021e-06	5.65678e-05	0	0.0010476
Peptostreptococcus_anaerobius	s	1.56997e-05	0.000283878	0	0.0055443
Peptostreptococcus_stomatis	s	6.41444e-06	5.2689e-05	0	0.0009416
Romboutsia_ilealis	s	2.11142e-05	0.000114472	0	0.0016742
Terrisporobacter_othiniensis	s	1.94751e-07	2.39075e-06	0	4.13e-05
Agathobaculum_butyriciproducens	s	0.00222701	0.00263767	0	0.0212687
Anaerofilum_sp_An201	s	1.71738e-05	0.000334496	0	0.0065377
Anaeromassilibacillus_sp_An250	s	2.20848e-05	0.000112085	0	0.0015246
Anaerotruncus_colihominis	s	0.000106491	0.000361404	0	0.0037921
Anaerotruncus_sp_CAG_528	s	0.000262426	0.00329345	0	0.0562237
Faecalibacterium_prausnitzii	s	0.0717762	0.0782103	0	0.654133	Y
Flavonifractor_plautii	s	0.0037441	0.0119452	0	0.196552	Y
Flavonifractor_sp_An10	s	1.14961e-07	1.91977e-06	0	3.69e-05
Flavonifractor_sp_An100	s	8.29396e-07	9.07204e-06	0	0.0001183
Gemmiger_formicilis	s	0.000865745	0.00152203	0	0.0124241
Gemmiger_sp_An120	s	3.07087e-08	5.98622e-07	0	1.17e-05
Gemmiger_sp_An194	s	1.83727e-09	3.5815e-08	0	7e-07
Gemmiger_sp_An50	s	1.19843e-06	1.6086e-05	0	0.0002951
Gemmiger_sp_An87	s	1.30131e-05	0.00023212	0	0.0045187
Harryflintia_acetispora	s	1.06614e-06	8.24653e-06	0	0.0001246
Pseudoflavonifractor_capillosus	s	5.44094e-07	1.01946e-05	0	0.0001992
Pseudoflavonifractor_sp_An184	s	2.67585e-06	3.45722e-05	0	0.0006497
Clostridium_leptum	s	0.000303448	0.00141488	0	0.0196392
Clostridium_methylpentosum	s	3.42861e-06	2.40287e-05	0	0.0003062
Eubacterium_siraeum	s	0.00202836	0.0102595	0	0.0937664
Ruminococcaceae_bacterium_D16	s	9.39055e-06	9.34782e-05	0	0.0017024
Ruminococcaceae_bacterium_D5	s	6.04829e-06	3.70092e-05	0	0.0004346
Ruminococcus_bicirculans	s	0.00533553	0.0151807	0	0.133706
Ruminococcus_bromii	s	0.0097437	0.0200699	0	0.162333
Ruminococcus_callidus	s	4.84142e-05	0.000207873	0	0.0019773
Ruminococcus_lactaris	s	0.000913142	0.00240177	0	0.0269234
Ruminococcus_obeum_CAG_39	s	7.82152e-08	8.37866e-07	0	1.03e-05
Ruminococcus_sp_CAG_330	s	1.5757e-05	0.000155522	0	0.0019501
Ruminococcus_sp_CAG_403	s	8.7795e-05	0.000928213	0	0.0125154
Ruminococcus_sp_CAG_488	s	6.25916e-05	0.000660048	0	0.0080165
Ruminococcus_sp_CAG_563	s	6.35171e-08	9.26375e-07	0	1.69e-05
Ruminococcus_sp_CAG_624	s	6.76764e-05	0.00126783	0	0.0247611
Ruthenibacterium_lactatiformans	s	0.000721816	0.001752	0	0.0208784
Absiella_dolichum	s	6.84528e-05	0.000659553	0	0.0123598
Bulleidia_extructa	s	1.38845e-07	1.42928e-06	0	2.11e-05
Candidatus_Stoquefichus_sp_KLE1796	s	2.81764e-05	0.000238056	0	0.0034404
Catenibacterium_mitsuokai	s	4.68987e-05	0.000610207	0	0.0115129
Coprobacillus_cateniformis	s	8.84822e-05	0.000365576	0	0.0038117
Dielma_fastidiosa	s	3.18465e-05	0.000144088	0	0.0021114
Eggerthia_catenaformis	s	7.83727e-07	7.28735e-06	0	9.31e-05
Clostridium_innocuum	s	0.000213671	0.00121482	0	0.0196787
Clostridium_spiroforme	s	4.72803e-05	0.000352008	0	0.0054363
Erysipelatoclostridium_ramosum	s	0.000616445	0.0029935	0	0.0419274
Erysipelothrix_larvae	s	2.65748e-05	0.000295769	0	0.0053705
Faecalicoccus_pleomorphus	s	4.17215e-05	0.000520164	0	0.0093771
Faecalitalea_cylindroides	s	3.78081e-05	0.000361723	0	0.0055588
Holdemanella_biformis	s	0.000230095	0.0017801	0	0.0318726
Holdemania_filiformis	s	0.000134743	0.000261056	0	0.0025682
Massiliomicrobiota_timonensis	s	8.84777e-07	8.97848e-06	0	0.000128
Solobacterium_moorei	s	4.13701e-06	5.11303e-05	0	0.0009754
Turicibacter_sanguinis	s	0.000253882	0.00149756	0	0.0195379
Firmicutes_bacterium_CAG_110	s	0.000268358	0.00169493	0	0.0266877
Firmicutes_bacterium_CAG_145	s	2.27974e-05	0.000137509	0	0.0015691
Firmicutes_bacterium_CAG_170	s	0.000265097	0.00259148	0	0.042141
Firmicutes_bacterium_CAG_238	s	9.15774e-06	0.000118811	0	0.0022329
Firmicutes_bacterium_CAG_424	s	0.000149157	0.00257724	0	0.0502987
Firmicutes_bacterium_CAG_646	s	4.51654e-06	5.6915e-05	0	0.0010863
Firmicutes_bacterium_CAG_83	s	0.00117981	0.00329504	0	0.0314341
Firmicutes_bacterium_CAG_94	s	4.63045e-06	5.89108e-05	0	0.0009891
Firmicutes_bacterium_CAG_95	s	0.000206565	0.00113121	0	0.0145941
Acidaminococcus_fermentans	s	1.08136e-07	1.5463e-06	0	2.9e-05
Acidaminococcus_intestini	s	0.000154318	0.00183178	0	0.0280397
Acidaminococcus_sp_CAG_542	s	1.69423e-06	2.65944e-05	0	0.0005044
Phascolarctobacterium_faecium	s	0.00425468	0.00586628	0	0.0544306
Phascolarctobacterium_sp_CAG_266	s	0.000188474	0.00118085	0	0.0102257
Phascolarctobacterium_succinatutens	s	0.00071037	0.00517598	0	0.0717801
Megamonas_funiformis	s	0.00666828	0.028119	0	0.334983
Megamonas_funiformis_CAG_377	s	0.000545903	0.0048206	0	0.0755599
Megamonas_hypermegale	s	0.00186423	0.00577376	0	0.0578718
Megamonas_rupellensis	s	0.000560729	0.0056815	0	0.0863882
Mitsuokella_jalaludinii	s	3.95559e-05	0.000552715	0	0.0099982
Mitsuokella_multacida	s	0.000197731	0.00157049	0	0.0222639
Selenomonas_noxia	s	1e-07	1.49224e-06	0	2.7e-05
Allisonella_histaminiformans	s	1.88906e-05	8.07167e-05	0	0.0008394
Anaeroglobus_geminatus	s	1.08549e-05	0.000106462	0	0.0015494
Dialister_invisus	s	7.1069e-05	0.000375234	0	0.0043327
Dialister_micraerophilus	s	2.16614e-06	3.5629e-05	0	0.0006883
Dialister_pneumosintes	s	1.38845e-05	0.000208955	0	0.0040694
Dialister_sp_CAG_357	s	0.00461055	0.0127726	0	0.0831154
Dialister_succinatiphilus	s	0.000231067	0.00193296	0	0.0248691
Megasphaera_cerevisiae	s	1.70604e-07	2.72958e-06	0	5.17e-05
Megasphaera_elsdenii	s	0.000190665	0.00208393	0	0.0386687
Megasphaera_micronuciformis	s	0.000133721	0.0012312	0	0.019331
Megasphaera_stantonii	s	4.65354e-07	9.07143e-06	0	0.0001773
Negativicoccus_succinicivorans	s	3.44278e-06	6.59148e-05	0	0.0012882
Veillonella_atypica	s	0.000467253	0.00294453	0	0.0467236
Veillonella_denticariosi	s	3.29475e-06	6.22678e-05	0	0.0012165
Veillonella_dispar	s	0.000213475	0.00162533	0	0.0300278
Veillonella_infantium	s	8.95903e-05	0.000333197	0	0.0038856
Veillonella_parvula	s	0.00239914	0.0140359	0	0.217886
Veillonella_rodentium	s	1.70341e-07	1.53421e-06	0	2.11e-05
Veillonella_rogosae	s	1.31281e-05	5.99266e-05	0	0.0006538
Veillonella_seminalis	s	1.92675e-05	0.000336186	0	0.0065216
Veillonella_sp_CAG_933	s	2.21522e-07	4.31826e-06	0	8.44e-05
Veillonella_sp_T11011_6	s	7.65748e-05	0.000460207	0	0.0073255
Veillonella_tobetsuensis	s	3.93459e-05	0.000222597	0	0.0036165
Anaerococcus_vaginalis	s	2.63564e-05	0.000357515	0	0.006093
Finegoldia_magna	s	4.61244e-05	0.000591336	0	0.0092737
Parvimonas_micra	s	5.87428e-06	3.81482e-05	0	0.0005412
Peptoniphilus_coxii	s	3.64391e-05	0.000409296	0	0.005461
Peptoniphilus_grossensis	s	9.76378e-08	1.90331e-06	0	3.72e-05
Peptoniphilus_harei	s	4.78255e-05	0.000562163	0	0.0088318
Peptoniphilus_lacrimalis	s	2.82517e-05	0.00029166	0	0.0034528
Peptoniphilus_sp_BV3C26	s	4.54409e-06	8.65378e-05	0	0.0016913
Peptoniphilus_sp_HMSC062D09	s	1.14856e-06	1.1268e-05	0	0.0001577
Bacteroides_coagulans	s	3.04436e-06	4.37011e-05	0	0.0008229
Fusobacterium_equinum	s	7.87402e-09	1.53493e-07	0	3e-06
Fusobacterium_gonidiaformans	s	8.33071e-07	1.3296e-05	0	0.0002566
Fusobacterium_mortiferum	s	0.00327832	0.0208565	0	0.289338
Fusobacterium_nucleatum	s	2.74706e-05	0.000217585	0	0.0028565
Fusobacterium_periodonticum	s	6.45302e-06	3.73027e-05	0	0.0005555
Fusobacterium_sp_oral_taxon_370	s	1.89344e-06	2.8998e-05	0	0.0005538
Fusobacterium_ulcerans	s	0.000568645	0.00304143	0	0.0310515
Fusobacterium_varium	s	0.000539057	0.00291228	0	0.0328315
Leptotrichia_wadei	s	5.66404e-07	7.38914e-06	0	0.0001302
Victivallis_vadensis	s	5.90357e-05	0.000404289	0	0.0055071
Agrobacterium_fabrum	s	1.7874e-07	3.48429e-06	0	6.81e-05
Lautropia_mirabilis	s	2.86168e-06	2.51371e-05	0	0.0004493
Comamonas_kerstersii	s	1.97777e-05	0.000221038	0	0.0040549
Oxalobacter_formigenes	s	5.62496e-05	0.000237257	0	0.0024059
Parasutterella_excrementihominis	s	0.00479892	0.00899829	0	0.0620795
Sutterella_parvirubra	s	0.000507888	0.00361808	0	0.0465425
Turicimonas_muris	s	0.000663223	0.00114555	0	0.0106314
Morococcus_cerebrosus	s	1.09711e-07	1.70429e-06	0	3.18e-05
Neisseria_elongata	s	5.75066e-07	9.75689e-06	0	0.0001898
Neisseria_flavescens	s	2.64512e-05	0.000404401	0	0.0078856
Neisseria_macacae	s	1.33858e-08	2.60938e-07	0	5.1e-06
Neisseria_mucosa	s	3.95801e-07	5.64898e-06	0	0.0001066
Neisseria_perflava	s	4.78478e-07	8.07102e-06	0	0.0001567
Neisseria_sicca	s	3.77165e-07	3.82184e-06	0	6.11e-05
Neisseria_sp_oral_taxon_014	s	8.66142e-08	1.52397e-06	0	2.96e-05
Neisseria_subflava	s	3.99213e-07	2.88193e-06	0	3.92e-05
Bilophila_wadsworthia	s	0.000563548	0.000779493	0	0.0054361
Desulfovibrionaceae_bacterium	s	3.21591e-05	0.000194794	0	0.0016772
Desulfovibrio_legallii	s	1.66656e-05	0.000324873	0	0.0063496
Desulfovibrio_piger	s	0.000164959	0.000920335	0	0.0117233
Campylobacter_concisus	s	9.96089e-06	8.6126e-05	0	0.0015738
Campylobacter_curvus	s	1.04462e-07	2.03634e-06	0	3.98e-05
Campylobacter_gracilis	s	5.72703e-07	5.27456e-06	0	8.72e-05
Campylobacter_hominis	s	4.5869e-05	0.000484985	0	0.0075729
Campylobacter_showae	s	3.68766e-07	3.73968e-06	0	5.26e-05
Campylobacter_ureolyticus	s	2.08207e-05	0.000269811	0	0.0047129
Aeromonas_caviae	s	5.48294e-07	6.72112e-06	0	9.2e-05
Aeromonas_media	s	8.89764e-08	1.73447e-06	0	3.39e-05
Aeromonas_veronii	s	5.91076e-07	7.85675e-06	0	0.0001359
Anaerobiospirillum_thomasii	s	9.11811e-07	1.46139e-05	0	0.000277
Succinatimonas_hippei	s	2.14887e-05	0.000289313	0	0.0054049
Cardiobacterium_hominis	s	8.7664e-08	1.20853e-06	0	1.76e-05
Cardiobacterium_valvarum	s	1.05774e-07	1.33855e-06	0	2.46e-05
Plesiomonas_shigelloides	s	8.22257e-06	0.000133524	0	0.0025832
Atlantibacter_hermannii	s	3.5958e-08	7.00951e-07	0	1.37e-05
Citrobacter_amalonaticus	s	2.37528e-05	0.000308009	0	0.0053548
Citrobacter_braakii	s	2.77396e-05	0.000241698	0	0.0037245
Citrobacter_europaeus	s	1.57832e-05	0.000211368	0	0.0040454
Citrobacter_farmeri	s	3.51601e-06	4.50924e-05	0	0.0007135
Citrobacter_freundii	s	0.000133682	0.000819999	0	0.0106919
Citrobacter_koseri	s	1.24176e-05	0.00017625	0	0.0033628
Citrobacter_pasteurii	s	1.55226e-05	9.21912e-05	0	0.0012935
Citrobacter_portucalensis	s	6.98525e-05	0.000436542	0	0.0062922
Citrobacter_sp_50677481	s	1.6273e-07	3.17219e-06	0	6.2e-05
Citrobacter_werkmanii	s	1.59449e-05	0.000119033	0	0.0015443
Citrobacter_youngae	s	0.000164824	0.00101549	0	0.0168467
Cronobacter_malonaticus	s	2.29318e-06	3.02168e-05	0	0.0004961
Cronobacter_sakazakii	s	1.54856e-08	3.01869e-07	0	5.9e-06
Enterobacter_bugandensis	s	0.000190298	0.00319367	0	0.0621489
Enterobacter_cloacae_complex	s	0.000215431	0.00180403	0	0.0287926
Enterobacter_mori	s	5.66186e-05	0.000696635	0	0.0116729
Enterobacter_soli	s	1.25197e-07	1.90647e-06	0	3.51e-05
Escherichia_coli	s	0.0211202	0.0524141	0	0.415928	Y
Escherichia_fergusonii	s	3.12415e-05	0.000319656	0	0.0050207
Escherichia_marmotae	s	7.39108e-07	9.9112e-06	0	0.00015
Klebsiella_aerogenes	s	8.61131e-05	0.000886303	0	0.0164226
Klebsiella_michiganensis	s	2.34475e-05	0.000172071	0	0.0026567
Klebsiella_oxytoca	s	0.000169502	0.00215739	0	0.0398559
Klebsiella_pneumoniae	s	0.00452455	0.0189549	0	0.22536
Klebsiella_quasipneumoniae	s	0.000743187	0.00385319	0	0.0612092
Klebsiella_variicola	s	0.00155699	0.00798253	0	0.105329
Klebsiella_variicola_CAG_634	s	2.91864e-07	4.01779e-06	0	5.58e-05
Kluyvera_ascorbata	s	0.000153253	0.00281881	0	0.0550808
Kluyvera_cryocrescens	s	3.17822e-06	2.96862e-05	0	0.0004853
Kluyvera_georgiana	s	5.17617e-05	0.000932615	0	0.0182185
Kosakonia_cowanii	s	1.32021e-07	1.73245e-06	0	3.02e-05
Kosakonia_sp_S29	s	1.10236e-08	2.1489e-07	0	4.2e-06
Leclercia_adecarboxylata	s	1.87291e-05	0.00028128	0	0.0054331
Pluralibacter_gergoviae	s	1.75144e-06	1.91745e-05	0	0.0002768
Raoultella_ornithinolytica	s	2.4474e-05	0.000309755	0	0.0059813
Raoultella_planticola	s	6.86142e-06	6.94162e-05	0	0.0011315
Salmonella_enterica	s	1.05276e-06	2.0262e-05	0	0.000396
Hafnia_alvei	s	2.87402e-07	5.60249e-06	0	0.0001095
Hafnia_paralvei	s	1.86483e-06	2.49238e-05	0	0.0004575
Morganella_morganii	s	3.1757e-05	0.000401158	0	0.0071162
Proteus_hauseri	s	1.29832e-05	0.000146516	0	0.0024041
Proteus_mirabilis	s	2.40496e-05	0.00038333	0	0.0074396
Proteus_vulgaris	s	7.45486e-06	0.000117462	0	0.0022368
Providencia_alcalifaciens	s	6.90289e-08	9.6069e-07	0	1.51e-05
Serratia_marcescens	s	2.51969e-08	4.91177e-07	0	9.6e-06
Serratia_ureilytica	s	5.85302e-08	8.31759e-07	0	1.4e-05
Aggregatibacter_aphrophilus	s	4.0189e-06	5.16249e-05	0	0.0009286
Aggregatibacter_segnis	s	8.07402e-06	3.56758e-05	0	0.0003582
Aggregatibacter_sp_oral_taxon_458	s	3.8294e-07	5.44656e-06	0	0.0001035
Haemophilus_haemolyticus	s	8.89501e-07	9.42858e-06	0	0.0001504
Haemophilus_parahaemolyticus	s	1.45591e-06	1.05491e-05	0	0.0001344
Haemophilus_parainfluenzae	s	0.00106018	0.00341752	0	0.033685
Haemophilus_paraphrohaemolyticus	s	9.91024e-06	0.000137451	0	0.0026356
Haemophilus_pittmaniae	s	1.33937e-06	1.495e-05	0	0.0002389
Haemophilus_quentini	s	9.20735e-07	1.73484e-05	0	0.000339
Haemophilus_sp_HMSC71H05	s	3.69995e-05	0.000251485	0	0.0043477
Haemophilus_sputorum	s	9.45564e-06	5.33643e-05	0	0.0006925
Acinetobacter_bereziniae	s	2.34908e-07	4.12963e-06	0	8.02e-05
Acinetobacter_nosocomialis	s	2.86089e-08	5.57691e-07	0	1.09e-05
Acinetobacter_parvus	s	1.12598e-07	2.19495e-06	0	4.29e-05
Pseudomonas_aeruginosa_group	s	2.1e-06	8.95226e-06	0	7.82e-05
Pseudomonas_moraviensis	s	1.46982e-08	2.8652e-07	0	5.6e-06
Proteobacteria_bacterium_CAG_139	s	0.00616804	0.0121599	0	0.103899
Cloacibacillus_evryensis	s	6.2147e-06	3.96228e-05	0	0.0004845
Cloacibacillus_porcorum	s	1.24425e-05	6.23285e-05	0	0.0009033
Fretibacterium_fastidiosum	s	3.0315e-07	1.41051e-06	0	1.42e-05
Pyramidobacter_piscolens	s	3.22864e-05	0.000202705	0	0.0029656
Pyramidobacter_sp_C12_8	s	1.40604e-06	1.33855e-05	0	0.0001955
Akkermansia_muciniphila	s	0.00191026	0.012756	0	0.202695
Aspergillus_sydowii	s	3.5958e-08	7.00951e-07	0	1.37e-05
Saccharomyces_cerevisiae	s	4.21969e-06	2.62363e-05	0	0.0002465
Blastocystis_sp_subtype_1	s	1.74436e-06	3.40038e-05	0	0.0006646
Actinomyces_cardiffensis	s	2.15223e-08	3.20856e-07	0	5.8e-06
Actinomyces_naeslundii	s	5.51181e-09	1.07445e-07	0	2.1e-06
Actinomyces_sp_HPA0247	s	1.27087e-06	2.43958e-05	0	0.0004768
Bifidobacterium_pseudolongum	s	2.94724e-06	4.23659e-05	0	0.0007756
Bifidobacterium_pullorum	s	1.75853e-08	3.42801e-07	0	6.7e-06
Corynebacterium_pyruviciproducens	s	4.2126e-07	8.21187e-06	0	0.0001605
Microbacterium_oxydans	s	1.2336e-08	2.40472e-07	0	4.7e-06
Pseudopropionibacterium_propionicum	s	4.46194e-09	8.69793e-08	0	1.7e-06
Olsenella_uli	s	2.04462e-07	2.81488e-06	0	3.95e-05
Slackia_exigua	s	2.22992e-06	4.34692e-05	0	0.0008496
Bacteroides_sp_CAG_661	s	0.000112773	0.00219836	0	0.0429667
Bacteroidales_bacterium_KA00251	s	1.69554e-07	3.30521e-06	0	6.46e-05
Barnesiella_sp_An22	s	4.91207e-06	9.37896e-05	0	0.0018328
Prevotella_amnii	s	3.94034e-05	0.000751049	0	0.0146762
Prevotella_bergensis	s	8.45144e-08	1.64749e-06	0	3.22e-05
Prevotella_histicola	s	2.72966e-08	5.32108e-07	0	1.04e-05
Prevotella_melaninogenica	s	2.86089e-08	5.57691e-07	0	1.09e-05
Prevotella_nigrescens	s	4.01575e-08	7.82813e-07	0	1.53e-05
Alistipes_sp_CHKCI003	s	1.99475e-07	3.88848e-06	0	7.6e-05
Chryseobacterium_mucoviscidosis	s	4.97638e-07	9.70075e-06	0	0.0001896
Trichococcus_flocculiformis	s	4.52467e-06	8.82021e-05	0	0.0017239
Bavariicoccus_seileri	s	7.33071e-07	1.35425e-05	0	0.0002643
Enterococcus_mundtii	s	3.86089e-07	7.52626e-06	0	0.0001471
Enterococcus_thailandicus	s	1.67848e-06	2.14493e-05	0	0.000342
Tetragenococcus_halophilus	s	1.73753e-07	3.38707e-06	0	6.62e-05
Lactobacillus_panis	s	1.61942e-07	3.15684e-06	0	6.17e-05
Lactobacillus_pontis	s	2.8084e-07	5.47458e-06	0	0.000107
Pediococcus_pentosaceus	s	8.97638e-08	1.74982e-06	0	3.42e-05
Lactococcus_raffinolactis	s	4.56955e-07	8.9077e-06	0	0.0001741
Streptococcus_iniae	s	5.06562e-08	9.87471e-07	0	1.93e-05
Streptococcus_parauberis	s	4.06824e-08	7.93046e-07	0	1.55e-05
Streptococcus_varani	s	2.69029e-07	3.7084e-06	0	5.39e-05
Clostridium_baratii	s	6.31496e-07	8.78719e-06	0	0.000138
Clostridium_sp_CAG_413	s	1.62963e-05	0.000317674	0	0.0062089
Clostridium_sp_CAG_510	s	6.64646e-06	0.000129563	0	0.0025323
Eubacterium_brachy	s	5.77428e-08	1.12561e-06	0	2.2e-05
Eubacterium_infirmum	s	2.91339e-08	4.12809e-07	0	6.9e-06
Eubacterium_nodatum	s	5.24934e-09	1.02329e-07	0	2e-06
Clostridiales_bacterium_CHKCI006	s	7.021e-07	1.36864e-05	0	0.0002675
Eubacterium_maltosivorans	s	4.39108e-07	8.55978e-06	0	0.0001673
Eubacterium_sp_An11	s	4e-07	7.79744e-06	0	0.0001524
Anaerosporobacter_mobilis	s	8.24147e-08	1.60656e-06	0	3.14e-05
Cellulosilyticum_lentocellum	s	4.42178e-06	8.61965e-05	0	0.0016847
Faecalicatena_orotica	s	7.14173e-07	1.14741e-05	0	0.0002205
Tyzzerella_sp_An114	s	3.77165e-07	7.35231e-06	0	0.0001437
Criibacterium_bergeronii	s	2.66667e-07	5.19829e-06	0	0.0001016
Anaeromassilibacillus_sp_An172	s	1.75591e-07	3.42289e-06	0	6.69e-05
Selenomonas_sputigena	s	2.3937e-07	4.66618e-06	0	9.12e-05
Megasphaera_hexanoica	s	5.46194e-07	8.64726e-06	0	0.000163
Veillonellaceae_bacterium_DNF00626	s	4.21811e-06	6.17667e-05	0	0.0010942
Veillonella_montpellierensis	s	1.41549e-06	2.75929e-05	0	0.0005393
Anaerococcus_lactolyticus	s	1.16346e-05	0.000226688	0	0.0044306
Anaerococcus_tetradius	s	1.42591e-05	0.00027796	0	0.0054327
Peptoniphilus_duerdenii	s	3.90472e-06	7.61171e-05	0	0.0014877
Peptoniphilus_sp_DNF00840	s	3.16273e-07	4.36181e-06	0	6.39e-05
Cetobacterium_somerae	s	3.87591e-05	0.000755553	0	0.0147672
Sneathia_amnii	s	4.26971e-05	0.000822717	0	0.0160793
Brevundimonas_abyssalis	s	2.3622e-08	4.60478e-07	0	9e-06
Brevundimonas_diminuta	s	4.53543e-07	8.84119e-06	0	0.0001728
Brevundimonas_vesicularis	s	5.38163e-06	0.000104907	0	0.0020504
Bosea_vaviloviae	s	4.84777e-07	9.45004e-06	0	0.0001847
Agrobacterium_salinitolerans	s	2.30184e-07	4.48711e-06	0	8.77e-05
Agrobacterium_tumefaciens	s	1.03438e-06	2.01638e-05	0	0.0003941
Shinella_sp_HZN7	s	3.49081e-08	6.80485e-07	0	1.33e-05
Sphingobium_yanoikuyae	s	1.62992e-07	3.1773e-06	0	6.21e-05
Sphingomonas_koreensis	s	9.03412e-07	1.76107e-05	0	0.0003442
Sphingopyxis_alaskensis	s	8.66142e-09	1.68842e-07	0	3.3e-06
Sphingopyxis_granuli	s	2.91339e-08	5.67923e-07	0	1.11e-05
Acidovorax_sp_MR_S7	s	1.03727e-06	2.02201e-05	0	0.0003952
Alicycliphilus_denitrificans	s	5.00787e-07	9.76214e-06	0	0.0001908
Comamonas_testosteroni	s	3.96008e-05	0.000771961	0	0.0150879
Comamonas_thiooxydans	s	2.29268e-05	0.000446925	0	0.0087351
Eikenella_corrodens	s	6.92913e-08	1.35074e-06	0	2.64e-05
Arcobacter_butzleri	s	3.93701e-09	7.67464e-08	0	1.5e-06
Arcobacter_cryaerophilus	s	3.64304e-07	7.1016e-06	0	0.0001388
Campylobacter_jejuni	s	6.93858e-06	0.000135258	0	0.0026436
Escherichia_albertii	s	2.48766e-06	3.74733e-05	0	0.0007159
Pseudocitrobacter_faecalis	s	4.4336e-06	7.0364e-05	0	0.0013642
Raoultella_terrigena	s	1.94226e-08	3.78616e-07	0	7.4e-06
Edwardsiella_tarda	s	1.41071e-05	0.000274194	0	0.0053591
Proteus_penneri	s	6.72703e-07	1.31134e-05	0	0.0002563
Providencia_rettgeri	s	5.29108e-06	8.25464e-05	0	0.0015821
Acinetobacter_johnsonii	s	1.34929e-05	0.000263025	0	0.0051408
Acinetobacter_junii	s	1.96588e-06	3.8322e-05	0	0.000749
Stenotrophomonas_acidaminiphila	s	9.66667e-07	1.88438e-05	0	0.0003683
Mycoplasma_hominis	s	3.73228e-07	7.27556e-06	0	0.0001422
Methanobrevibacter	g	1.53365e-05	0.000133317	0	0.0018882
Methanosphaera	g	1.07349e-06	1.35491e-05	0	0.0002429
Actinobaculum	g	1.35171e-07	1.4087e-06	0	1.89e-05
Actinomyces	g	4.58879e-05	0.00023646	0	0.0042483
Varibaculum	g	3.24777e-06	4.54275e-05	0	0.0007442
Aeriscardovia	g	3.22835e-08	4.45134e-07	0	6.5e-06
Alloscardovia	g	8.35958e-07	9.59967e-06	0	0.0001384
Bifidobacterium	g	0.00530764	0.0142385	0	0.234122
Gardnerella	g	2.40323e-05	0.000301501	0	0.0056365
Parascardovia	g	5.30184e-08	1.03352e-06	0	2.02e-05
Scardovia	g	2.66142e-06	4.1184e-05	0	0.0008017
Corynebacterium	g	7.31759e-07	9.1345e-06	0	0.0001605
Lawsonella	g	3.79948e-06	7.28877e-05	0	0.0014245
Rothia	g	4.78194e-05	0.000229424	0	0.003206
Tropheryma	g	1.07349e-07	1.4072e-06	0	2.26e-05
Propionibacterium	g	2.55381e-07	2.66798e-06	0	4.35e-05
Atopobium	g	4.84399e-05	0.000599563	0	0.0088322
Olsenella	g	3.59472e-05	0.00027343	0	0.00408
Collinsella	g	0.00161581	0.00253215	0	0.021195
Enorma	g	2.79205e-05	0.000221719	0	0.0039981
Adlercreutzia	g	0.000121848	0.000410322	0	0.0069531
Asaccharobacter	g	3.63787e-05	0.00011572	0	0.0019048
Eggerthella	g	0.000218719	0.000495612	0	0.0050878
Enterorhabdus	g	1.48163e-06	6.23077e-06	0	9.95e-05
Gordonibacter	g	6.07087e-05	0.000107915	0	0.0008424
Slackia	g	1.63787e-05	0.000163682	0	0.0028409
Bacteroides	g	0.464158	0.228102	0	0.912854	Y
Barnesiella	g	0.00216451	0.00552822	0	0.0480754
Coprobacter	g	0.00137721	0.00650253	0	0.0777814
Butyricimonas	g	0.00128626	0.00230247	0	0.0253337
Odoribacter	g	0.00308696	0.00446288	0	0.0267995
Porphyromonas	g	3.80811e-05	0.000288646	0	0.0037244
Sanguibacteroides	g	2.47297e-06	2.131e-05	0	0.0003204
Paraprevotella	g	0.0014846	0.00536739	0	0.0603498
Prevotella	g	0.105869	0.229152	0	0.923886	Y
Alistipes	g	0.0250596	0.0383144	0	0.241388
Parabacteroides	g	0.0261826	0.0286319	0	0.26087	Y
Arthrospira	g	1.31234e-09	2.55821e-08	0	5e-07
Gemella	g	2.6068e-05	8.5464e-05	0	0.0012109
Staphylococcus	g	4.93176e-07	5.59362e-06	0	6.99e-05
Abiotrophia	g	9.62992e-07	1.20054e-05	0	0.0002184
Carnobacterium	g	4.70866e-07	9.17887e-06	0	0.0001794
Granulicatella	g	3.4748e-06	1.76742e-05	0	0.0002125
Enterococcus	g	9.59402e-05	0.000661284	0	0.0087093
Lactobacillus	g	0.000462469	0.00309362	0	0.0422968
Pediococcus	g	3.19606e-06	4.75957e-05	0	0.0008794
Sharpea	g	9.52756e-08	1.31839e-06	0	2e-05
Leuconostoc	g	2.50315e-06	1.32039e-05	0	0.0001177
Weissella	g	1.19428e-05	6.39317e-05	0	0.0007578
Lactococcus	g	3.64115e-05	0.0004035	0	0.0077702
Streptococcus	g	0.0019915	0.00521118	0	0.0617593	Y
Catabacter	g	1.06394e-05	9.11207e-05	0	0.0017247
Christensenella	g	8.45801e-06	3.20882e-05	0	0.0003453
Butyricicoccus	g	0.000118823	0.00113716	0	0.021071
Clostridium	g	0.00382935	0.0124428	0	0.191586
Hungatella	g	0.000183916	0.000576543	0	0.0060767
Lactonifactor	g	3.70131e-06	3.41972e-05	0	0.0006372
Clostridiales_Family_XIII_Incertae_Sedis_unclassified	g	1.31286e-06	7.28897e-06	0	6.74e-05
Mogibacterium	g	3.94226e-07	2.23247e-06	0	2e-05
Clostridiales_unclassified	g	1.27055e-05	7.8825e-05	0	0.0010367
Intestinimonas	g	0.000126466	0.000508321	0	0.0063396
Lawsonibacter	g	7.30157e-05	0.000179657	0	0.001446
Monoglobus	g	2.87352e-05	0.000226315	0	0.0034045
Anaerofustis	g	9.04934e-06	0.000164074	0	0.003205
Eubacteriaceae_unclassified	g	3.48031e-07	5.3744e-06	0	0.000103
Eubacterium	g	0.0449577	0.0579296	0	0.576133	Y
Mageeibacillus	g	9.69895e-06	0.000165517	0	0.0032256
Anaerostipes	g	0.00547004	0.0125777	0	0.174143	Y
Anaerotignum	g	0.000227109	0.00118505	0	0.0131943
Blautia	g	0.0135554	0.0211516	5.5e-06	0.19409	Y
Butyrivibrio	g	0.000356781	0.00695494	0	0.135934
Coprococcus	g	0.00419568	0.0114468	0	0.112364
Dorea	g	0.00250521	0.00298895	0	0.0277672
Eisenbergiella	g	0.000171177	0.00145983	0	0.0278258
Fusicatenibacter	g	0.00534117	0.00830619	0	0.0667353
Lachnoanaerobaculum	g	1.48268e-06	9.97038e-06	0	0.0001329
Lachnoclostridium	g	0.0030233	0.00687438	0	0.0707562	Y
Lachnospira	g	0.02139	0.0538985	0	0.471337
Lachnospiraceae_unclassified	g	0.0236525	0.0426295	0	0.342547
Murimonas	g	6.71181e-06	6.5647e-05	0	0.0009818
Oribacterium	g	3.5084e-06	2.02201e-05	0	0.0002504
Robinsoniella	g	6.97638e-07	1.35074e-05	0	0.000264
Roseburia	g	0.049928	0.0603109	0	0.553646	Y
Sellimonas	g	0.000115411	0.000666843	0	0.0103391
Shuttleworthia	g	1.49344e-07	2.55979e-06	0	4.95e-05
Stomatobaculum	g	2.48793e-06	2.00033e-05	0	0.0003297
Tyzzerella	g	0.00027651	0.00152143	0	0.0222515
Oscillibacter	g	0.00231659	0.0040349	0	0.0204645
Clostridioides	g	3.81654e-06	3.42406e-05	0	0.0004636
Intestinibacter	g	0.000168206	0.000624273	0	0.00779
Paeniclostridium	g	1.53071e-06	2.85397e-05	0	0.0005575
Paraclostridium	g	4.021e-06	5.65678e-05	0	0.0010476
Peptostreptococcus	g	2.21142e-05	0.000288414	0	0.0055443
Romboutsia	g	2.11142e-05	0.000114472	0	0.0016742
Terrisporobacter	g	1.94751e-07	2.39075e-06	0	4.13e-05
Agathobaculum	g	0.00222701	0.00263767	0	0.0212687
Anaerofilum	g	1.71738e-05	0.000334496	0	0.0065377
Anaeromassilibacillus	g	2.22604e-05	0.000112945	0	0.0015246
Anaerotruncus	g	0.000368917	0.00330552	0	0.0562237
Faecalibacterium	g	0.0717762	0.0782103	0	0.654133	Y
Flavonifractor	g	0.00374504	0.0119449	0	0.196552	Y
Gemmiger	g	0.000879989	0.00153318	0	0.0124241
Harryflintia	g	1.06614e-06	8.24653e-06	0	0.0001246
Pseudoflavonifractor	g	3.21995e-06	3.60238e-05	0	0.0006497
Ruminococcaceae_unclassified	g	0.00235067	0.0104842	0	0.0939684
Ruminococcus	g	0.0162747	0.0274098	0	0.201758
Ruthenibacterium	g	0.000721816	0.001752	0	0.0208784
Absiella	g	6.84528e-05	0.000659553	0	0.0123598
Bulleidia	g	1.38845e-07	1.42928e-06	0	2.11e-05
Candidatus_Stoquefichus	g	2.81764e-05	0.000238056	0	0.0034404
Catenibacterium	g	4.68987e-05	0.000610207	0	0.0115129
Coprobacillus	g	8.84822e-05	0.000365576	0	0.0038117
Dielma	g	3.18465e-05	0.000144088	0	0.0021114
Eggerthia	g	7.83727e-07	7.28735e-06	0	9.31e-05
Erysipelatoclostridium	g	0.000877395	0.00348834	0	0.0419274
Erysipelothrix	g	2.65748e-05	0.000295769	0	0.0053705
Faecalicoccus	g	4.17215e-05	0.000520164	0	0.0093771
Faecalitalea	g	3.78081e-05	0.000361723	0	0.0055588
Holdemanella	g	0.000230095	0.0017801	0	0.0318726
Holdemania	g	0.000134743	0.000261056	0	0.0025682
Massiliomicrobiota	g	8.84777e-07	8.97848e-06	0	0.000128
Solobacterium	g	4.13701e-06	5.11303e-05	0	0.0009754
Turicibacter	g	0.000253882	0.00149756	0	0.0195379
Firmicutes_unclassified	g	0.00211009	0.00588193	0	0.055791
Acidaminococcus	g	0.00015612	0.00183184	0	0.0280397
Phascolarctobacterium	g	0.00515352	0.00741201	0	0.0717801
Megamonas	g	0.00963915	0.0340975	0	0.390261
Mitsuokella	g	0.000237286	0.00167957	0	0.0222639
Selenomonas	g	3.3937e-07	4.89409e-06	0	9.12e-05
Allisonella	g	1.88906e-05	8.07167e-05	0	0.0008394
Anaeroglobus	g	1.08549e-05	0.000106462	0	0.0015494
Dialister	g	0.00492874	0.012815	0	0.0831154
Megasphaera	g	0.000325568	0.0024104	0	0.0386687
Negativicoccus	g	3.44278e-06	6.59148e-05	0	0.0012882
Veillonella	g	0.00332288	0.0157283	0	0.221496
Anaerococcus	g	5.22499e-05	0.000617379	0	0.0098632
Finegoldia	g	4.61244e-05	0.000591336	0	0.0092737
Parvimonas	g	5.87428e-06	3.81482e-05	0	0.0005412
Peptoniphilus	g	0.000122528	0.00135512	0	0.0193604
Tissierellia_unclassified	g	3.04436e-06	4.37011e-05	0	0.0008229
Fusobacterium	g	0.00442268	0.0211242	0	0.290156
Leptotrichia	g	5.66404e-07	7.38914e-06	0	0.0001302
Victivallis	g	5.90357e-05	0.000404289	0	0.0055071
Agrobacterium	g	1.44331e-06	2.48869e-05	0	0.0004818
Lautropia	g	2.86168e-06	2.51371e-05	0	0.0004493
Comamonas	g	8.23052e-05	0.00142799	0	0.0278779
Oxalobacter	g	5.62496e-05	0.000237257	0	0.0024059
Parasutterella	g	0.00479892	0.00899829	0	0.0620795
Sutterella	g	0.000507888	0.00361808	0	0.0465425
Turicimonas	g	0.000663223	0.00114555	0	0.0106314
Morococcus	g	1.09711e-07	1.70429e-06	0	3.18e-05
Neisseria	g	2.87759e-05	0.000425267	0	0.0082925
Bilophila	g	0.000563548	0.000779493	0	0.0054361
Desulfovibrio	g	0.000181624	0.00097317	0	0.0117233
Desulfovibrionaceae_unclassified	g	3.21591e-05	0.000194794	0	0.0016772
Campylobacter	g	8.46349e-05	0.000574765	0	0.0075729
Aeromonas	g	1.22808e-06	1.16196e-05	0	0.0001359
Anaerobiospirillum	g	9.11811e-07	1.46139e-05	0	0.000277
Succinatimonas	g	2.14887e-05	0.000289313	0	0.0054049
Cardiobacterium	g	1.93438e-07	1.83639e-06	0	2.46e-05
Plesiomonas	g	8.22257e-06	0.000133524	0	0.0025832
Atlantibacter	g	3.5958e-08	7.00951e-07	0	1.37e-05
Citrobacter	g	0.000483198	0.00245172	0	0.0347617
Cronobacter	g	2.30866e-06	3.02171e-05	0	0.0004961
Enterobacter	g	0.000462472	0.004061	0	0.0691139
Escherichia	g	0.0211546	0.0524387	0	0.415928	Y
Klebsiella	g	0.00710409	0.0303015	0	0.35907
Kluyvera	g	0.000208192	0.00375128	0	0.0732993
Kosakonia	g	1.43045e-07	1.74489e-06	0	3.02e-05
Leclercia	g	1.87291e-05	0.00028128	0	0.0054331
Pluralibacter	g	1.75144e-06	1.91745e-05	0	0.0002768
Raoultella	g	3.13541e-05	0.000371603	0	0.0071128
Salmonella	g	1.05276e-06	2.0262e-05	0	0.000396
Hafnia	g	2.15223e-06	2.55247e-05	0	0.0004575
Morganella	g	3.1757e-05	0.000401158	0	0.0071162
Proteus	g	4.51604e-05	0.000463865	0	0.007666
Providencia	g	5.3601e-06	8.25476e-05	0	0.0015821
Serratia	g	8.3727e-08	9.64432e-07	0	1.4e-05
Aggregatibacter	g	1.24761e-05	6.64216e-05	0	0.0010027
Haemophilus	g	0.00112116	0.00359871	0	0.037044
Acinetobacter	g	1.58349e-05	0.000301365	0	0.0058898
Pseudomonas	g	2.1147e-06	8.9534e-06	0	7.82e-05
Proteobacteria_unclassified	g	0.00616804	0.0121599	0	0.103899
Cloacibacillus	g	1.86572e-05	7.82122e-05	0	0.0010482
Fretibacterium	g	3.0315e-07	1.41051e-06	0	1.42e-05
Pyramidobacter	g	3.36921e-05	0.000215122	0	0.0031611
Akkermansia	g	0.00191026	0.012756	0	0.202695
Aspergillus	g	3.5958e-08	7.00951e-07	0	1.37e-05
Saccharomyces	g	4.21969e-06	2.62363e-05	0	0.0002465
Blastocystis	g	1.74436e-06	3.40038e-05	0	0.0006646
Microbacterium	g	1.2336e-08	2.40472e-07	0	4.7e-06
Pseudopropionibacterium	g	4.46194e-09	8.69793e-08	0	1.7e-06
Bacteroidales_unclassified	g	1.69554e-07	3.30521e-06	0	6.46e-05
Chryseobacterium	g	4.97638e-07	9.70075e-06	0	0.0001896
Trichococcus	g	4.52467e-06	8.82021e-05	0	0.0017239
Bavariicoccus	g	7.33071e-07	1.35425e-05	0	0.0002643
Tetragenococcus	g	1.73753e-07	3.38707e-06	0	6.62e-05
Anaerosporobacter	g	8.24147e-08	1.60656e-06	0	3.14e-05
Cellulosilyticum	g	4.42178e-06	8.61965e-05	0	0.0016847
Faecalicatena	g	7.14173e-07	1.14741e-05	0	0.0002205
Criibacterium	g	2.66667e-07	5.19829e-06	0	0.0001016
Veillonellaceae_unclassified	g	4.21811e-06	6.17667e-05	0	0.0010942
Cetobacterium	g	3.87591e-05	0.000755553	0	0.0147672
Sneathia	g	4.26971e-05	0.000822717	0	0.0160793
Brevundimonas	g	5.85879e-06	0.000114209	0	0.0022322
Bosea	g	4.84777e-07	9.45004e-06	0	0.0001847
Shinella	g	3.49081e-08	6.80485e-07	0	1.33e-05
Sphingobium	g	1.62992e-07	3.1773e-06	0	6.21e-05
Sphingomonas	g	9.03412e-07	1.76107e-05	0	0.0003442
Sphingopyxis	g	3.77953e-08	7.36766e-07	0	1.44e-05
Acidovorax	g	1.03727e-06	2.02201e-05	0	0.0003952
Alicycliphilus	g	5.00787e-07	9.76214e-06	0	0.0001908
Eikenella	g	6.92913e-08	1.35074e-06	0	2.64e-05
Arcobacter	g	3.68241e-07	7.10181e-06	0	0.0001388
Pseudocitrobacter	g	4.4336e-06	7.0364e-05	0	0.0013642
Edwardsiella	g	1.41071e-05	0.000274194	0	0.0053591
Stenotrophomonas	g	9.66667e-07	1.88438e-05	0	0.0003683
Mycoplasma	g	3.73228e-07	7.27556e-06	0	0.0001422
Euryarchaeota	p	1.64102e-05	0.000137948	0	0.0018882
Actinobacteria	p	0.00762089	0.0153039	0	0.24196
Bacteroidetes	p	0.63071	0.186085	0.0008482	0.940121
Cyanobacteria	p	1.31234e-09	2.55821e-08	0	5e-07
Firmicutes	p	0.311183	0.175736	0.0268402	0.966802
Fusobacteria	p	0.0045047	0.0211452	0	0.290156
Lentisphaerae	p	5.90357e-05	0.000404289	0	0.0055071
Proteobacteria	p	0.0439368	0.0677714	0.0003491	0.562216
Synergistetes	p	5.26528e-05	0.000228654	0	0.0031611
Verrucomicrobia	p	0.00191026	0.012756	0	0.202695
Ascomycota	p	4.25564e-06	2.62399e-05	0	0.0002465
Eukaryota_unclassified	p	1.74436e-06	3.40038e-05	0	0.0006646
Tenericutes	p	3.73228e-07	7.27556e-06	0	0.0001422

## Sheet: Table S2
Table S2. Variations in Each Species Explained by Personal Characteristics
Species	region	sex	age	height	weight	BMI	Sum	Category
Citrobacter_youngae	0.0610129	0*	0.0486635	0	0	0	0.109676	region
Blautia_sp_CAG_257	0.0580154	0	0	0	0	0	0.0580154	region
Citrobacter_freundii	0.0520669	0	0.0424713	0	0	0	0.0945382	region
Citrobacter_portucalensis	0.0455393	0	0.0402785	0	0	0	0.0858179	region
Flavonifractor_plautii	0.0381068	0	0	0	0	0	0.0381068	region
Clostridium_bolteae_CAG_59	0.035707	0	0	0	0	0	0.035707	region
Bacteroides_stercoris	0.0333578	0	0	0	0	0	0.0333578	region
Lachnospira_pectinoschiza	0.0299703	0	0	0	0	0	0.0299703	region
Clostridium_lavalense	0.0295549	0	0	0	0	0	0.0295549	region
Escherichia_coli	0.0278259	0	0	0	0	0	0.0278259	region
Clostridium_symbiosum	0.0276473	0	0	0	0	0	0.0276473	region
Lactobacillus_rogosae	0.0254016	0	0	0	0	0	0.0254016	region
Clostridium_bolteae	0.0207544	0	0	0	0	0	0.0207544	region
Klebsiella_quasipneumoniae	0.0195977	0	0	0	0	0	0.0195977	region
Clostridium_innocuum	0.0190569	0	0	0	0	0	0.0190569	region
Bacteroides_clarus	0.0169123	0	0	0	0	0	0.0169123	region
Clostridium_sp_CAG_58	0.0165736	0	0	0	0	0	0.0165736	region
Gordonibacter_pamelaeae	0.0258111	0.0654809	0	0	0.0329994	0.0298308	0.154122	sex
Sellimonas_intestinalis	0	0.0428983	0	0	0	0	0.0428983	sex
Streptococcus_parasanguinis	0	0.0408352	0	0	0	0	0.0408352	sex
Veillonella_infantium	0	0.037899	0	0	0.0378509	0	0.07575	sex
Lawsonibacter_asaccharolyticus	0	0.035633	0	0	0	0	0.035633	sex
Eggerthella_lenta	0	0.0325493	0	0	0	0	0.0325493	sex
Alistipes_indistinctus	0	0.0275126	0	0	0	0	0.0275126	sex
Anaerotruncus_colihominis	0	0.0271825	0	0	0.0262646	0	0.0534471	sex
Veillonella_dispar	0	0.0267942	0	0	0.022797	0	0.0495912	sex
Bifidobacterium_bifidum	0	0.0261271	0	0	0	0	0.0261271	sex
Eubacterium_sp_CAG_274	0	0.0222858	0	0	0	0	0.0222858	sex
Firmicutes_bacterium_CAG_95	0	0.0214313	0	0	0	0	0.0214313	sex
Veillonella_sp_T11011_6	0	0.0182113	0	0	0	0	0.0182113	sex
Adlercreutzia_equolifaciens	0	0.0169188	0	0	0	0	0.0169188	sex
Akkermansia_muciniphila	0	0.0166789	0	0	0	0	0.0166789	sex
Intestinimonas_butyriciproducens	0	0.0161974	0	0	0	0	0.0161974	sex
Clostridium_leptum	0	0.0141765	0	0	0	0	0.0141765	sex
Streptococcus_thermophilus	0.0396541	0	0.0591198	0	0	0	0.098774	age
Dialister_invisus	0	0.0299778	0.0351788	0	0	0	0.0651566	age
Bacteroides_plebeius	0	0	0.0319058	0	0	0	0.0319058	age
Ruminococcus_torques	0	0	0.0316224	0	0	0	0.0316224	age
Enterobacter_cloacae_complex	0	0	0.0313818	0	0	0	0.0313818	age
Clostridium_sp_CAG_299	0	0	0.0305418	0	0	0	0.0305418	age
Tyzzerella_nexilis	0	0	0.0216789	0	0	0	0.0216789	age
Dorea_longicatena	0	0	0.0216099	0	0	0	0.0216099	age
Bacteroides_coprocola	0	0	0.0212681	0	0	0	0.0212681	age
Faecalibacterium_prausnitzii	0	0	0.0199228	0	0	0	0.0199228	age
Eubacterium_ramulus	0	0	0.0189687	0	0	0	0.0189687	age
Bifidobacterium_adolescentis	0	0	0.0184885	0	0	0	0.0184885	age
Proteobacteria_bacterium_CAG_139	0	0	0.0183868	0	0	0	0.0183868	age
Ruthenibacterium_lactatiformans	0.0297784	0.0151455	0	0	0.0281469	0.0332453	0.106316	BMI
Bifidobacterium_longum	0	0.0235382	0	0	0	0.0296479	0.0531862	BMI
Clostridium_citroniae	0	0.0167881	0	0	0	0.0203673	0.0371555	BMI
Firmicutes_bacterium_CAG_83	0	0	0	0	0.0196465	0.0297342	0.0493808	BMI
Alistipes_putredinis	0	0	0	0	0	0.0263645	0.0263645	BMI
Holdemania_filiformis	0	0	0	0	0.0230097	0.0243461	0.0473558	BMI
Absiella_dolichum	0	0.0197264	0	0.0444402	0	0	0.0641666	height
Eubacterium_dolichum_CAG_375	0	0	0	0.0454816	0	0	0.0454816	height
Haemophilus_parainfluenzae	0	0.0654594	0.0655076	0	0.0882093	0.0765318	0.295708	weight
Prevotella_disiens	0	0.0161284	0	0	0.023979	0	0.0401074	weight
Megamonas_hypermegale	0	0	0	0	0.0223542	0	0.0223542	weight
Hungatella_hathewayi	0	0	0	0	0.0188289	0	0.0188289	weight
* 0 indicated that FDRF-test > 0.05. Only species with cumulative R2 of host factors > 1% were shown. Abbreviation: BMI: body mass index

## Sheet: Table S3
Table S3. Alpha-diversity based on the species of populations
Sample	Shannon	Simpson	Richness
S1	3.01461	0.92629	91
S2	2.76876	0.889091	92
S3	2.85154	0.87469	123
S4	1.38383	0.522751	78
S5	2.56737	0.872495	115
S6	3.07826	0.926555	126
S7	2.14815	0.746273	92
S8	1.35311	0.492167	63
S9	2.56487	0.86426	102
S10	2.95442	0.91204	125
S11	2.85645	0.890955	112
S12	2.46576	0.840749	89
S13	2.37002	0.769836	132
S14	2.82088	0.904215	102
S15	2.69697	0.877951	104
S16	2.28957	0.852053	109
S17	3.21746	0.934648	121
S18	2.63704	0.873796	104
S19	3.05705	0.896936	129
S20	2.94647	0.900209	118
S21	2.90158	0.865474	157
S22	2.63186	0.860329	123
S23	0.977585	0.342307	75
S24	2.68851	0.889899	98
S25	2.56453	0.885925	55
S26	2.77219	0.886554	108
S27	3.00873	0.931946	88
S28	2.60975	0.864561	88
S29	2.57949	0.829868	127
S30	1.24957	0.491795	57
S31	2.13563	0.826825	66
S32	1.83648	0.656887	85
S33	2.63507	0.878017	107
S34	2.67411	0.900877	110
S35	2.59593	0.886142	79
S36	2.23091	0.788211	125
S37	3.34534	0.944278	120
S38	1.58937	0.581472	89
S39	2.82648	0.896081	109
S40	2.59941	0.870003	94
S41	2.07709	0.677666	129
S42	2.79315	0.89167	114
S43	2.99521	0.914806	134
S44	2.87067	0.918527	98
S45	1.68344	0.742925	69
S46	2.04247	0.77689	92
S47	2.80931	0.902865	99
S48	2.63476	0.853359	99
S49	2.43841	0.856916	107
S50	0.660418	0.211955	74
S51	2.20202	0.714337	131
S52	2.28634	0.800595	76
S53	1.89645	0.736567	74
S54	1.90394	0.642132	110
S55	1.72612	0.701785	59
S56	3.11944	0.906277	115
S57	2.56983	0.872728	104
S58	2.42964	0.846202	93
S59	2.23543	0.79305	88
S60	2.0113	0.792105	61
S61	1.6724	0.723484	57
S62	1.57215	0.672589	64
S63	2.86461	0.869217	106
S64	1.98174	0.728889	91
S65	3.23387	0.93223	97
S66	2.09145	0.799603	58
S67	2.68408	0.870486	95
S68	2.2203	0.83685	68
S69	2.34765	0.83262	90
S70	2.66085	0.871865	91
S71	2.6869	0.899168	109
S72	2.0559	0.717511	118
S73	3.08479	0.937398	88
S74	2.35089	0.827907	69
S75	2.71071	0.880745	108
S76	1.68972	0.563132	103
S77	2.10821	0.702377	121
S78	2.47294	0.827278	95
S79	0.966213	0.305266	89
S80	2.28264	0.801968	89
S81	1.88724	0.657792	99
S82	2.63044	0.834708	99
S83	2.04658	0.806472	77
S84	1.88232	0.718211	57
S85	2.39807	0.815132	78
S86	2.22365	0.807503	72
S87	2.75338	0.868028	120
S88	2.61906	0.88469	101
S89	1.54585	0.510425	103
S90	3.26756	0.941323	127
S91	2.58399	0.869542	92
S92	3.12339	0.925964	99
S93	3.24189	0.93511	113
S94	3.04049	0.932617	118
S95	2.32946	0.84663	63
S96	1.98112	0.683346	102
S97	1.46308	0.602687	55
S98	1.93905	0.808055	54
S99	1.22254	0.486232	87
S100	1.88859	0.669518	56
S101	3.23392	0.936935	89
S102	2.45867	0.863651	87
S103	2.29348	0.819683	74
S104	2.42783	0.836616	86
S105	1.45037	0.638819	62
S106	1.63862	0.652805	60
S107	1.76742	0.635233	73
S108	1.14669	0.436341	79
S109	2.45686	0.884658	81
S110	1.76851	0.646518	58
S111	2.64218	0.897068	74
S112	2.36402	0.824277	112
S113	2.73636	0.894295	92
S114	1.12241	0.386232	85
S115	2.72338	0.875346	97
S116	1.76919	0.692751	58
S117	2.61441	0.883316	84
S118	2.83853	0.909302	91
S119	0.477531	0.145874	54
S120	2.84829	0.906769	99
S121	2.00871	0.703886	89
S122	2.66813	0.855508	118
S123	2.91539	0.918192	121
S124	2.77998	0.915106	75
S125	2.53013	0.792892	121
S126	2.66219	0.835823	85
S127	2.56088	0.840296	98
S128	2.34964	0.85466	84
S129	1.62535	0.694226	63
S130	2.74276	0.880078	103
S131	2.16474	0.836163	78
S132	1.99531	0.723776	75
S133	2.12611	0.750115	82
S134	2.2785	0.822209	103
S135	2.38786	0.851327	63
S136	2.29925	0.834411	72
S137	2.81518	0.895658	96
S138	2.46416	0.866128	85
S139	2.73761	0.892193	123
S140	2.29877	0.822875	65
S141	2.25997	0.813083	96
S142	2.93181	0.866746	133
S143	2.48982	0.838639	107
S144	2.41125	0.84684	96
S145	2.46266	0.864829	79
S146	1.9503	0.757956	76
S147	1.55204	0.704777	45
S148	2.40139	0.843372	87
S149	2.11655	0.698167	98
S150	2.20922	0.756458	75
S151	1.78089	0.658877	67
S152	2.53551	0.827873	93
S153	1.37396	0.420773	107
S154	2.07258	0.713711	109
S155	2.67788	0.873779	104
S156	2.42731	0.843249	64
S157	1.93228	0.752796	46
S158	1.87073	0.723354	54
S159	2.47	0.842341	83
S160	2.42271	0.811948	104
S161	2.33553	0.859321	58
S162	2.17976	0.773666	76
S163	2.29931	0.799964	93
S164	2.72017	0.881408	123
S165	2.13149	0.832706	45
S166	2.01982	0.693589	104
S167	2.00726	0.727446	91
S168	2.11762	0.767661	93
S169	2.78603	0.892122	95
S170	2.61307	0.862998	96
S171	1.98262	0.669226	121
S172	1.21397	0.60292	79
S173	1.3525	0.480105	106
S174	1.4384	0.503711	90
S175	2.28987	0.850545	53
S176	2.59397	0.822986	91
S177	0.7799	0.282215	71
S178	2.26596	0.788394	111
S179	0.730231	0.271445	84
S180	2.50285	0.846184	143
S181	2.32987	0.814726	138
S182	2.81022	0.913343	100
S183	2.05093	0.787447	69
S184	2.85468	0.885633	127
S185	2.34268	0.828604	93
S186	2.89704	0.903729	110
S187	1.25507	0.414048	95
S188	2.19995	0.79047	88
S189	3.5357	0.954121	116
S190	3.0038	0.923318	125
S191	2.17699	0.731161	97
S192	2.93069	0.898132	131
S193	2.23236	0.816151	76
S194	2.50756	0.836261	105
S195	3.03568	0.906143	126
S196	3.19228	0.925032	138
S197	2.57206	0.888878	94
W1	1.69376	0.602032	112
W2	2.75873	0.897692	77
W3	2.06217	0.7755	82
W4	2.28412	0.822954	71
W5	2.33993	0.841532	96
W6	2.80718	0.902938	109
W7	2.69129	0.88054	133
W8	3.18758	0.941474	110
W9	3.23682	0.931988	111
W10	2.47107	0.887605	53
W11	2.55905	0.860757	88
W12	1.44206	0.601636	70
W13	2.49446	0.841823	100
W14	2.97147	0.914966	107
W15	2.81253	0.887053	149
W16	2.35204	0.807512	84
W17	1.57031	0.599259	115
W18	2.83499	0.907784	138
W19	1.96728	0.702425	78
W20	2.61829	0.784534	121
W21	2.49733	0.840564	111
W22	2.40195	0.839861	100
W23	2.4804	0.845134	88
W24	1.87903	0.730109	76
W25	1.8534	0.690098	51
W26	2.47614	0.837327	98
W27	3.11834	0.924041	121
W28	2.05353	0.80805	79
W29	3.10586	0.913346	160
W30	2.66026	0.869883	95
W31	1.58744	0.562383	110
W32	2.53483	0.846334	83
W33	2.68212	0.857543	148
W34	2.37751	0.83842	84
W35	2.70475	0.891202	100
W36	1.16525	0.40098	86
W37	2.6142	0.871394	80
W38	1.75842	0.705231	59
W39	2.76624	0.900809	99
W40	1.96125	0.718413	60
W41	1.94208	0.717362	76
W42	3.01382	0.913721	97
W43	2.53997	0.86696	78
W44	2.84498	0.903303	128
W45	2.22045	0.774253	72
W46	3.07773	0.912046	139
W47	2.77098	0.896814	110
W48	3.24943	0.931787	128
W49	2.42887	0.853374	97
W50	2.01523	0.700754	112
W51	1.57049	0.57895	89
W52	1.94506	0.759212	88
W53	2.84687	0.89543	122
W54	2.46231	0.849609	92
W55	1.61004	0.649872	81
W56	2.06424	0.780506	63
W57	2.195	0.802712	84
W58	2.5415	0.791195	92
W59	2.43079	0.839822	82
W60	3.01669	0.908362	126
W61	1.61262	0.576704	101
W62	2.99079	0.88603	117
W63	2.80953	0.903298	103
W64	2.4511	0.862233	89
W65	1.96256	0.667531	93
W66	2.39919	0.836931	93
W67	2.79906	0.909354	79
W68	2.79981	0.877331	145
W69	2.86301	0.899338	129
W70	2.35539	0.840393	93
W71	3.03399	0.904454	116
W72	2.48488	0.821356	119
W73	1.9035	0.706991	67
W74	2.53879	0.830618	108
W75	3.12092	0.926352	115
W76	3.18639	0.933041	133
W77	2.31683	0.830879	106
W78	2.00213	0.737106	86
W79	3.17761	0.933078	135
W80	2.9325	0.908778	134
W81	2.66157	0.868945	81
W82	1.02152	0.361769	63
W83	1.35542	0.460753	90
W84	2.64979	0.888392	93
W85	2.16577	0.834391	66
W86	3.13929	0.928579	139
W87	3.11338	0.928754	101
W88	2.61064	0.835966	91
W89	3.35332	0.949649	109
W90	2.18864	0.812688	67
W91	2.08107	0.737462	102
W92	2.8687	0.892102	115
W93	2.76899	0.886812	104
W94	2.13002	0.822829	75
W95	2.3323	0.843011	50
W96	2.45654	0.870435	103
W97	2.58142	0.848747	107
W98	2.19831	0.824058	77
W99	3.40936	0.945204	157
W100	1.98028	0.797684	88
W101	2.84035	0.890957	132
W102	2.02808	0.747223	62
W103	1.94984	0.684104	81
W104	3.03775	0.900402	130
W105	1.73626	0.711187	57
W106	2.44855	0.842152	119
W107	2.40254	0.804961	93
W108	2.23534	0.79835	86
W109	3.05724	0.909028	123
W110	2.62068	0.894772	74
W111	2.93483	0.902823	96
W112	2.22937	0.776803	118
W113	3.42787	0.947778	177
W114	2.83639	0.911871	94
W115	2.6341	0.877036	94
W116	1.97056	0.710531	57
W117	0.79226	0.281721	75
W118	3.13264	0.93154	105
W119	2.70396	0.880855	108
W120	2.05989	0.728733	65
W121	2.90446	0.900219	112
W122	3.35755	0.950852	109
W123	2.38577	0.815455	103
W124	3.12713	0.929679	132
W125	2.18927	0.81998	76
W126	2.26617	0.806187	80
W127	2.61707	0.869859	90
W128	2.48036	0.829479	69
W129	2.04712	0.813299	57
W130	1.55279	0.574133	34
W131	2.80768	0.876477	120
W132	2.90119	0.894817	98
W133	3.1646	0.933638	126
W134	2.72591	0.877675	118
W135	1.45627	0.599541	57
W136	2.92693	0.912155	95
W137	3.0774	0.882698	103
W138	1.98003	0.760786	95
W139	3.0042	0.900007	125
W140	2.25469	0.734377	99
W141	3.22763	0.919061	140
W142	3.22574	0.936493	134
W143	2.9298	0.906052	146
W144	2.72882	0.901759	80
W145	1.54508	0.533223	82
W146	2.66648	0.874308	108
W147	2.38386	0.799728	81
W148	2.71626	0.877744	106
W149	2.38439	0.766641	122
W150	1.87251	0.695856	62
W151	3.05099	0.863409	130
W152	2.21173	0.782241	99
W153	3.12054	0.914507	121
W154	2.46643	0.848626	90
W155	3.03597	0.927082	100
W156	2.91382	0.906077	111
W157	2.50247	0.870978	88
W158	2.24639	0.829107	73
W159	2.52144	0.823147	124
W160	2.33391	0.836032	87
W161	2.92528	0.897431	121
W162	3.16252	0.925242	99
W163	2.72459	0.886773	109
W164	1.12166	0.406581	60
W165	2.48054	0.864381	80
W166	2.7301	0.898953	111
W167	2.38045	0.795428	95
W168	3.17209	0.934693	132
W169	2.65722	0.880373	100
W170	1.92653	0.727888	54
W171	3.08063	0.915637	130
W172	2.70705	0.90517	76
W173	2.35384	0.833032	84
W174	3.59111	0.951533	193
W175	2.2837	0.813654	67
W176	3.01734	0.906635	122
W177	2.79095	0.884172	109
W178	2.30959	0.822843	85
W179	2.40455	0.796936	87
W180	2.14241	0.694332	120
W181	2.85637	0.881318	123
W182	2.47071	0.860803	95
W183	3.40874	0.94981	127
W184	2.56046	0.86445	98

## Sheet: Table S4
Table S4. Bray-Curtis distance based on the species of populations
	W1	W2	W3	W4	W5	W6	W7	W8	W9	W10	W11	W12	W13	W14	W15	W16	W17	W18	W19	W20	W21	W22	W23	W24	W25	W26	W27	W28	W29	W30	W31	W32	W33	W34	W35	W36	W37	W38	W39	W40	W41	W42	W43	W44	W45	W46	W47	W48	W49
W1	0	0.798	0.911	0.904	0.823	0.83	0.782	0.703	0.844	0.735	0.905	0.366	0.825	0.721	0.787	0.91	0.974	0.817	0.816	0.374	0.809	0.762	0.925	0.993	0.886	0.839	0.808	0.815	0.78	0.86	0.254	0.828	0.826	0.903	0.832	0.235	0.85	0.911	0.815	0.81	0.882	0.81	0.828	0.831	0.92	0.799	0.839	0.734	0.854
W2	0.798	0	0.626	0.649	0.693	0.58	0.588	0.638	0.724	0.823	0.63	0.977	0.819	0.512	0.626	0.682	0.943	0.724	0.851	0.82	0.578	0.484	0.747	0.984	0.707	0.593	0.606	0.45	0.776	0.563	0.769	0.49	0.647	0.676	0.654	0.864	0.509	0.686	0.648	0.622	0.612	0.801	0.483	0.686	0.656	0.657	0.664	0.645	0.764
W3	0.911	0.626	0	0.534	0.652	0.447	0.796	0.808	0.679	0.835	0.589	0.979	0.901	0.649	0.809	0.5	0.967	0.793	0.906	0.859	0.682	0.588	0.886	0.98	0.939	0.545	0.593	0.545	0.802	0.544	0.962	0.586	0.619	0.666	0.699	0.91	0.596	0.661	0.581	0.499	0.499	0.879	0.561	0.729	0.479	0.734	0.916	0.79	0.852
W4	0.904	0.649	0.534	0	0.579	0.616	0.773	0.775	0.774	0.851	0.285	0.928	0.808	0.715	0.745	0.43	0.887	0.753	0.833	0.833	0.69	0.637	0.813	0.89	0.832	0.516	0.69	0.621	0.691	0.416	0.955	0.535	0.614	0.39	0.567	0.918	0.445	0.641	0.686	0.618	0.352	0.649	0.492	0.752	0.45	0.462	0.851	0.742	0.864
W5	0.823	0.693	0.652	0.579	0	0.648	0.522	0.631	0.584	0.893	0.491	0.965	0.598	0.511	0.464	0.72	0.937	0.644	0.74	0.823	0.391	0.71	0.848	0.987	0.892	0.343	0.483	0.561	0.423	0.514	0.906	0.665	0.632	0.577	0.425	0.864	0.422	0.758	0.433	0.611	0.537	0.496	0.42	0.549	0.674	0.548	0.86	0.59	0.816
W6	0.83	0.58	0.447	0.616	0.648	0	0.695	0.672	0.588	0.793	0.664	0.96	0.813	0.547	0.754	0.656	0.96	0.754	0.834	0.799	0.636	0.614	0.827	0.95	0.792	0.608	0.521	0.581	0.742	0.575	0.916	0.668	0.731	0.735	0.657	0.862	0.645	0.782	0.539	0.69	0.673	0.781	0.618	0.627	0.657	0.672	0.87	0.634	0.829
W7	0.782	0.588	0.796	0.773	0.522	0.695	0	0.573	0.646	0.852	0.745	0.962	0.591	0.524	0.369	0.799	0.954	0.643	0.499	0.708	0.482	0.667	0.843	0.988	0.755	0.528	0.594	0.639	0.579	0.688	0.786	0.591	0.739	0.779	0.474	0.832	0.535	0.613	0.618	0.689	0.773	0.6	0.509	0.414	0.821	0.644	0.791	0.442	0.56
W8	0.703	0.638	0.808	0.775	0.631	0.672	0.573	0	0.579	0.802	0.682	0.897	0.732	0.489	0.679	0.774	0.955	0.714	0.745	0.664	0.568	0.681	0.846	0.99	0.795	0.683	0.523	0.693	0.611	0.744	0.787	0.64	0.735	0.783	0.639	0.732	0.641	0.815	0.602	0.697	0.797	0.593	0.631	0.654	0.776	0.664	0.818	0.432	0.771
W9	0.844	0.724	0.679	0.774	0.584	0.588	0.646	0.579	0	0.825	0.725	0.941	0.817	0.535	0.662	0.769	0.94	0.697	0.817	0.731	0.6	0.73	0.785	0.953	0.787	0.628	0.446	0.59	0.543	0.703	0.881	0.684	0.739	0.792	0.57	0.858	0.606	0.82	0.494	0.656	0.758	0.598	0.581	0.677	0.715	0.621	0.807	0.581	0.744
W10	0.735	0.823	0.835	0.851	0.893	0.793	0.852	0.802	0.825	0	0.775	0.696	0.877	0.83	0.852	0.918	0.961	0.938	0.977	0.677	0.921	0.983	0.917	0.891	0.898	0.851	0.853	0.794	0.854	0.8	0.692	0.873	0.962	0.882	0.86	0.745	0.786	0.943	0.804	0.899	0.861	0.836	0.776	0.832	0.787	0.917	0.899	0.848	0.956
W11	0.905	0.63	0.589	0.285	0.491	0.664	0.745	0.682	0.725	0.775	0	0.921	0.767	0.66	0.68	0.536	0.848	0.761	0.811	0.852	0.634	0.69	0.807	0.921	0.892	0.489	0.642	0.598	0.618	0.392	0.96	0.562	0.608	0.362	0.447	0.903	0.425	0.649	0.574	0.635	0.371	0.604	0.428	0.665	0.503	0.489	0.836	0.665	0.852
W12	0.366	0.977	0.979	0.928	0.965	0.96	0.962	0.897	0.941	0.696	0.921	0	0.894	0.967	0.902	0.933	0.924	0.84	0.93	0.496	0.946	0.974	0.941	0.88	0.94	0.927	0.964	0.971	0.937	0.972	0.374	0.916	0.951	0.924	0.964	0.376	0.964	0.904	0.937	0.971	0.967	0.775	0.961	0.95	0.864	0.929	0.904	0.892	0.954
W13	0.825	0.819	0.901	0.808	0.598	0.813	0.591	0.732	0.817	0.877	0.767	0.894	0	0.777	0.556	0.846	0.904	0.655	0.714	0.846	0.579	0.802	0.801	0.926	0.744	0.527	0.734	0.827	0.676	0.794	0.891	0.739	0.806	0.83	0.734	0.877	0.713	0.915	0.678	0.799	0.855	0.646	0.682	0.717	0.895	0.698	0.723	0.738	0.876
W14	0.721	0.512	0.649	0.715	0.511	0.547	0.524	0.489	0.535	0.83	0.66	0.967	0.777	0	0.603	0.732	0.97	0.728	0.771	0.708	0.56	0.602	0.884	0.994	0.773	0.579	0.459	0.458	0.578	0.631	0.828	0.514	0.642	0.696	0.542	0.805	0.469	0.745	0.466	0.594	0.656	0.642	0.463	0.629	0.702	0.611	0.814	0.552	0.727
W15	0.787	0.626	0.809	0.745	0.464	0.754	0.369	0.679	0.662	0.852	0.68	0.902	0.556	0.603	0	0.802	0.889	0.625	0.599	0.707	0.525	0.667	0.837	0.926	0.871	0.478	0.636	0.609	0.556	0.673	0.837	0.692	0.727	0.699	0.473	0.862	0.545	0.707	0.6	0.685	0.707	0.555	0.571	0.458	0.755	0.597	0.67	0.499	0.595
W16	0.91	0.682	0.5	0.43	0.72	0.656	0.799	0.774	0.769	0.918	0.536	0.933	0.846	0.732	0.802	0	0.896	0.705	0.798	0.854	0.654	0.646	0.84	0.905	0.873	0.52	0.698	0.641	0.8	0.614	0.929	0.52	0.596	0.585	0.7	0.888	0.64	0.633	0.672	0.507	0.493	0.859	0.614	0.683	0.492	0.654	0.816	0.739	0.796
W17	0.974	0.943	0.967	0.887	0.937	0.96	0.954	0.955	0.94	0.961	0.848	0.924	0.904	0.97	0.889	0.896	0	0.854	0.931	0.941	0.939	0.965	0.618	0.492	0.442	0.866	0.969	0.966	0.96	0.951	0.959	0.883	0.945	0.906	0.899	0.975	0.958	0.911	0.91	0.946	0.909	0.926	0.969	0.909	0.869	0.83	0.808	0.91	0.945
W18	0.817	0.724	0.793	0.753	0.644	0.754	0.643	0.714	0.697	0.938	0.761	0.84	0.655	0.728	0.625	0.705	0.854	0	0.727	0.822	0.625	0.74	0.847	0.929	0.813	0.541	0.631	0.72	0.703	0.72	0.871	0.596	0.713	0.745	0.703	0.83	0.662	0.671	0.651	0.652	0.77	0.696	0.679	0.619	0.713	0.672	0.752	0.663	0.611
W19	0.816	0.851	0.906	0.833	0.74	0.834	0.499	0.745	0.817	0.977	0.811	0.93	0.714	0.771	0.599	0.798	0.931	0.727	0	0.813	0.692	0.833	0.895	0.973	0.844	0.695	0.748	0.818	0.678	0.797	0.883	0.744	0.729	0.764	0.596	0.834	0.737	0.454	0.774	0.785	0.849	0.717	0.74	0.508	0.903	0.75	0.754	0.589	0.673
W20	0.374	0.82	0.859	0.833	0.823	0.799	0.708	0.664	0.731	0.677	0.852	0.496	0.846	0.708	0.707	0.854	0.941	0.822	0.813	0	0.769	0.811	0.88	0.961	0.866	0.821	0.768	0.819	0.729	0.821	0.371	0.776	0.831	0.844	0.76	0.385	0.749	0.861	0.788	0.807	0.869	0.715	0.767	0.782	0.898	0.738	0.825	0.633	0.789
W21	0.809	0.578	0.682	0.69	0.391	0.636	0.482	0.568	0.6	0.921	0.634	0.946	0.579	0.56	0.525	0.654	0.939	0.625	0.692	0.769	0	0.565	0.794	0.991	0.799	0.382	0.521	0.569	0.603	0.634	0.889	0.55	0.606	0.632	0.543	0.845	0.517	0.704	0.515	0.573	0.69	0.657	0.55	0.505	0.712	0.659	0.768	0.514	0.782
W22	0.762	0.484	0.588	0.637	0.71	0.614	0.667	0.681	0.73	0.983	0.69	0.974	0.802	0.602	0.667	0.646	0.965	0.74	0.833	0.811	0.565	0	0.875	0.966	0.852	0.632	0.668	0.53	0.753	0.654	0.841	0.556	0.602	0.696	0.651	0.871	0.615	0.689	0.692	0.484	0.6	0.798	0.549	0.734	0.636	0.658	0.72	0.683	0.801
W23	0.925	0.747	0.886	0.813	0.848	0.827	0.843	0.846	0.785	0.917	0.807	0.941	0.801	0.884	0.837	0.84	0.618	0.847	0.895	0.88	0.794	0.875	0	0.667	0.577	0.793	0.778	0.878	0.887	0.853	0.844	0.807	0.883	0.919	0.785	0.935	0.792	0.947	0.824	0.875	0.876	0.838	0.81	0.825	0.843	0.681	0.664	0.826	0.853
W24	0.993	0.984	0.98	0.89	0.987	0.95	0.988	0.99	0.953	0.891	0.921	0.88	0.926	0.994	0.926	0.905	0.492	0.929	0.973	0.961	0.991	0.966	0.667	0	0.51	0.906	0.989	0.985	0.986	0.963	0.993	0.941	0.985	0.95	0.982	0.998	0.98	0.987	0.94	0.999	0.981	0.893	0.985	0.992	0.83	0.878	0.838	0.947	0.996
W25	0.886	0.707	0.939	0.832	0.892	0.792	0.755	0.795	0.787	0.898	0.892	0.94	0.744	0.773	0.871	0.873	0.442	0.813	0.844	0.866	0.799	0.852	0.577	0.51	0	0.817	0.806	0.829	0.864	0.901	0.86	0.687	0.9	0.953	0.867	0.912	0.786	0.959	0.824	0.905	0.946	0.834	0.763	0.85	0.89	0.758	0.738	0.8	0.928
W26	0.839	0.593	0.545	0.516	0.343	0.608	0.528	0.683	0.628	0.851	0.489	0.927	0.527	0.579	0.478	0.52	0.866	0.541	0.695	0.821	0.382	0.632	0.793	0.906	0.817	0	0.533	0.475	0.599	0.459	0.907	0.503	0.527	0.575	0.54	0.864	0.448	0.642	0.457	0.512	0.526	0.674	0.412	0.55	0.53	0.565	0.753	0.645	0.8
W27	0.808	0.606	0.593	0.69	0.483	0.521	0.594	0.523	0.446	0.853	0.642	0.964	0.734	0.459	0.636	0.698	0.969	0.631	0.748	0.768	0.521	0.668	0.778	0.989	0.806	0.533	0	0.553	0.499	0.619	0.894	0.619	0.689	0.708	0.533	0.837	0.501	0.774	0.39	0.607	0.672	0.554	0.501	0.541	0.68	0.601	0.829	0.49	0.725
W28	0.815	0.45	0.545	0.621	0.561	0.581	0.639	0.693	0.59	0.794	0.598	0.971	0.827	0.458	0.609	0.641	0.966	0.72	0.818	0.819	0.569	0.53	0.878	0.985	0.829	0.475	0.553	0	0.655	0.586	0.845	0.539	0.618	0.665	0.6	0.888	0.463	0.661	0.527	0.553	0.553	0.748	0.405	0.634	0.587	0.677	0.715	0.672	0.811
W29	0.78	0.776	0.802	0.691	0.423	0.742	0.579	0.611	0.543	0.854	0.618	0.937	0.676	0.578	0.556	0.8	0.96	0.703	0.678	0.729	0.603	0.753	0.887	0.986	0.864	0.599	0.499	0.655	0	0.605	0.846	0.723	0.743	0.626	0.508	0.837	0.487	0.859	0.523	0.739	0.614	0.384	0.51	0.609	0.815	0.518	0.747	0.574	0.798
W30	0.86	0.563	0.544	0.416	0.514	0.575	0.688	0.744	0.703	0.8	0.392	0.972	0.794	0.631	0.673	0.614	0.951	0.72	0.797	0.821	0.634	0.654	0.853	0.963	0.901	0.459	0.619	0.586	0.605	0	0.918	0.591	0.552	0.446	0.473	0.87	0.341	0.692	0.609	0.589	0.401	0.636	0.443	0.578	0.644	0.469	0.857	0.714	0.765
W31	0.254	0.769	0.962	0.955	0.906	0.916	0.786	0.787	0.881	0.692	0.96	0.374	0.891	0.828	0.837	0.929	0.959	0.871	0.883	0.371	0.889	0.841	0.844	0.993	0.86	0.907	0.894	0.845	0.846	0.918	0	0.839	0.895	0.951	0.866	0.263	0.847	0.922	0.913	0.886	0.942	0.87	0.808	0.865	0.974	0.861	0.781	0.804	0.867
W32	0.828	0.49	0.586	0.535	0.665	0.668	0.591	0.64	0.684	0.873	0.562	0.916	0.739	0.514	0.692	0.52	0.883	0.596	0.744	0.776	0.55	0.556	0.807	0.941	0.687	0.503	0.619	0.539	0.723	0.591	0.839	0	0.559	0.563	0.6	0.831	0.481	0.576	0.614	0.497	0.557	0.736	0.419	0.668	0.591	0.59	0.782	0.662	0.757
W33	0.826	0.647	0.619	0.614	0.632	0.731	0.739	0.735	0.739	0.962	0.608	0.951	0.806	0.642	0.727	0.596	0.945	0.713	0.729	0.831	0.606	0.602	0.883	0.985	0.9	0.527	0.689	0.618	0.743	0.552	0.895	0.559	0	0.488	0.648	0.868	0.574	0.665	0.63	0.573	0.591	0.79	0.53	0.657	0.66	0.644	0.763	0.737	0.804
W34	0.903	0.676	0.666	0.39	0.577	0.735	0.779	0.783	0.792	0.882	0.362	0.924	0.83	0.696	0.699	0.585	0.906	0.745	0.764	0.844	0.632	0.696	0.919	0.95	0.953	0.575	0.708	0.665	0.626	0.446	0.951	0.563	0.488	0	0.532	0.905	0.484	0.614	0.703	0.653	0.414	0.627	0.464	0.696	0.646	0.519	0.803	0.703	0.836
W35	0.832	0.654	0.699	0.567	0.425	0.657	0.474	0.639	0.57	0.86	0.447	0.964	0.734	0.542	0.473	0.7	0.899	0.703	0.596	0.76	0.543	0.651	0.785	0.982	0.867	0.54	0.533	0.6	0.508	0.473	0.866	0.6	0.648	0.532	0	0.851	0.345	0.575	0.577	0.585	0.509	0.521	0.393	0.419	0.721	0.461	0.811	0.479	0.572
W36	0.235	0.864	0.91	0.918	0.864	0.862	0.832	0.732	0.858	0.745	0.903	0.376	0.877	0.805	0.862	0.888	0.975	0.83	0.834	0.385	0.845	0.871	0.935	0.998	0.912	0.864	0.837	0.888	0.837	0.87	0.263	0.831	0.868	0.905	0.851	0	0.869	0.905	0.877	0.866	0.908	0.83	0.867	0.84	0.93	0.846	0.905	0.772	0.866
W37	0.85	0.509	0.596	0.445	0.422	0.645	0.535	0.641	0.606	0.786	0.425	0.964	0.713	0.469	0.545	0.64	0.958	0.662	0.737	0.749	0.517	0.615	0.792	0.98	0.786	0.448	0.501	0.463	0.487	0.341	0.847	0.481	0.574	0.484	0.345	0.869	0	0.676	0.543	0.504	0.397	0.509	0.269	0.55	0.624	0.442	0.826	0.647	0.714
W38	0.911	0.686	0.661	0.641	0.758	0.782	0.613	0.815	0.82	0.943	0.649	0.904	0.915	0.745	0.707	0.633	0.911	0.671	0.454	0.861	0.704	0.689	0.947	0.987	0.959	0.642	0.774	0.661	0.859	0.692	0.922	0.576	0.665	0.614	0.575	0.905	0.676	0	0.761	0.625	0.604	0.842	0.638	0.608	0.635	0.781	0.912	0.643	0.62
W39	0.815	0.648	0.581	0.686	0.433	0.539	0.618	0.602	0.494	0.804	0.574	0.937	0.678	0.466	0.6	0.672	0.91	0.651	0.774	0.788	0.515	0.692	0.824	0.94	0.824	0.457	0.39	0.527	0.523	0.609	0.913	0.614	0.63	0.703	0.577	0.877	0.543	0.761	0	0.531	0.694	0.583	0.491	0.559	0.632	0.654	0.787	0.511	0.814
W40	0.81	0.622	0.499	0.618	0.611	0.69	0.689	0.697	0.656	0.899	0.635	0.971	0.799	0.594	0.685	0.507	0.946	0.652	0.785	0.807	0.573	0.484	0.875	0.999	0.905	0.512	0.607	0.553	0.739	0.589	0.886	0.497	0.573	0.653	0.585	0.866	0.504	0.625	0.531	0	0.416	0.757	0.494	0.639	0.502	0.664	0.844	0.68	0.766
W41	0.882	0.612	0.499	0.352	0.537	0.673	0.773	0.797	0.758	0.861	0.371	0.967	0.855	0.656	0.707	0.493	0.909	0.77	0.849	0.869	0.69	0.6	0.876	0.981	0.946	0.526	0.672	0.553	0.614	0.401	0.942	0.557	0.591	0.414	0.509	0.908	0.397	0.604	0.694	0.416	0	0.672	0.453	0.69	0.402	0.485	0.877	0.758	0.813
W42	0.81	0.801	0.879	0.649	0.496	0.781	0.6	0.593	0.598	0.836	0.604	0.775	0.646	0.642	0.555	0.859	0.926	0.696	0.717	0.715	0.657	0.798	0.838	0.893	0.834	0.674	0.554	0.748	0.384	0.636	0.87	0.736	0.79	0.627	0.521	0.83	0.509	0.842	0.583	0.757	0.672	0	0.506	0.703	0.799	0.557	0.768	0.546	0.811
W43	0.828	0.483	0.561	0.492	0.42	0.618	0.509	0.631	0.581	0.776	0.428	0.961	0.682	0.463	0.571	0.614	0.969	0.679	0.74	0.767	0.55	0.549	0.81	0.985	0.763	0.412	0.501	0.405	0.51	0.443	0.808	0.419	0.53	0.464	0.393	0.867	0.269	0.638	0.491	0.494	0.453	0.506	0	0.6	0.596	0.518	0.75	0.613	0.762
W44	0.831	0.686	0.729	0.752	0.549	0.627	0.414	0.654	0.677	0.832	0.665	0.95	0.717	0.629	0.458	0.683	0.909	0.619	0.508	0.782	0.505	0.734	0.825	0.992	0.85	0.55	0.541	0.634	0.609	0.578	0.865	0.668	0.657	0.696	0.419	0.84	0.55	0.608	0.559	0.639	0.69	0.703	0.6	0	0.761	0.636	0.772	0.448	0.577
W45	0.92	0.656	0.479	0.45	0.674	0.657	0.821	0.776	0.715	0.787	0.503	0.864	0.895	0.702	0.755	0.492	0.869	0.713	0.903	0.898	0.712	0.636	0.843	0.83	0.89	0.53	0.68	0.587	0.815	0.644	0.974	0.591	0.66	0.646	0.721	0.93	0.624	0.635	0.632	0.502	0.402	0.799	0.596	0.761	0	0.76	0.906	0.748	0.875
W46	0.799	0.657	0.734	0.462	0.548	0.672	0.644	0.664	0.621	0.917	0.489	0.929	0.698	0.611	0.597	0.654	0.83	0.672	0.75	0.738	0.659	0.658	0.681	0.878	0.758	0.565	0.601	0.677	0.518	0.469	0.861	0.59	0.644	0.519	0.461	0.846	0.442	0.781	0.654	0.664	0.485	0.557	0.518	0.636	0.76	0	0.669	0.636	0.708
W47	0.839	0.664	0.916	0.851	0.86	0.87	0.791	0.818	0.807	0.899	0.836	0.904	0.723	0.814	0.67	0.816	0.808	0.752	0.754	0.825	0.768	0.72	0.664	0.838	0.738	0.753	0.829	0.715	0.747	0.857	0.781	0.782	0.763	0.803	0.811	0.905	0.826	0.912	0.787	0.844	0.877	0.768	0.75	0.772	0.906	0.669	0	0.788	0.868
W48	0.734	0.645	0.79	0.742	0.59	0.634	0.442	0.432	0.581	0.848	0.665	0.892	0.738	0.552	0.499	0.739	0.91	0.663	0.589	0.633	0.514	0.683	0.826	0.947	0.8	0.645	0.49	0.672	0.574	0.714	0.804	0.662	0.737	0.703	0.479	0.772	0.647	0.643	0.511	0.68	0.758	0.546	0.613	0.448	0.748	0.636	0.788	0	0.672
W49	0.854	0.764	0.852	0.864	0.816	0.829	0.56	0.771	0.744	0.956	0.852	0.954	0.876	0.727	0.595	0.796	0.945	0.611	0.673	0.789	0.782	0.801	0.853	0.996	0.928	0.8	0.725	0.811	0.798	0.765	0.867	0.757	0.804	0.836	0.572	0.866	0.714	0.62	0.814	0.766	0.813	0.811	0.762	0.577	0.875	0.708	0.868	0.672	0
W50	0.838	0.855	0.857	0.897	0.672	0.806	0.458	0.748	0.727	0.907	0.855	0.921	0.726	0.734	0.549	0.882	0.958	0.709	0.271	0.762	0.69	0.839	0.9	0.99	0.904	0.672	0.687	0.754	0.656	0.83	0.88	0.809	0.856	0.88	0.592	0.867	0.715	0.419	0.668	0.746	0.841	0.665	0.719	0.513	0.845	0.776	0.847	0.582	0.648
W51	0.284	0.777	0.806	0.748	0.806	0.774	0.829	0.745	0.804	0.704	0.786	0.354	0.908	0.816	0.824	0.805	0.959	0.802	0.895	0.383	0.794	0.842	0.886	0.977	0.914	0.797	0.768	0.81	0.873	0.796	0.322	0.785	0.816	0.801	0.801	0.274	0.762	0.827	0.803	0.812	0.767	0.864	0.793	0.79	0.788	0.773	0.918	0.748	0.864
W52	0.897	0.888	0.943	0.875	0.651	0.893	0.491	0.817	0.839	0.959	0.833	0.932	0.593	0.858	0.484	0.877	0.82	0.706	0.405	0.84	0.663	0.879	0.8	0.932	0.842	0.593	0.816	0.844	0.774	0.865	0.885	0.816	0.857	0.93	0.625	0.925	0.785	0.552	0.734	0.804	0.922	0.778	0.782	0.541	0.901	0.782	0.784	0.646	0.709
W53	0.831	0.632	0.718	0.713	0.575	0.64	0.637	0.546	0.61	0.94	0.712	0.971	0.817	0.492	0.662	0.751	0.969	0.714	0.819	0.756	0.579	0.67	0.872	0.994	0.863	0.624	0.448	0.645	0.641	0.662	0.891	0.658	0.697	0.754	0.623	0.842	0.554	0.77	0.484	0.601	0.728	0.603	0.581	0.637	0.731	0.679	0.845	0.521	0.788
W54	0.823	0.6	0.774	0.778	0.731	0.744	0.548	0.752	0.753	0.944	0.762	0.949	0.857	0.691	0.535	0.685	0.916	0.675	0.57	0.797	0.718	0.684	0.887	0.994	0.904	0.707	0.736	0.606	0.763	0.736	0.836	0.668	0.726	0.743	0.549	0.853	0.723	0.439	0.75	0.696	0.732	0.8	0.701	0.533	0.775	0.663	0.65	0.573	0.543
W55	0.87	0.721	0.774	0.772	0.729	0.758	0.794	0.803	0.777	0.932	0.718	0.893	0.91	0.763	0.749	0.786	0.858	0.724	0.866	0.849	0.726	0.733	0.86	0.914	0.94	0.715	0.747	0.762	0.862	0.73	0.899	0.721	0.726	0.732	0.7	0.892	0.75	0.778	0.759	0.719	0.775	0.791	0.7	0.74	0.745	0.732	0.866	0.699	0.832
W56	0.9	0.846	0.868	0.837	0.852	0.848	0.631	0.846	0.83	0.93	0.842	0.794	0.932	0.857	0.663	0.816	0.922	0.766	0.59	0.856	0.808	0.861	0.95	0.915	0.965	0.826	0.859	0.866	0.846	0.828	0.915	0.819	0.701	0.703	0.696	0.908	0.849	0.625	0.872	0.843	0.844	0.758	0.822	0.594	0.815	0.816	0.81	0.662	0.656
W57	0.844	0.64	0.619	0.354	0.49	0.652	0.69	0.723	0.716	0.881	0.363	0.939	0.738	0.657	0.659	0.603	0.947	0.686	0.776	0.83	0.603	0.599	0.894	0.953	0.858	0.485	0.633	0.539	0.563	0.361	0.92	0.576	0.569	0.395	0.462	0.875	0.38	0.628	0.582	0.567	0.384	0.553	0.36	0.635	0.592	0.5	0.815	0.625	0.815
W58	0.864	0.524	0.465	0.543	0.68	0.633	0.733	0.728	0.695	0.888	0.546	0.956	0.855	0.685	0.737	0.492	0.896	0.707	0.847	0.828	0.616	0.495	0.774	0.964	0.86	0.521	0.62	0.572	0.797	0.539	0.877	0.519	0.572	0.577	0.662	0.878	0.586	0.622	0.656	0.409	0.383	0.794	0.509	0.649	0.456	0.609	0.803	0.661	0.812
W59	0.839	0.622	0.535	0.524	0.469	0.669	0.599	0.698	0.688	0.927	0.509	0.961	0.668	0.636	0.565	0.595	0.908	0.617	0.731	0.796	0.476	0.525	0.831	0.98	0.878	0.41	0.606	0.556	0.638	0.486	0.901	0.531	0.533	0.586	0.492	0.874	0.415	0.654	0.547	0.435	0.498	0.659	0.423	0.557	0.604	0.613	0.839	0.646	0.791
W60	0.815	0.721	0.838	0.767	0.543	0.794	0.315	0.64	0.644	0.873	0.699	0.94	0.71	0.588	0.426	0.812	0.899	0.715	0.433	0.708	0.571	0.784	0.825	0.986	0.838	0.64	0.644	0.696	0.506	0.66	0.81	0.648	0.694	0.691	0.424	0.851	0.525	0.614	0.64	0.696	0.741	0.534	0.547	0.388	0.857	0.618	0.741	0.477	0.569
W61	0.227	0.932	0.971	0.972	0.875	0.925	0.839	0.776	0.869	0.741	0.96	0.371	0.86	0.858	0.842	0.951	0.967	0.859	0.858	0.377	0.857	0.898	0.95	0.996	0.911	0.876	0.86	0.87	0.836	0.927	0.244	0.902	0.93	0.968	0.841	0.283	0.872	0.943	0.87	0.87	0.967	0.84	0.856	0.85	0.987	0.897	0.863	0.803	0.885
W62	0.764	0.615	0.849	0.805	0.695	0.783	0.591	0.634	0.6	0.848	0.765	0.923	0.801	0.543	0.612	0.788	0.935	0.765	0.767	0.704	0.666	0.724	0.849	0.983	0.762	0.718	0.681	0.671	0.587	0.76	0.793	0.568	0.763	0.764	0.637	0.831	0.622	0.834	0.7	0.711	0.769	0.669	0.612	0.708	0.852	0.627	0.77	0.636	0.749
W63	0.793	0.571	0.653	0.531	0.353	0.61	0.574	0.543	0.508	0.83	0.514	0.948	0.742	0.459	0.675	0.699	0.968	0.693	0.743	0.778	0.529	0.664	0.839	0.985	0.781	0.535	0.434	0.549	0.413	0.515	0.851	0.56	0.642	0.578	0.459	0.837	0.39	0.701	0.497	0.649	0.526	0.446	0.386	0.655	0.625	0.552	0.849	0.549	0.798
W64	0.79	0.652	0.819	0.541	0.592	0.647	0.612	0.642	0.715	0.928	0.56	0.929	0.618	0.685	0.634	0.767	0.873	0.679	0.723	0.801	0.668	0.59	0.715	0.898	0.73	0.639	0.695	0.764	0.573	0.555	0.818	0.664	0.741	0.606	0.538	0.845	0.538	0.849	0.685	0.749	0.635	0.539	0.525	0.736	0.81	0.427	0.646	0.688	0.801
W65	0.347	0.885	0.949	0.905	0.778	0.885	0.698	0.76	0.839	0.732	0.89	0.377	0.768	0.835	0.71	0.899	0.928	0.779	0.739	0.389	0.763	0.898	0.865	0.962	0.837	0.759	0.754	0.853	0.754	0.874	0.33	0.847	0.886	0.929	0.784	0.361	0.785	0.899	0.726	0.858	0.937	0.762	0.824	0.707	0.936	0.818	0.811	0.685	0.844
W66	0.862	0.608	0.577	0.451	0.388	0.605	0.665	0.623	0.542	0.852	0.416	0.968	0.814	0.511	0.685	0.66	0.962	0.753	0.789	0.787	0.574	0.696	0.867	0.982	0.863	0.525	0.46	0.525	0.433	0.393	0.885	0.582	0.622	0.457	0.448	0.864	0.367	0.684	0.473	0.648	0.423	0.519	0.406	0.664	0.637	0.488	0.834	0.607	0.797
W67	0.926	0.67	0.688	0.599	0.678	0.538	0.8	0.736	0.621	0.753	0.581	0.879	0.874	0.631	0.711	0.696	0.738	0.747	0.89	0.883	0.768	0.835	0.694	0.735	0.729	0.642	0.624	0.631	0.804	0.698	0.972	0.739	0.801	0.755	0.731	0.929	0.69	0.812	0.601	0.808	0.704	0.784	0.717	0.672	0.541	0.654	0.785	0.672	0.86
W68	0.758	0.758	0.81	0.761	0.562	0.738	0.396	0.67	0.644	0.851	0.736	0.897	0.698	0.6	0.397	0.815	0.93	0.65	0.418	0.714	0.663	0.755	0.874	0.931	0.867	0.608	0.606	0.676	0.514	0.709	0.823	0.724	0.716	0.735	0.476	0.836	0.595	0.549	0.617	0.672	0.695	0.547	0.586	0.45	0.766	0.618	0.77	0.465	0.569
W69	0.805	0.53	0.447	0.617	0.575	0.454	0.656	0.678	0.52	0.792	0.587	0.964	0.816	0.43	0.626	0.604	0.965	0.711	0.822	0.727	0.561	0.581	0.824	0.982	0.871	0.477	0.477	0.455	0.651	0.416	0.882	0.568	0.614	0.664	0.565	0.869	0.449	0.708	0.465	0.499	0.57	0.764	0.492	0.583	0.596	0.564	0.804	0.674	0.695
W70	0.837	0.518	0.613	0.461	0.429	0.677	0.54	0.612	0.664	0.836	0.396	0.957	0.717	0.482	0.567	0.607	0.962	0.686	0.728	0.762	0.545	0.603	0.864	0.974	0.759	0.469	0.562	0.463	0.51	0.456	0.835	0.393	0.58	0.454	0.418	0.86	0.27	0.627	0.555	0.505	0.442	0.52	0.214	0.613	0.621	0.537	0.817	0.599	0.783
W71	0.751	0.663	0.775	0.772	0.545	0.69	0.334	0.565	0.609	0.908	0.753	0.943	0.679	0.509	0.413	0.76	0.955	0.624	0.57	0.618	0.47	0.627	0.88	0.988	0.828	0.568	0.534	0.624	0.522	0.721	0.809	0.612	0.719	0.756	0.454	0.824	0.561	0.616	0.559	0.613	0.743	0.601	0.601	0.388	0.805	0.575	0.769	0.378	0.583
W72	0.773	0.762	0.878	0.872	0.554	0.762	0.389	0.653	0.708	0.964	0.844	0.936	0.538	0.691	0.41	0.806	0.959	0.632	0.521	0.742	0.4	0.684	0.876	0.997	0.846	0.555	0.687	0.786	0.617	0.803	0.826	0.728	0.715	0.768	0.558	0.825	0.703	0.729	0.708	0.692	0.867	0.673	0.684	0.46	0.886	0.685	0.734	0.531	0.638
W73	0.408	0.886	0.961	0.948	0.953	0.953	0.888	0.871	0.907	0.684	0.949	0.392	0.945	0.906	0.783	0.887	0.933	0.808	0.886	0.387	0.931	0.906	0.961	0.929	0.945	0.929	0.951	0.888	0.879	0.938	0.36	0.92	0.926	0.919	0.891	0.429	0.935	0.891	0.96	0.926	0.924	0.874	0.926	0.878	0.916	0.887	0.836	0.82	0.775
W74	0.864	0.599	0.532	0.445	0.635	0.681	0.69	0.732	0.72	0.881	0.492	0.91	0.704	0.66	0.691	0.475	0.847	0.591	0.789	0.831	0.614	0.565	0.771	0.923	0.817	0.441	0.66	0.562	0.748	0.531	0.896	0.278	0.536	0.553	0.591	0.869	0.513	0.537	0.631	0.495	0.443	0.722	0.485	0.689	0.51	0.551	0.771	0.709	0.773
W75	0.828	0.756	0.707	0.718	0.522	0.671	0.484	0.637	0.54	0.86	0.658	0.935	0.759	0.566	0.514	0.759	0.941	0.746	0.572	0.739	0.645	0.808	0.843	0.984	0.873	0.598	0.502	0.662	0.48	0.642	0.886	0.692	0.711	0.663	0.443	0.858	0.602	0.627	0.543	0.745	0.663	0.565	0.572	0.462	0.759	0.6	0.813	0.458	0.611
W76	0.819	0.65	0.737	0.707	0.63	0.659	0.599	0.607	0.513	0.844	0.696	0.906	0.803	0.526	0.59	0.731	0.93	0.68	0.801	0.695	0.539	0.653	0.729	0.926	0.842	0.64	0.478	0.662	0.652	0.625	0.853	0.606	0.715	0.695	0.544	0.856	0.53	0.759	0.609	0.58	0.728	0.614	0.59	0.618	0.707	0.563	0.813	0.562	0.642
W77	0.776	0.668	0.741	0.58	0.264	0.614	0.44	0.585	0.647	0.91	0.536	0.952	0.507	0.542	0.442	0.77	0.973	0.62	0.694	0.768	0.358	0.631	0.883	0.994	0.846	0.402	0.539	0.649	0.421	0.511	0.884	0.651	0.699	0.561	0.444	0.835	0.413	0.79	0.566	0.649	0.55	0.478	0.453	0.565	0.764	0.437	0.827	0.548	0.781
W78	0.767	0.699	0.943	0.953	0.862	0.875	0.738	0.771	0.861	0.952	0.96	0.958	0.825	0.718	0.705	0.934	0.96	0.855	0.789	0.808	0.788	0.729	0.931	0.995	0.845	0.89	0.836	0.725	0.778	0.908	0.82	0.798	0.673	0.925	0.813	0.896	0.833	0.908	0.804	0.83	0.931	0.829	0.822	0.799	0.97	0.823	0.613	0.778	0.834
W79	0.783	0.669	0.766	0.793	0.534	0.64	0.521	0.521	0.481	0.76	0.722	0.868	0.62	0.577	0.56	0.789	0.917	0.591	0.716	0.732	0.482	0.734	0.788	0.913	0.738	0.575	0.523	0.631	0.491	0.736	0.836	0.653	0.786	0.773	0.647	0.832	0.603	0.814	0.515	0.71	0.788	0.486	0.575	0.612	0.701	0.688	0.762	0.48	0.801
W80	0.695	0.693	0.916	0.885	0.799	0.826	0.554	0.625	0.765	0.779	0.857	0.829	0.635	0.653	0.66	0.891	0.918	0.799	0.736	0.603	0.758	0.812	0.878	0.972	0.771	0.843	0.774	0.812	0.736	0.805	0.683	0.659	0.827	0.858	0.72	0.719	0.742	0.799	0.801	0.837	0.894	0.711	0.708	0.706	0.889	0.772	0.844	0.563	0.688
W81	0.962	0.829	0.79	0.689	0.83	0.74	0.866	0.803	0.743	0.802	0.701	0.926	0.819	0.861	0.823	0.729	0.591	0.833	0.882	0.85	0.784	0.961	0.379	0.664	0.586	0.713	0.781	0.843	0.826	0.81	0.945	0.777	0.905	0.845	0.804	0.946	0.797	0.886	0.797	0.867	0.788	0.836	0.822	0.764	0.759	0.681	0.744	0.817	0.914
W82	0.283	0.903	0.921	0.917	0.885	0.894	0.831	0.817	0.874	0.75	0.908	0.368	0.922	0.897	0.829	0.915	0.961	0.888	0.826	0.417	0.891	0.912	0.931	0.991	0.937	0.878	0.884	0.899	0.881	0.9	0.27	0.876	0.887	0.921	0.822	0.127	0.888	0.869	0.891	0.895	0.92	0.883	0.88	0.833	0.932	0.873	0.933	0.799	0.841
W83	0.926	0.7	0.574	0.586	0.775	0.738	0.854	0.851	0.834	0.96	0.646	0.963	0.961	0.776	0.848	0.552	0.906	0.8	0.921	0.888	0.726	0.614	0.947	0.933	0.951	0.66	0.764	0.68	0.898	0.684	0.97	0.643	0.658	0.65	0.778	0.928	0.705	0.652	0.764	0.475	0.42	0.897	0.671	0.812	0.452	0.808	0.933	0.788	0.886
W84	0.836	0.736	0.73	0.762	0.569	0.717	0.452	0.695	0.67	0.916	0.74	0.944	0.71	0.626	0.451	0.693	0.943	0.565	0.546	0.753	0.533	0.724	0.881	0.989	0.888	0.543	0.596	0.682	0.637	0.704	0.848	0.651	0.622	0.585	0.505	0.852	0.598	0.643	0.624	0.604	0.748	0.716	0.604	0.368	0.785	0.658	0.736	0.526	0.608
W85	0.715	0.868	0.868	0.85	0.867	0.859	0.725	0.793	0.858	0.764	0.847	0.758	0.955	0.862	0.737	0.6	0.931	0.78	0.696	0.666	0.808	0.892	0.959	0.988	0.982	0.835	0.857	0.875	0.851	0.84	0.715	0.84	0.728	0.749	0.724	0.697	0.865	0.703	0.876	0.857	0.822	0.908	0.864	0.636	0.845	0.846	0.845	0.688	0.671
W86	0.79	0.723	0.733	0.77	0.644	0.647	0.621	0.631	0.595	0.839	0.766	0.929	0.793	0.58	0.703	0.752	0.954	0.722	0.778	0.703	0.646	0.717	0.753	0.961	0.803	0.663	0.591	0.645	0.597	0.768	0.817	0.686	0.788	0.814	0.711	0.838	0.681	0.824	0.622	0.733	0.805	0.665	0.625	0.709	0.727	0.692	0.814	0.62	0.8
W87	0.757	0.789	0.795	0.826	0.663	0.667	0.708	0.571	0.586	0.745	0.76	0.884	0.749	0.631	0.713	0.812	0.964	0.739	0.773	0.741	0.696	0.816	0.858	0.981	0.829	0.695	0.49	0.692	0.534	0.806	0.82	0.788	0.854	0.855	0.717	0.776	0.712	0.907	0.544	0.761	0.817	0.583	0.661	0.681	0.796	0.762	0.803	0.59	0.814
W88	0.861	0.6	0.576	0.517	0.638	0.64	0.526	0.708	0.721	0.873	0.506	0.962	0.832	0.659	0.637	0.559	0.888	0.736	0.619	0.819	0.617	0.576	0.839	0.966	0.834	0.584	0.668	0.606	0.777	0.57	0.891	0.526	0.562	0.607	0.444	0.873	0.562	0.438	0.674	0.57	0.525	0.787	0.541	0.488	0.571	0.69	0.877	0.518	0.635
W89	0.773	0.681	0.666	0.525	0.594	0.572	0.607	0.609	0.549	0.727	0.519	0.908	0.631	0.573	0.574	0.655	0.866	0.686	0.74	0.679	0.681	0.742	0.745	0.871	0.717	0.555	0.555	0.672	0.537	0.573	0.827	0.608	0.717	0.649	0.555	0.839	0.537	0.804	0.497	0.648	0.639	0.566	0.505	0.653	0.685	0.495	0.69	0.612	0.758
W90	0.893	0.589	0.506	0.381	0.454	0.575	0.691	0.716	0.615	0.805	0.357	0.98	0.842	0.527	0.692	0.618	0.969	0.823	0.855	0.846	0.637	0.665	0.851	0.992	0.921	0.527	0.528	0.496	0.568	0.351	0.93	0.568	0.602	0.43	0.479	0.911	0.331	0.647	0.523	0.599	0.35	0.59	0.366	0.663	0.578	0.495	0.902	0.696	0.787
W91	0.954	0.973	0.952	0.969	0.928	0.956	0.981	0.945	0.911	0.919	0.915	0.963	0.976	0.933	0.932	0.988	0.885	0.913	0.992	0.965	0.957	0.963	0.905	0.907	0.967	0.98	0.914	0.981	0.984	0.969	0.983	0.982	0.746	0.947	0.901	0.996	0.959	0.984	0.901	0.946	0.975	0.935	0.963	0.94	0.925	0.956	0.966	0.922	0.961
W92	0.585	0.78	0.886	0.869	0.665	0.807	0.385	0.61	0.68	0.744	0.83	0.736	0.7	0.68	0.477	0.821	0.936	0.677	0.523	0.51	0.603	0.742	0.844	0.997	0.883	0.675	0.661	0.783	0.592	0.76	0.626	0.717	0.748	0.792	0.517	0.611	0.671	0.719	0.667	0.705	0.858	0.659	0.669	0.438	0.901	0.678	0.753	0.469	0.609
W93	0.827	0.555	0.559	0.472	0.428	0.6	0.613	0.572	0.585	0.838	0.434	0.969	0.755	0.525	0.617	0.626	0.966	0.712	0.752	0.795	0.538	0.582	0.778	0.985	0.87	0.432	0.43	0.481	0.519	0.441	0.854	0.571	0.562	0.516	0.487	0.86	0.363	0.682	0.48	0.549	0.456	0.521	0.328	0.585	0.592	0.533	0.794	0.526	0.818
W94	0.852	0.646	0.627	0.517	0.409	0.718	0.392	0.701	0.742	0.881	0.509	0.957	0.66	0.652	0.434	0.635	0.957	0.649	0.545	0.823	0.471	0.636	0.896	0.991	0.913	0.383	0.614	0.552	0.613	0.528	0.897	0.588	0.567	0.559	0.398	0.874	0.441	0.486	0.606	0.562	0.535	0.674	0.456	0.419	0.618	0.648	0.857	0.552	0.646
W95	0.817	0.645	0.662	0.704	0.555	0.586	0.475	0.671	0.708	0.825	0.614	0.966	0.792	0.615	0.54	0.708	0.927	0.699	0.471	0.806	0.581	0.708	0.838	0.977	0.88	0.538	0.546	0.601	0.717	0.585	0.894	0.687	0.647	0.734	0.443	0.876	0.584	0.459	0.461	0.567	0.678	0.742	0.607	0.362	0.714	0.707	0.847	0.456	0.643
W96	0.726	0.397	0.684	0.623	0.646	0.584	0.661	0.635	0.718	0.875	0.648	0.787	0.764	0.554	0.609	0.684	0.946	0.698	0.809	0.793	0.585	0.448	0.807	0.907	0.818	0.61	0.65	0.516	0.747	0.641	0.818	0.578	0.599	0.654	0.64	0.846	0.603	0.694	0.628	0.601	0.637	0.625	0.559	0.712	0.625	0.651	0.666	0.613	0.785
W97	0.808	0.567	0.428	0.468	0.522	0.5	0.649	0.617	0.608	0.728	0.447	0.961	0.738	0.524	0.656	0.538	0.958	0.748	0.768	0.826	0.598	0.52	0.832	0.992	0.869	0.477	0.513	0.506	0.607	0.486	0.896	0.499	0.567	0.562	0.537	0.836	0.494	0.644	0.502	0.491	0.451	0.676	0.403	0.608	0.474	0.594	0.829	0.635	0.806
W98	0.917	0.643	0.501	0.326	0.46	0.553	0.751	0.758	0.56	0.834	0.385	0.974	0.884	0.578	0.758	0.569	0.963	0.805	0.862	0.898	0.665	0.654	0.864	0.969	0.885	0.526	0.583	0.467	0.604	0.452	0.967	0.588	0.618	0.472	0.514	0.915	0.411	0.645	0.581	0.61	0.365	0.651	0.421	0.7	0.491	0.559	0.936	0.742	0.837
W99	0.794	0.728	0.735	0.624	0.604	0.626	0.614	0.499	0.576	0.855	0.594	0.94	0.66	0.666	0.67	0.704	0.954	0.715	0.721	0.752	0.647	0.72	0.831	0.978	0.807	0.664	0.513	0.761	0.461	0.608	0.895	0.688	0.715	0.652	0.599	0.825	0.613	0.838	0.614	0.76	0.675	0.512	0.593	0.684	0.818	0.533	0.822	0.565	0.781
W100	0.768	0.597	0.769	0.783	0.715	0.616	0.681	0.66	0.747	0.973	0.79	0.968	0.805	0.606	0.749	0.803	0.972	0.741	0.835	0.811	0.634	0.524	0.765	0.989	0.856	0.739	0.653	0.739	0.827	0.73	0.807	0.68	0.589	0.788	0.693	0.868	0.674	0.797	0.637	0.652	0.787	0.8	0.664	0.724	0.808	0.717	0.791	0.682	0.794
W101	0.824	0.563	0.647	0.487	0.367	0.659	0.534	0.579	0.593	0.831	0.393	0.946	0.72	0.541	0.532	0.663	0.919	0.698	0.704	0.704	0.487	0.605	0.787	0.971	0.845	0.482	0.491	0.527	0.436	0.436	0.795	0.559	0.603	0.443	0.354	0.861	0.337	0.654	0.464	0.59	0.457	0.433	0.288	0.548	0.644	0.49	0.742	0.465	0.777
W102	0.948	0.859	0.884	0.801	0.867	0.821	0.655	0.888	0.872	0.886	0.744	0.949	0.821	0.881	0.737	0.813	0.693	0.885	0.444	0.883	0.874	0.946	0.636	0.763	0.722	0.785	0.847	0.912	0.879	0.842	0.941	0.844	0.925	0.876	0.661	0.948	0.862	0.494	0.83	0.91	0.871	0.852	0.865	0.644	0.867	0.764	0.779	0.708	0.743
W103	0.892	0.601	0.436	0.548	0.677	0.596	0.782	0.771	0.715	0.827	0.552	0.954	0.896	0.696	0.767	0.512	0.913	0.712	0.869	0.865	0.654	0.607	0.861	0.978	0.914	0.529	0.661	0.574	0.814	0.542	0.939	0.538	0.637	0.593	0.657	0.885	0.579	0.616	0.617	0.339	0.343	0.837	0.576	0.68	0.411	0.71	0.879	0.726	0.825
W104	0.858	0.624	0.561	0.539	0.521	0.557	0.679	0.653	0.535	0.846	0.562	0.919	0.823	0.566	0.628	0.597	0.924	0.714	0.793	0.739	0.58	0.67	0.849	0.92	0.873	0.507	0.466	0.587	0.557	0.561	0.891	0.584	0.581	0.576	0.595	0.855	0.536	0.684	0.519	0.638	0.587	0.569	0.486	0.664	0.588	0.621	0.858	0.565	0.803
W105	0.888	0.551	0.575	0.541	0.77	0.765	0.847	0.845	0.824	0.893	0.629	0.901	0.945	0.747	0.708	0.553	0.921	0.755	0.92	0.891	0.723	0.544	0.915	0.911	0.946	0.65	0.763	0.543	0.876	0.694	0.951	0.614	0.675	0.613	0.76	0.92	0.666	0.629	0.762	0.439	0.385	0.83	0.661	0.808	0.394	0.743	0.78	0.778	0.836
W106	0.906	0.652	0.628	0.413	0.533	0.716	0.738	0.639	0.699	0.899	0.385	0.956	0.864	0.66	0.742	0.544	0.961	0.807	0.762	0.841	0.552	0.662	0.921	0.963	0.937	0.582	0.593	0.636	0.535	0.45	0.934	0.567	0.496	0.273	0.507	0.896	0.45	0.619	0.642	0.638	0.411	0.572	0.463	0.628	0.647	0.522	0.826	0.647	0.822
W107	0.425	0.612	0.734	0.713	0.652	0.695	0.669	0.601	0.661	0.707	0.706	0.59	0.857	0.614	0.706	0.706	0.962	0.763	0.821	0.385	0.607	0.639	0.851	0.989	0.882	0.668	0.576	0.648	0.68	0.684	0.456	0.644	0.7	0.71	0.649	0.471	0.659	0.716	0.583	0.671	0.684	0.685	0.602	0.685	0.749	0.645	0.801	0.55	0.768
W108	0.971	0.862	0.843	0.716	0.914	0.769	0.812	0.898	0.869	0.759	0.766	0.922	0.873	0.922	0.769	0.815	0.531	0.867	0.827	0.907	0.936	0.979	0.591	0.533	0.522	0.786	0.857	0.887	0.913	0.813	0.952	0.883	0.944	0.909	0.788	0.967	0.868	0.826	0.803	0.904	0.852	0.876	0.901	0.746	0.755	0.791	0.724	0.783	0.839
W109	0.787	0.777	0.784	0.773	0.476	0.708	0.458	0.624	0.542	0.866	0.747	0.937	0.57	0.582	0.409	0.785	0.904	0.671	0.64	0.714	0.518	0.784	0.743	0.938	0.815	0.496	0.467	0.661	0.457	0.766	0.854	0.712	0.816	0.835	0.593	0.836	0.647	0.803	0.467	0.74	0.78	0.513	0.614	0.529	0.782	0.625	0.742	0.506	0.709
W110	0.802	0.635	0.701	0.739	0.584	0.619	0.611	0.703	0.751	0.905	0.727	0.873	0.656	0.663	0.654	0.698	0.955	0.546	0.673	0.849	0.465	0.68	0.875	0.993	0.828	0.513	0.584	0.656	0.701	0.64	0.911	0.662	0.629	0.662	0.649	0.853	0.602	0.706	0.573	0.616	0.722	0.727	0.646	0.527	0.73	0.718	0.763	0.639	0.824
W111	0.795	0.724	0.835	0.744	0.592	0.688	0.386	0.579	0.642	0.83	0.707	0.949	0.716	0.58	0.564	0.816	0.952	0.803	0.451	0.74	0.638	0.789	0.87	0.987	0.769	0.681	0.558	0.7	0.5	0.693	0.831	0.691	0.769	0.738	0.481	0.837	0.61	0.634	0.628	0.808	0.727	0.506	0.586	0.487	0.845	0.663	0.796	0.45	0.66
W112	0.694	0.872	0.933	0.903	0.849	0.873	0.816	0.76	0.805	0.729	0.901	0.639	0.873	0.816	0.774	0.922	0.948	0.857	0.879	0.596	0.847	0.879	0.887	0.914	0.902	0.87	0.831	0.863	0.809	0.884	0.702	0.861	0.89	0.88	0.845	0.731	0.859	0.929	0.837	0.873	0.911	0.66	0.839	0.849	0.881	0.835	0.843	0.716	0.896
W113	0.748	0.644	0.802	0.791	0.583	0.712	0.516	0.524	0.624	0.898	0.74	0.876	0.694	0.542	0.626	0.811	0.968	0.615	0.722	0.73	0.54	0.615	0.741	0.99	0.805	0.65	0.56	0.679	0.534	0.734	0.815	0.679	0.697	0.775	0.651	0.806	0.629	0.76	0.622	0.703	0.777	0.565	0.589	0.659	0.786	0.642	0.792	0.502	0.784
W114	0.79	0.575	0.797	0.801	0.726	0.67	0.603	0.701	0.582	0.815	0.804	0.938	0.769	0.481	0.647	0.834	0.785	0.802	0.797	0.75	0.759	0.695	0.628	0.833	0.586	0.749	0.662	0.606	0.703	0.837	0.774	0.607	0.86	0.916	0.684	0.874	0.636	0.883	0.649	0.75	0.838	0.733	0.614	0.752	0.754	0.609	0.646	0.718	0.76
W115	0.593	0.748	0.941	0.887	0.814	0.809	0.624	0.663	0.759	0.647	0.894	0.674	0.672	0.661	0.739	0.875	0.852	0.771	0.784	0.57	0.709	0.767	0.78	0.863	0.648	0.745	0.707	0.764	0.739	0.843	0.599	0.707	0.9	0.95	0.761	0.647	0.688	0.951	0.723	0.747	0.94	0.745	0.734	0.762	0.935	0.718	0.722	0.723	0.85
W116	0.98	0.87	0.799	0.799	0.846	0.725	0.927	0.902	0.775	0.737	0.765	0.886	0.866	0.851	0.847	0.836	0.398	0.888	0.932	0.939	0.91	0.976	0.587	0.448	0.443	0.745	0.797	0.799	0.88	0.822	0.985	0.875	0.943	0.898	0.865	0.974	0.852	0.927	0.754	0.91	0.797	0.839	0.85	0.846	0.709	0.785	0.78	0.878	0.961
W117	0.347	0.973	0.973	0.985	0.969	0.974	0.961	0.896	0.954	0.752	0.976	0.376	0.958	0.964	0.954	0.97	0.977	0.949	0.958	0.469	0.972	0.978	0.977	0.998	0.977	0.962	0.962	0.976	0.946	0.957	0.308	0.96	0.958	0.978	0.961	0.196	0.949	0.973	0.971	0.958	0.98	0.961	0.96	0.948	0.985	0.951	0.97	0.926	0.953
W118	0.842	0.749	0.814	0.807	0.622	0.723	0.647	0.652	0.512	0.781	0.709	0.929	0.7	0.556	0.692	0.804	0.786	0.776	0.796	0.815	0.737	0.859	0.622	0.875	0.712	0.631	0.569	0.608	0.623	0.753	0.808	0.712	0.776	0.864	0.628	0.907	0.621	0.915	0.536	0.764	0.809	0.655	0.589	0.673	0.815	0.581	0.674	0.669	0.801
W119	0.801	0.44	0.668	0.675	0.436	0.64	0.446	0.609	0.64	0.852	0.638	0.968	0.648	0.49	0.509	0.698	0.933	0.542	0.754	0.751	0.447	0.628	0.774	0.982	0.714	0.404	0.537	0.525	0.625	0.617	0.765	0.474	0.646	0.689	0.578	0.855	0.477	0.715	0.539	0.569	0.664	0.705	0.423	0.566	0.678	0.63	0.729	0.563	0.786
W120	0.841	0.887	0.861	0.817	0.887	0.805	0.898	0.823	0.837	0.686	0.789	0.807	0.854	0.885	0.892	0.789	0.483	0.864	0.925	0.813	0.906	0.966	0.592	0.513	0.457	0.78	0.834	0.86	0.884	0.847	0.825	0.869	0.944	0.946	0.862	0.823	0.849	0.941	0.794	0.876	0.856	0.882	0.868	0.821	0.831	0.779	0.784	0.868	0.907
W121	0.808	0.646	0.663	0.591	0.511	0.547	0.618	0.607	0.474	0.761	0.554	0.928	0.774	0.462	0.627	0.706	0.92	0.786	0.785	0.759	0.699	0.786	0.8	0.946	0.812	0.599	0.534	0.465	0.483	0.595	0.844	0.628	0.737	0.644	0.549	0.874	0.513	0.821	0.515	0.737	0.588	0.549	0.486	0.703	0.722	0.475	0.799	0.649	0.762
W122	0.795	0.721	0.765	0.719	0.603	0.648	0.618	0.529	0.432	0.821	0.674	0.873	0.767	0.492	0.543	0.742	0.92	0.739	0.701	0.669	0.613	0.706	0.796	0.905	0.841	0.624	0.456	0.691	0.481	0.71	0.86	0.674	0.688	0.655	0.588	0.818	0.609	0.839	0.569	0.688	0.713	0.463	0.59	0.632	0.714	0.556	0.724	0.53	0.715
W123	0.792	0.646	0.804	0.583	0.544	0.778	0.576	0.686	0.695	0.812	0.542	0.941	0.677	0.586	0.534	0.81	0.928	0.71	0.727	0.765	0.71	0.749	0.788	0.964	0.78	0.634	0.64	0.611	0.474	0.543	0.818	0.634	0.758	0.575	0.479	0.862	0.398	0.833	0.626	0.719	0.564	0.496	0.417	0.682	0.819	0.442	0.721	0.685	0.741
W124	0.795	0.605	0.711	0.713	0.535	0.64	0.376	0.589	0.56	0.77	0.615	0.966	0.722	0.438	0.482	0.784	0.954	0.769	0.647	0.711	0.659	0.735	0.783	0.99	0.799	0.653	0.553	0.627	0.539	0.619	0.786	0.58	0.667	0.66	0.43	0.834	0.489	0.68	0.528	0.692	0.658	0.588	0.424	0.526	0.76	0.559	0.796	0.485	0.605
W125	0.812	0.578	0.509	0.585	0.567	0.568	0.514	0.609	0.708	0.877	0.611	0.971	0.673	0.616	0.582	0.586	0.966	0.615	0.706	0.805	0.427	0.419	0.879	0.989	0.846	0.457	0.577	0.556	0.724	0.581	0.899	0.528	0.63	0.683	0.55	0.851	0.522	0.604	0.54	0.435	0.591	0.742	0.525	0.555	0.585	0.732	0.836	0.586	0.748
W126	0.823	0.506	0.381	0.532	0.579	0.502	0.643	0.674	0.654	0.831	0.555	0.974	0.792	0.626	0.675	0.52	0.937	0.668	0.79	0.84	0.546	0.485	0.745	0.984	0.86	0.454	0.534	0.476	0.726	0.505	0.865	0.55	0.602	0.661	0.553	0.864	0.459	0.666	0.535	0.39	0.467	0.723	0.441	0.566	0.457	0.672	0.802	0.629	0.815
W127	0.863	0.774	0.865	0.748	0.642	0.709	0.627	0.73	0.768	0.901	0.753	0.935	0.543	0.779	0.65	0.813	0.629	0.685	0.73	0.888	0.654	0.808	0.595	0.696	0.501	0.538	0.715	0.781	0.682	0.74	0.923	0.766	0.818	0.857	0.72	0.896	0.7	0.932	0.703	0.836	0.776	0.692	0.708	0.684	0.801	0.684	0.695	0.743	0.92
W128	0.865	0.595	0.408	0.45	0.592	0.516	0.737	0.704	0.543	0.807	0.518	0.945	0.856	0.544	0.714	0.535	0.924	0.725	0.854	0.813	0.62	0.544	0.789	0.943	0.833	0.502	0.498	0.43	0.744	0.553	0.912	0.525	0.608	0.628	0.606	0.877	0.485	0.643	0.549	0.494	0.447	0.745	0.469	0.644	0.392	0.663	0.853	0.691	0.8
W129	0.917	0.809	0.715	0.557	0.583	0.715	0.782	0.801	0.661	0.783	0.57	0.815	0.88	0.701	0.727	0.837	0.922	0.818	0.883	0.894	0.84	0.829	0.924	0.865	0.971	0.721	0.728	0.66	0.628	0.572	0.967	0.807	0.784	0.61	0.632	0.925	0.598	0.842	0.734	0.831	0.588	0.569	0.634	0.798	0.68	0.623	0.927	0.803	0.859
W130	0.908	0.865	0.91	0.833	0.934	0.792	0.9	0.897	0.879	0.894	0.861	0.937	0.819	0.908	0.924	0.856	0.351	0.883	0.907	0.947	0.9	0.89	0.602	0.429	0.337	0.834	0.894	0.912	0.942	0.862	0.951	0.865	0.918	0.952	0.923	0.947	0.928	0.967	0.851	0.908	0.928	0.896	0.93	0.898	0.835	0.797	0.787	0.879	0.959
W131	0.775	0.711	0.813	0.832	0.67	0.722	0.337	0.674	0.659	0.874	0.811	0.93	0.687	0.656	0.457	0.842	0.936	0.692	0.464	0.715	0.618	0.647	0.847	0.957	0.845	0.682	0.611	0.746	0.65	0.748	0.858	0.737	0.799	0.824	0.525	0.839	0.653	0.594	0.649	0.647	0.822	0.619	0.682	0.426	0.821	0.689	0.802	0.465	0.612
W132	0.887	0.791	0.782	0.863	0.663	0.714	0.715	0.673	0.563	0.836	0.82	0.936	0.735	0.576	0.696	0.846	0.686	0.786	0.824	0.761	0.722	0.82	0.518	0.738	0.62	0.664	0.6	0.709	0.673	0.826	0.867	0.745	0.88	0.907	0.666	0.878	0.681	0.925	0.584	0.733	0.876	0.639	0.653	0.751	0.833	0.605	0.667	0.704	0.815
W133	0.776	0.634	0.744	0.725	0.68	0.661	0.571	0.513	0.587	0.724	0.707	0.88	0.851	0.572	0.697	0.717	0.966	0.78	0.83	0.645	0.693	0.83	0.871	0.981	0.772	0.701	0.554	0.691	0.603	0.623	0.768	0.605	0.751	0.768	0.705	0.748	0.627	0.823	0.635	0.776	0.758	0.633	0.621	0.647	0.824	0.633	0.877	0.566	0.729
W134	0.815	0.609	0.739	0.691	0.693	0.655	0.683	0.677	0.668	0.844	0.663	0.763	0.771	0.657	0.687	0.718	0.792	0.702	0.809	0.804	0.668	0.724	0.6	0.77	0.728	0.642	0.645	0.737	0.764	0.738	0.844	0.654	0.744	0.733	0.723	0.856	0.715	0.812	0.66	0.747	0.721	0.639	0.677	0.715	0.677	0.584	0.65	0.62	0.833
W135	0.917	0.688	0.589	0.612	0.782	0.792	0.852	0.845	0.824	0.935	0.657	0.949	0.941	0.771	0.803	0.574	0.902	0.687	0.925	0.899	0.733	0.623	0.953	0.961	0.971	0.638	0.782	0.665	0.888	0.677	0.96	0.559	0.654	0.599	0.752	0.929	0.7	0.604	0.761	0.45	0.412	0.88	0.657	0.814	0.466	0.787	0.896	0.789	0.849
W136	0.872	0.665	0.65	0.584	0.511	0.567	0.63	0.614	0.483	0.753	0.561	0.859	0.805	0.472	0.604	0.711	0.923	0.763	0.79	0.747	0.658	0.735	0.863	0.896	0.806	0.606	0.526	0.54	0.545	0.593	0.868	0.593	0.702	0.598	0.515	0.867	0.495	0.762	0.563	0.704	0.603	0.517	0.443	0.654	0.634	0.567	0.871	0.621	0.777
W137	0.863	0.648	0.503	0.548	0.608	0.586	0.714	0.711	0.602	0.828	0.572	0.951	0.891	0.576	0.727	0.551	0.954	0.756	0.86	0.747	0.609	0.62	0.858	0.936	0.906	0.549	0.563	0.538	0.684	0.623	0.885	0.553	0.628	0.612	0.63	0.86	0.576	0.631	0.583	0.568	0.578	0.73	0.506	0.699	0.565	0.672	0.859	0.649	0.791
W138	0.97	0.935	0.844	0.785	0.814	0.836	0.899	0.908	0.808	0.803	0.78	0.761	0.814	0.814	0.819	0.87	0.54	0.878	0.904	0.943	0.955	0.992	0.642	0.492	0.568	0.779	0.844	0.843	0.823	0.883	0.983	0.887	0.926	0.885	0.872	0.977	0.849	0.932	0.791	0.942	0.842	0.715	0.829	0.909	0.729	0.791	0.814	0.91	0.947
W139	0.948	0.838	0.889	0.768	0.898	0.819	0.678	0.845	0.838	0.845	0.822	0.874	0.839	0.873	0.688	0.809	0.759	0.85	0.725	0.822	0.887	0.929	0.704	0.727	0.736	0.795	0.806	0.89	0.851	0.841	0.925	0.841	0.906	0.871	0.719	0.949	0.829	0.754	0.82	0.908	0.869	0.794	0.873	0.633	0.799	0.698	0.768	0.67	0.735
W140	0.337	0.825	0.86	0.845	0.691	0.812	0.675	0.563	0.67	0.693	0.805	0.468	0.755	0.698	0.677	0.808	0.964	0.744	0.743	0.297	0.672	0.817	0.875	0.986	0.883	0.703	0.618	0.759	0.616	0.785	0.399	0.765	0.82	0.849	0.705	0.332	0.68	0.874	0.626	0.72	0.833	0.605	0.708	0.688	0.878	0.716	0.838	0.593	0.801
W141	0.881	0.796	0.797	0.779	0.805	0.719	0.829	0.713	0.746	0.836	0.766	0.95	0.912	0.792	0.797	0.778	0.942	0.867	0.868	0.761	0.777	0.87	0.855	0.957	0.937	0.816	0.677	0.822	0.713	0.731	0.921	0.828	0.81	0.8	0.818	0.907	0.783	0.876	0.742	0.872	0.791	0.779	0.856	0.707	0.851	0.705	0.891	0.686	0.855
W142	0.766	0.757	0.795	0.72	0.687	0.734	0.624	0.593	0.63	0.721	0.672	0.782	0.757	0.716	0.604	0.744	0.92	0.743	0.738	0.678	0.729	0.824	0.884	0.939	0.909	0.682	0.628	0.763	0.632	0.697	0.793	0.726	0.734	0.69	0.598	0.77	0.71	0.698	0.672	0.784	0.697	0.639	0.694	0.594	0.742	0.645	0.863	0.483	0.732
W143	0.777	0.579	0.807	0.633	0.501	0.717	0.522	0.587	0.641	0.851	0.586	0.933	0.708	0.52	0.543	0.798	0.838	0.623	0.731	0.737	0.626	0.722	0.792	0.962	0.729	0.635	0.603	0.645	0.544	0.586	0.818	0.537	0.637	0.608	0.442	0.843	0.387	0.779	0.619	0.628	0.622	0.511	0.399	0.586	0.779	0.518	0.798	0.585	0.72
W144	0.86	0.547	0.517	0.569	0.545	0.405	0.647	0.694	0.571	0.706	0.568	0.963	0.816	0.507	0.683	0.652	0.958	0.771	0.819	0.737	0.673	0.697	0.813	0.973	0.849	0.539	0.554	0.473	0.661	0.462	0.84	0.603	0.642	0.63	0.535	0.882	0.483	0.73	0.526	0.651	0.562	0.708	0.44	0.601	0.657	0.584	0.836	0.67	0.797
W145	0.231	0.815	0.858	0.823	0.791	0.818	0.749	0.729	0.803	0.731	0.827	0.369	0.842	0.791	0.77	0.829	0.973	0.798	0.818	0.37	0.817	0.828	0.879	0.994	0.909	0.791	0.799	0.831	0.794	0.785	0.22	0.771	0.779	0.819	0.781	0.186	0.77	0.85	0.828	0.807	0.81	0.811	0.758	0.79	0.889	0.736	0.858	0.744	0.801
W146	0.804	0.686	0.753	0.616	0.335	0.632	0.471	0.612	0.621	0.855	0.52	0.965	0.498	0.62	0.456	0.779	0.953	0.577	0.67	0.8	0.473	0.707	0.862	0.988	0.792	0.437	0.581	0.676	0.43	0.522	0.897	0.685	0.669	0.568	0.466	0.831	0.427	0.831	0.563	0.688	0.563	0.494	0.442	0.561	0.792	0.502	0.789	0.607	0.794
W147	0.811	0.636	0.718	0.408	0.494	0.647	0.691	0.683	0.7	0.911	0.457	0.956	0.763	0.634	0.689	0.657	0.903	0.721	0.763	0.796	0.634	0.694	0.8	0.96	0.804	0.569	0.643	0.646	0.607	0.423	0.86	0.607	0.602	0.491	0.456	0.867	0.41	0.727	0.636	0.648	0.459	0.603	0.486	0.669	0.66	0.456	0.816	0.662	0.805
W148	0.768	0.506	0.652	0.663	0.518	0.614	0.313	0.574	0.66	0.883	0.66	0.966	0.648	0.544	0.489	0.66	0.959	0.623	0.593	0.713	0.392	0.536	0.817	0.972	0.774	0.478	0.534	0.531	0.633	0.614	0.789	0.521	0.644	0.681	0.437	0.84	0.503	0.549	0.547	0.56	0.662	0.672	0.484	0.418	0.704	0.652	0.773	0.408	0.654
W149	0.379	0.775	0.925	0.92	0.811	0.864	0.634	0.646	0.726	0.651	0.894	0.512	0.832	0.718	0.732	0.887	0.966	0.847	0.754	0.309	0.773	0.861	0.898	0.997	0.796	0.829	0.741	0.78	0.692	0.858	0.329	0.746	0.845	0.887	0.706	0.417	0.77	0.834	0.774	0.849	0.895	0.728	0.728	0.741	0.957	0.798	0.827	0.618	0.778
W150	0.885	0.621	0.524	0.522	0.708	0.656	0.813	0.766	0.79	0.813	0.555	0.964	0.887	0.745	0.8	0.554	0.87	0.748	0.884	0.87	0.657	0.584	0.826	0.982	0.869	0.597	0.698	0.623	0.871	0.57	0.936	0.579	0.619	0.665	0.685	0.894	0.607	0.651	0.689	0.417	0.383	0.863	0.61	0.643	0.408	0.733	0.891	0.721	0.832
W151	0.513	0.831	0.891	0.867	0.796	0.824	0.698	0.668	0.737	0.694	0.852	0.616	0.867	0.718	0.712	0.837	0.96	0.853	0.811	0.388	0.781	0.87	0.878	0.995	0.911	0.829	0.694	0.845	0.726	0.791	0.526	0.785	0.839	0.862	0.753	0.506	0.757	0.854	0.751	0.801	0.858	0.73	0.804	0.707	0.897	0.722	0.887	0.672	0.725
W152	0.9	0.621	0.563	0.476	0.694	0.748	0.735	0.771	0.782	0.894	0.506	0.913	0.817	0.702	0.717	0.472	0.625	0.694	0.838	0.83	0.666	0.596	0.663	0.758	0.706	0.546	0.745	0.639	0.833	0.657	0.894	0.479	0.603	0.558	0.652	0.91	0.605	0.592	0.693	0.52	0.444	0.791	0.547	0.748	0.434	0.598	0.735	0.698	0.83
W153	0.839	0.616	0.805	0.821	0.737	0.713	0.591	0.627	0.634	0.786	0.704	0.961	0.758	0.562	0.684	0.804	0.955	0.838	0.791	0.786	0.674	0.829	0.665	0.985	0.766	0.74	0.625	0.729	0.651	0.737	0.871	0.64	0.805	0.769	0.652	0.856	0.625	0.862	0.697	0.824	0.769	0.699	0.573	0.694	0.829	0.725	0.857	0.669	0.766
W154	0.716	0.629	0.457	0.547	0.552	0.507	0.72	0.569	0.532	0.679	0.545	0.832	0.857	0.542	0.753	0.564	0.971	0.764	0.831	0.668	0.576	0.584	0.878	0.973	0.885	0.481	0.442	0.434	0.649	0.535	0.79	0.569	0.625	0.63	0.62	0.746	0.536	0.659	0.46	0.543	0.529	0.72	0.482	0.601	0.538	0.663	0.867	0.577	0.839
W155	0.782	0.517	0.65	0.754	0.55	0.499	0.434	0.453	0.442	0.758	0.694	0.958	0.71	0.404	0.601	0.764	0.954	0.684	0.728	0.693	0.516	0.538	0.806	0.991	0.72	0.587	0.417	0.554	0.577	0.68	0.791	0.552	0.725	0.769	0.502	0.835	0.503	0.752	0.501	0.585	0.72	0.61	0.438	0.576	0.717	0.571	0.783	0.489	0.713
W156	0.84	0.705	0.707	0.549	0.424	0.605	0.665	0.573	0.505	0.864	0.417	0.962	0.793	0.535	0.64	0.687	0.951	0.741	0.789	0.79	0.639	0.733	0.823	0.976	0.894	0.622	0.492	0.671	0.424	0.512	0.894	0.661	0.693	0.512	0.426	0.849	0.471	0.79	0.519	0.672	0.525	0.469	0.481	0.636	0.712	0.413	0.846	0.546	0.741
W157	0.779	0.425	0.477	0.578	0.527	0.475	0.545	0.583	0.548	0.712	0.567	0.964	0.759	0.368	0.666	0.637	0.949	0.653	0.774	0.816	0.517	0.563	0.81	0.977	0.735	0.449	0.429	0.345	0.658	0.53	0.843	0.477	0.584	0.659	0.546	0.859	0.365	0.651	0.419	0.474	0.579	0.709	0.367	0.595	0.518	0.703	0.825	0.617	0.768
W158	0.956	0.741	0.736	0.88	0.959	0.779	0.871	0.878	0.879	0.832	0.925	0.986	0.944	0.845	0.918	0.947	0.956	0.947	0.976	0.929	0.935	0.924	0.883	0.974	0.82	0.922	0.848	0.866	0.92	0.893	0.895	0.823	0.942	0.96	0.895	0.986	0.814	0.949	0.893	0.918	0.928	0.915	0.824	0.936	0.926	0.895	0.913	0.953	0.89
W159	0.418	0.731	0.908	0.87	0.763	0.8	0.652	0.622	0.754	0.642	0.846	0.554	0.685	0.686	0.764	0.843	0.876	0.792	0.784	0.419	0.721	0.797	0.738	0.896	0.69	0.736	0.701	0.791	0.703	0.849	0.425	0.73	0.839	0.914	0.777	0.51	0.762	0.934	0.643	0.766	0.916	0.695	0.695	0.778	0.908	0.713	0.669	0.627	0.906
W160	0.853	0.55	0.584	0.54	0.681	0.638	0.75	0.722	0.745	0.793	0.528	0.968	0.88	0.696	0.769	0.607	0.87	0.783	0.869	0.842	0.625	0.531	0.736	0.985	0.902	0.578	0.644	0.593	0.852	0.585	0.834	0.558	0.632	0.652	0.623	0.889	0.621	0.661	0.643	0.523	0.581	0.804	0.558	0.674	0.587	0.697	0.819	0.707	0.816
W161	0.645	0.872	0.924	0.908	0.7	0.856	0.637	0.634	0.72	0.716	0.889	0.743	0.74	0.746	0.677	0.868	0.973	0.76	0.799	0.564	0.674	0.794	0.874	0.986	0.886	0.728	0.694	0.817	0.636	0.805	0.657	0.81	0.876	0.901	0.772	0.659	0.728	0.934	0.669	0.753	0.908	0.684	0.772	0.687	0.928	0.77	0.851	0.646	0.798
W162	0.822	0.771	0.829	0.805	0.704	0.763	0.535	0.649	0.635	0.795	0.714	0.836	0.812	0.696	0.563	0.756	0.882	0.724	0.642	0.737	0.736	0.856	0.789	0.876	0.831	0.75	0.676	0.78	0.66	0.807	0.833	0.738	0.754	0.791	0.571	0.865	0.748	0.649	0.595	0.761	0.81	0.57	0.688	0.538	0.734	0.707	0.786	0.481	0.569
W163	0.889	0.859	0.78	0.878	0.751	0.748	0.862	0.749	0.635	0.831	0.83	0.937	0.877	0.736	0.868	0.911	0.897	0.878	0.925	0.892	0.845	0.915	0.889	0.958	0.926	0.758	0.695	0.722	0.754	0.827	0.936	0.884	0.813	0.918	0.846	0.935	0.85	0.931	0.667	0.843	0.839	0.79	0.82	0.821	0.79	0.846	0.876	0.812	0.92
W164	0.943	0.944	0.943	0.897	0.947	0.948	0.979	0.912	0.93	0.825	0.912	0.971	0.975	0.926	0.931	0.973	0.948	0.952	0.983	0.953	0.979	0.957	0.938	0.907	0.985	0.951	0.946	0.962	0.969	0.947	0.968	0.972	0.914	0.95	0.954	0.994	0.943	0.97	0.942	0.941	0.936	0.942	0.966	0.97	0.873	0.953	0.945	0.955	0.959
W165	0.91	0.65	0.592	0.448	0.466	0.631	0.749	0.73	0.662	0.834	0.306	0.974	0.836	0.608	0.741	0.607	0.959	0.816	0.849	0.864	0.597	0.725	0.794	0.957	0.949	0.521	0.585	0.6	0.554	0.399	0.971	0.648	0.634	0.407	0.497	0.91	0.444	0.69	0.58	0.685	0.404	0.634	0.441	0.717	0.593	0.542	0.911	0.687	0.86
W166	0.82	0.696	0.753	0.638	0.416	0.72	0.513	0.673	0.574	0.836	0.555	0.926	0.61	0.608	0.456	0.788	0.947	0.611	0.728	0.748	0.57	0.659	0.758	0.947	0.891	0.517	0.567	0.691	0.469	0.558	0.824	0.701	0.695	0.571	0.438	0.862	0.428	0.825	0.556	0.57	0.608	0.476	0.391	0.573	0.77	0.455	0.727	0.597	0.745
W167	0.854	0.582	0.377	0.457	0.631	0.487	0.727	0.697	0.603	0.768	0.532	0.957	0.884	0.52	0.777	0.43	0.949	0.77	0.875	0.814	0.622	0.59	0.849	0.935	0.863	0.56	0.529	0.485	0.751	0.613	0.912	0.52	0.645	0.584	0.617	0.895	0.548	0.627	0.585	0.482	0.425	0.767	0.484	0.701	0.393	0.722	0.9	0.682	0.824
W168	0.806	0.678	0.788	0.765	0.597	0.722	0.54	0.615	0.529	0.807	0.794	0.939	0.739	0.533	0.57	0.814	0.931	0.669	0.765	0.684	0.601	0.735	0.814	0.962	0.779	0.626	0.518	0.636	0.517	0.771	0.819	0.679	0.813	0.809	0.605	0.853	0.534	0.856	0.594	0.66	0.773	0.574	0.581	0.626	0.803	0.587	0.796	0.616	0.729
W169	0.83	0.714	0.723	0.53	0.28	0.674	0.53	0.57	0.582	0.899	0.452	0.948	0.672	0.56	0.52	0.694	0.954	0.614	0.711	0.766	0.504	0.714	0.886	0.973	0.892	0.476	0.483	0.638	0.382	0.472	0.886	0.649	0.676	0.512	0.435	0.838	0.397	0.755	0.475	0.611	0.511	0.405	0.448	0.533	0.733	0.465	0.821	0.53	0.778
W170	0.928	0.678	0.568	0.508	0.687	0.776	0.838	0.853	0.85	0.968	0.582	0.995	0.912	0.777	0.814	0.443	0.929	0.766	0.876	0.937	0.747	0.638	0.951	0.993	0.969	0.615	0.793	0.698	0.823	0.589	0.949	0.65	0.598	0.601	0.667	0.92	0.594	0.651	0.761	0.442	0.349	0.839	0.588	0.788	0.473	0.711	0.951	0.841	0.824
W171	0.821	0.587	0.718	0.634	0.493	0.668	0.572	0.578	0.611	0.865	0.587	0.96	0.775	0.48	0.675	0.66	0.963	0.714	0.733	0.754	0.531	0.701	0.739	0.984	0.786	0.567	0.537	0.593	0.58	0.569	0.824	0.56	0.646	0.61	0.512	0.839	0.467	0.73	0.603	0.656	0.636	0.6	0.447	0.613	0.765	0.57	0.81	0.631	0.76
W172	0.894	0.769	0.793	0.822	0.638	0.69	0.664	0.725	0.592	0.772	0.764	0.97	0.742	0.617	0.672	0.909	0.858	0.738	0.848	0.834	0.692	0.842	0.813	0.971	0.771	0.67	0.647	0.609	0.701	0.793	0.881	0.739	0.875	0.902	0.691	0.928	0.641	0.898	0.586	0.727	0.834	0.737	0.669	0.631	0.791	0.81	0.835	0.744	0.851
W173	0.874	0.663	0.693	0.393	0.566	0.677	0.743	0.761	0.757	0.864	0.433	0.753	0.828	0.646	0.667	0.654	0.936	0.696	0.843	0.798	0.672	0.701	0.877	0.905	0.933	0.611	0.675	0.665	0.635	0.435	0.93	0.619	0.661	0.403	0.505	0.9	0.444	0.627	0.709	0.68	0.419	0.492	0.514	0.719	0.611	0.445	0.893	0.698	0.772
W174	0.781	0.731	0.84	0.734	0.537	0.753	0.458	0.624	0.651	0.878	0.646	0.92	0.653	0.54	0.506	0.841	0.854	0.7	0.621	0.697	0.629	0.736	0.789	0.949	0.789	0.642	0.625	0.72	0.497	0.682	0.817	0.652	0.761	0.757	0.463	0.835	0.513	0.806	0.633	0.713	0.744	0.502	0.559	0.582	0.808	0.557	0.786	0.546	0.717
W175	0.917	0.772	0.853	0.743	0.907	0.744	0.889	0.855	0.899	0.779	0.792	0.945	0.837	0.917	0.906	0.845	0.552	0.886	0.921	0.949	0.906	0.886	0.501	0.595	0.516	0.824	0.872	0.914	0.947	0.82	0.876	0.872	0.903	0.935	0.9	0.956	0.899	0.963	0.811	0.896	0.905	0.9	0.891	0.855	0.819	0.778	0.706	0.884	0.972
W176	0.628	0.829	0.914	0.887	0.743	0.833	0.652	0.581	0.631	0.719	0.843	0.747	0.724	0.699	0.673	0.871	0.956	0.759	0.748	0.551	0.682	0.788	0.859	0.984	0.864	0.75	0.608	0.814	0.601	0.799	0.669	0.765	0.844	0.856	0.714	0.648	0.715	0.911	0.645	0.731	0.903	0.577	0.708	0.726	0.937	0.695	0.777	0.583	0.819
W177	0.816	0.768	0.764	0.811	0.42	0.715	0.517	0.634	0.541	0.897	0.764	0.968	0.622	0.56	0.462	0.805	0.972	0.676	0.75	0.743	0.433	0.757	0.77	0.998	0.894	0.474	0.491	0.66	0.524	0.753	0.887	0.73	0.772	0.796	0.612	0.841	0.598	0.849	0.561	0.692	0.748	0.627	0.603	0.607	0.787	0.627	0.839	0.626	0.708
W178	0.833	0.634	0.482	0.448	0.654	0.561	0.777	0.721	0.725	0.862	0.555	0.942	0.802	0.614	0.784	0.411	0.851	0.752	0.826	0.817	0.634	0.584	0.754	0.872	0.751	0.533	0.636	0.591	0.823	0.581	0.899	0.5	0.554	0.645	0.671	0.877	0.596	0.663	0.555	0.472	0.546	0.778	0.584	0.695	0.546	0.593	0.762	0.717	0.829
W179	0.898	0.849	0.87	0.811	0.796	0.861	0.532	0.78	0.749	0.916	0.804	0.924	0.705	0.749	0.6	0.842	0.831	0.733	0.376	0.784	0.782	0.843	0.761	0.901	0.793	0.696	0.769	0.834	0.757	0.8	0.885	0.67	0.816	0.813	0.544	0.91	0.692	0.431	0.773	0.77	0.814	0.72	0.73	0.615	0.902	0.615	0.744	0.654	0.636
W180	0.327	0.807	0.868	0.856	0.797	0.835	0.69	0.681	0.765	0.69	0.833	0.414	0.882	0.773	0.709	0.804	0.96	0.825	0.785	0.322	0.762	0.849	0.924	0.992	0.913	0.829	0.764	0.808	0.728	0.841	0.3	0.771	0.8	0.806	0.722	0.336	0.804	0.774	0.772	0.822	0.849	0.791	0.776	0.723	0.891	0.759	0.857	0.633	0.728
W181	0.822	0.603	0.669	0.582	0.407	0.724	0.489	0.553	0.644	0.86	0.505	0.958	0.639	0.491	0.513	0.615	0.946	0.606	0.716	0.712	0.422	0.597	0.861	0.992	0.843	0.435	0.554	0.511	0.501	0.545	0.817	0.495	0.575	0.546	0.469	0.81	0.369	0.652	0.467	0.501	0.57	0.522	0.348	0.562	0.67	0.541	0.798	0.523	0.741
W182	0.918	0.751	0.829	0.683	0.615	0.764	0.741	0.788	0.612	0.751	0.651	0.796	0.841	0.627	0.745	0.903	0.938	0.897	0.886	0.848	0.867	0.944	0.848	0.905	0.819	0.787	0.721	0.644	0.555	0.692	0.876	0.748	0.873	0.682	0.639	0.947	0.569	0.915	0.749	0.897	0.639	0.475	0.57	0.855	0.788	0.622	0.879	0.8	0.851
W183	0.773	0.626	0.743	0.716	0.612	0.661	0.613	0.547	0.516	0.786	0.586	0.932	0.747	0.507	0.559	0.711	0.939	0.728	0.759	0.705	0.574	0.601	0.791	0.973	0.875	0.633	0.489	0.616	0.504	0.648	0.836	0.636	0.652	0.619	0.546	0.852	0.583	0.786	0.545	0.675	0.647	0.593	0.552	0.58	0.755	0.488	0.678	0.523	0.687
W184	0.837	0.481	0.622	0.502	0.579	0.677	0.707	0.747	0.753	0.912	0.492	0.966	0.814	0.595	0.622	0.621	0.949	0.786	0.835	0.813	0.654	0.561	0.813	0.984	0.932	0.56	0.649	0.533	0.666	0.468	0.876	0.585	0.611	0.492	0.525	0.893	0.476	0.678	0.683	0.632	0.447	0.675	0.445	0.709	0.693	0.478	0.627	0.715	0.786
S1	0.841	0.808	0.781	0.798	0.735	0.659	0.779	0.658	0.561	0.725	0.756	0.89	0.749	0.719	0.829	0.818	0.84	0.755	0.826	0.833	0.77	0.879	0.726	0.845	0.687	0.687	0.518	0.741	0.655	0.771	0.87	0.768	0.863	0.922	0.806	0.848	0.799	0.943	0.62	0.851	0.857	0.7	0.746	0.782	0.791	0.687	0.703	0.706	0.91
S2	0.783	0.572	0.586	0.694	0.468	0.519	0.541	0.556	0.458	0.773	0.648	0.884	0.692	0.397	0.567	0.696	0.928	0.631	0.728	0.716	0.449	0.623	0.862	0.918	0.777	0.479	0.396	0.407	0.512	0.62	0.857	0.565	0.691	0.688	0.566	0.84	0.493	0.729	0.374	0.585	0.645	0.548	0.495	0.555	0.619	0.631	0.791	0.499	0.778
S3	0.897	0.552	0.474	0.474	0.548	0.59	0.654	0.69	0.601	0.779	0.467	0.961	0.848	0.529	0.694	0.56	0.92	0.779	0.839	0.77	0.583	0.642	0.801	0.979	0.834	0.523	0.554	0.507	0.677	0.584	0.893	0.504	0.569	0.569	0.583	0.896	0.461	0.625	0.563	0.592	0.501	0.711	0.398	0.642	0.503	0.651	0.892	0.658	0.817
S4	0.237	0.843	0.862	0.883	0.778	0.831	0.757	0.704	0.76	0.722	0.842	0.376	0.888	0.801	0.781	0.841	0.975	0.805	0.813	0.373	0.777	0.845	0.937	0.995	0.922	0.79	0.757	0.821	0.796	0.81	0.244	0.84	0.838	0.866	0.757	0.19	0.817	0.838	0.753	0.793	0.876	0.811	0.803	0.753	0.894	0.817	0.893	0.7	0.793
S5	0.873	0.699	0.61	0.664	0.728	0.429	0.742	0.716	0.653	0.843	0.7	0.944	0.803	0.675	0.81	0.652	0.762	0.765	0.849	0.874	0.71	0.693	0.711	0.759	0.654	0.613	0.634	0.689	0.771	0.69	0.97	0.71	0.797	0.793	0.743	0.889	0.753	0.826	0.606	0.775	0.748	0.847	0.734	0.726	0.665	0.611	0.797	0.731	0.87
S6	0.842	0.706	0.933	0.911	0.83	0.894	0.797	0.816	0.767	0.938	0.857	0.947	0.899	0.764	0.665	0.865	0.836	0.79	0.867	0.755	0.838	0.737	0.816	0.974	0.925	0.873	0.887	0.768	0.823	0.915	0.79	0.81	0.827	0.866	0.727	0.91	0.831	0.848	0.834	0.758	0.867	0.793	0.805	0.802	0.927	0.738	0.622	0.768	0.7
S7	0.749	0.597	0.54	0.597	0.604	0.705	0.654	0.654	0.635	0.961	0.626	0.951	0.752	0.541	0.645	0.549	0.943	0.685	0.765	0.772	0.499	0.416	0.748	0.981	0.87	0.557	0.548	0.532	0.711	0.641	0.853	0.51	0.55	0.656	0.537	0.851	0.515	0.664	0.544	0.26	0.422	0.71	0.475	0.632	0.502	0.593	0.774	0.613	0.73
S8	0.293	0.907	0.959	0.94	0.932	0.929	0.82	0.814	0.9	0.729	0.945	0.355	0.938	0.883	0.816	0.91	0.964	0.941	0.83	0.401	0.871	0.91	0.966	0.991	0.949	0.938	0.928	0.903	0.867	0.955	0.234	0.87	0.867	0.898	0.832	0.248	0.911	0.861	0.926	0.914	0.937	0.889	0.884	0.831	0.962	0.899	0.883	0.797	0.837
S9	0.782	0.548	0.557	0.546	0.371	0.511	0.535	0.584	0.501	0.872	0.521	0.961	0.635	0.423	0.559	0.633	0.959	0.615	0.688	0.798	0.45	0.595	0.83	0.992	0.817	0.375	0.408	0.406	0.489	0.499	0.885	0.55	0.583	0.571	0.48	0.832	0.378	0.692	0.447	0.546	0.529	0.582	0.373	0.514	0.603	0.571	0.836	0.565	0.799
S10	0.793	0.619	0.925	0.809	0.797	0.756	0.686	0.712	0.804	0.884	0.796	0.872	0.597	0.735	0.605	0.846	0.746	0.723	0.772	0.8	0.739	0.601	0.61	0.789	0.648	0.735	0.81	0.73	0.719	0.84	0.757	0.75	0.818	0.841	0.741	0.891	0.781	0.899	0.785	0.844	0.85	0.668	0.705	0.812	0.857	0.63	0.431	0.709	0.844
S11	0.874	0.858	0.815	0.843	0.699	0.728	0.782	0.712	0.524	0.879	0.806	0.934	0.769	0.641	0.789	0.841	0.799	0.844	0.867	0.842	0.774	0.832	0.627	0.823	0.712	0.727	0.54	0.658	0.633	0.841	0.911	0.777	0.852	0.912	0.748	0.898	0.784	0.955	0.543	0.822	0.883	0.69	0.751	0.796	0.821	0.669	0.73	0.705	0.842
S12	0.783	0.793	0.912	0.889	0.646	0.823	0.427	0.659	0.761	0.936	0.875	0.96	0.71	0.645	0.609	0.873	0.96	0.756	0.366	0.78	0.656	0.804	0.882	0.995	0.826	0.75	0.7	0.791	0.642	0.845	0.835	0.755	0.702	0.839	0.591	0.846	0.705	0.559	0.676	0.76	0.885	0.645	0.721	0.548	0.936	0.784	0.826	0.562	0.641
S13	0.384	0.838	0.935	0.899	0.774	0.851	0.688	0.622	0.716	0.652	0.886	0.413	0.811	0.737	0.692	0.913	0.933	0.79	0.811	0.312	0.739	0.821	0.902	0.908	0.87	0.821	0.704	0.82	0.679	0.843	0.403	0.811	0.864	0.867	0.79	0.409	0.777	0.908	0.731	0.823	0.92	0.579	0.778	0.771	0.872	0.81	0.817	0.616	0.829
S14	0.802	0.599	0.633	0.727	0.447	0.597	0.604	0.603	0.465	0.867	0.593	0.964	0.72	0.43	0.49	0.745	0.946	0.693	0.736	0.752	0.507	0.634	0.787	0.993	0.886	0.521	0.463	0.43	0.52	0.625	0.892	0.645	0.678	0.7	0.533	0.857	0.5	0.777	0.448	0.623	0.617	0.608	0.505	0.575	0.712	0.573	0.751	0.55	0.756
S15	0.859	0.694	0.636	0.689	0.542	0.609	0.484	0.667	0.552	0.8	0.583	0.965	0.799	0.495	0.562	0.698	0.952	0.788	0.603	0.763	0.64	0.744	0.873	0.989	0.922	0.59	0.506	0.604	0.599	0.641	0.896	0.639	0.692	0.626	0.429	0.875	0.59	0.504	0.468	0.699	0.647	0.673	0.526	0.525	0.682	0.628	0.866	0.498	0.581
S16	0.864	0.793	0.763	0.613	0.595	0.598	0.724	0.755	0.68	0.865	0.63	0.94	0.641	0.676	0.754	0.8	0.736	0.753	0.759	0.861	0.76	0.785	0.632	0.75	0.571	0.62	0.674	0.69	0.568	0.621	0.914	0.775	0.845	0.742	0.618	0.896	0.574	0.942	0.671	0.828	0.689	0.615	0.623	0.756	0.808	0.516	0.709	0.768	0.905
S17	0.83	0.728	0.708	0.69	0.558	0.689	0.61	0.581	0.48	0.814	0.639	0.845	0.72	0.565	0.547	0.699	0.907	0.651	0.658	0.731	0.607	0.751	0.791	0.874	0.832	0.571	0.443	0.697	0.447	0.596	0.89	0.621	0.593	0.604	0.566	0.846	0.511	0.809	0.526	0.69	0.663	0.495	0.541	0.536	0.677	0.527	0.712	0.559	0.719
S18	0.828	0.509	0.512	0.55	0.565	0.496	0.659	0.561	0.549	0.811	0.481	0.968	0.848	0.458	0.747	0.59	0.959	0.778	0.828	0.795	0.55	0.577	0.824	0.993	0.856	0.532	0.434	0.472	0.631	0.605	0.857	0.541	0.633	0.613	0.646	0.853	0.571	0.656	0.509	0.601	0.58	0.709	0.485	0.658	0.546	0.65	0.832	0.541	0.828
S19	0.548	0.825	0.938	0.917	0.865	0.846	0.78	0.704	0.82	0.652	0.909	0.692	0.844	0.824	0.826	0.905	0.949	0.879	0.856	0.483	0.838	0.837	0.869	0.985	0.857	0.901	0.815	0.876	0.766	0.9	0.573	0.825	0.902	0.917	0.825	0.618	0.839	0.917	0.846	0.899	0.927	0.815	0.838	0.841	0.929	0.85	0.885	0.724	0.881
S20	0.534	0.728	0.895	0.888	0.814	0.755	0.579	0.591	0.711	0.742	0.864	0.721	0.813	0.675	0.593	0.893	0.966	0.856	0.695	0.507	0.711	0.651	0.889	0.995	0.861	0.845	0.686	0.811	0.725	0.82	0.626	0.785	0.846	0.864	0.661	0.6	0.798	0.804	0.782	0.798	0.877	0.72	0.808	0.673	0.939	0.667	0.815	0.561	0.669
S21	0.582	0.892	0.922	0.912	0.854	0.883	0.804	0.712	0.731	0.713	0.882	0.605	0.873	0.836	0.819	0.894	0.952	0.887	0.86	0.499	0.792	0.908	0.863	0.981	0.921	0.845	0.73	0.906	0.698	0.828	0.585	0.861	0.894	0.902	0.84	0.574	0.868	0.89	0.78	0.912	0.92	0.742	0.873	0.82	0.92	0.836	0.895	0.694	0.823
S22	0.508	0.759	0.828	0.817	0.662	0.762	0.591	0.55	0.631	0.709	0.785	0.662	0.814	0.684	0.636	0.83	0.951	0.757	0.757	0.445	0.662	0.753	0.853	0.988	0.893	0.721	0.599	0.745	0.648	0.778	0.555	0.746	0.799	0.826	0.668	0.558	0.712	0.813	0.587	0.723	0.832	0.641	0.688	0.654	0.829	0.714	0.834	0.497	0.775
S23	0.346	0.959	0.975	0.972	0.97	0.973	0.95	0.901	0.968	0.76	0.972	0.387	0.984	0.937	0.937	0.908	0.967	0.92	0.939	0.453	0.965	0.966	0.984	0.998	0.989	0.966	0.968	0.964	0.952	0.973	0.273	0.959	0.949	0.964	0.942	0.186	0.965	0.937	0.968	0.948	0.96	0.966	0.968	0.929	0.978	0.955	0.962	0.917	0.897
S24	0.764	0.6	0.774	0.801	0.457	0.685	0.419	0.587	0.602	0.866	0.707	0.969	0.609	0.495	0.465	0.807	0.892	0.621	0.747	0.742	0.439	0.616	0.778	0.995	0.789	0.534	0.578	0.629	0.613	0.712	0.801	0.603	0.712	0.784	0.535	0.84	0.527	0.804	0.547	0.541	0.77	0.641	0.521	0.512	0.798	0.64	0.791	0.538	0.751
S25	0.866	0.482	0.534	0.543	0.687	0.537	0.762	0.792	0.684	0.857	0.603	0.952	0.885	0.61	0.659	0.546	0.934	0.784	0.876	0.813	0.605	0.556	0.74	0.958	0.887	0.541	0.601	0.508	0.76	0.618	0.92	0.596	0.692	0.648	0.669	0.918	0.575	0.695	0.559	0.616	0.573	0.821	0.544	0.712	0.576	0.605	0.768	0.72	0.81
S26	0.749	0.646	0.832	0.728	0.62	0.649	0.512	0.556	0.67	0.809	0.71	0.775	0.682	0.551	0.547	0.775	0.938	0.688	0.651	0.712	0.569	0.651	0.861	0.902	0.769	0.658	0.622	0.644	0.514	0.706	0.788	0.639	0.708	0.666	0.617	0.812	0.573	0.827	0.681	0.716	0.706	0.451	0.555	0.611	0.774	0.614	0.724	0.549	0.768
S27	0.776	0.627	0.732	0.724	0.635	0.614	0.579	0.579	0.531	0.661	0.677	0.936	0.668	0.532	0.67	0.793	0.924	0.714	0.736	0.758	0.635	0.73	0.805	0.92	0.624	0.639	0.472	0.568	0.538	0.787	0.829	0.643	0.838	0.819	0.697	0.852	0.651	0.886	0.502	0.773	0.802	0.584	0.545	0.726	0.729	0.681	0.714	0.616	0.843
S28	0.802	0.584	0.548	0.586	0.397	0.559	0.568	0.614	0.463	0.862	0.543	0.932	0.689	0.441	0.529	0.602	0.926	0.605	0.756	0.781	0.42	0.53	0.804	0.944	0.828	0.367	0.417	0.38	0.541	0.607	0.882	0.516	0.613	0.64	0.53	0.864	0.442	0.671	0.353	0.484	0.566	0.589	0.413	0.565	0.538	0.574	0.762	0.585	0.768
S29	0.811	0.57	0.51	0.469	0.486	0.599	0.538	0.616	0.595	0.804	0.502	0.949	0.685	0.576	0.542	0.548	0.915	0.583	0.77	0.763	0.423	0.498	0.776	0.96	0.81	0.426	0.503	0.492	0.648	0.553	0.886	0.484	0.595	0.634	0.552	0.848	0.428	0.652	0.511	0.421	0.494	0.65	0.462	0.51	0.446	0.639	0.82	0.558	0.799
S30	0.993	0.911	0.949	0.925	0.951	0.963	0.982	0.96	0.934	0.934	0.938	0.937	0.979	0.995	0.903	0.988	0.896	0.893	0.987	0.966	0.962	0.968	0.903	0.887	0.953	0.941	0.967	0.98	0.984	0.959	0.984	0.966	0.948	0.924	0.941	0.995	0.95	0.951	0.981	0.961	0.945	0.93	0.979	0.94	0.809	0.944	0.964	0.927	0.964
S31	0.867	0.668	0.734	0.543	0.616	0.742	0.575	0.796	0.809	0.889	0.533	0.787	0.859	0.69	0.547	0.678	0.902	0.771	0.56	0.825	0.711	0.698	0.907	0.892	0.92	0.631	0.732	0.662	0.695	0.566	0.922	0.684	0.669	0.557	0.46	0.896	0.582	0.458	0.717	0.743	0.527	0.602	0.584	0.549	0.656	0.567	0.853	0.579	0.638
S32	0.836	0.666	0.54	0.505	0.644	0.696	0.707	0.709	0.667	0.924	0.575	0.914	0.726	0.642	0.705	0.458	0.895	0.627	0.797	0.801	0.574	0.502	0.8	0.895	0.802	0.471	0.628	0.559	0.768	0.62	0.908	0.495	0.604	0.667	0.607	0.88	0.523	0.66	0.563	0.275	0.428	0.747	0.52	0.679	0.411	0.619	0.765	0.664	0.805
S33	0.62	0.498	0.633	0.472	0.63	0.55	0.606	0.551	0.715	0.716	0.532	0.752	0.695	0.595	0.701	0.568	0.917	0.695	0.733	0.58	0.537	0.533	0.772	0.938	0.742	0.508	0.611	0.597	0.723	0.561	0.646	0.51	0.604	0.6	0.582	0.653	0.502	0.675	0.626	0.632	0.613	0.698	0.487	0.698	0.638	0.586	0.768	0.61	0.81
S34	0.842	0.619	0.68	0.628	0.506	0.551	0.556	0.687	0.622	0.862	0.58	0.97	0.788	0.55	0.581	0.759	0.942	0.79	0.698	0.81	0.688	0.686	0.816	0.974	0.907	0.658	0.617	0.657	0.606	0.603	0.848	0.71	0.73	0.622	0.442	0.875	0.588	0.668	0.648	0.775	0.599	0.635	0.505	0.597	0.712	0.607	0.818	0.556	0.718
S35	0.984	0.95	0.92	0.956	0.991	0.96	0.985	0.972	0.963	0.921	0.97	0.722	0.934	0.993	0.926	0.986	0.865	0.856	0.996	0.957	0.988	0.964	0.957	0.888	0.975	0.934	0.971	0.979	0.983	0.923	0.991	0.982	0.933	0.951	0.993	0.999	0.959	0.906	0.984	0.986	0.922	0.812	0.976	0.966	0.813	0.962	0.959	0.937	0.979
S36	0.824	0.797	0.876	0.858	0.745	0.832	0.475	0.699	0.657	0.885	0.849	0.924	0.817	0.695	0.519	0.881	0.919	0.749	0.396	0.711	0.715	0.744	0.833	0.954	0.883	0.766	0.694	0.736	0.716	0.831	0.824	0.753	0.827	0.831	0.513	0.87	0.675	0.451	0.76	0.711	0.86	0.68	0.678	0.575	0.855	0.722	0.808	0.543	0.52
S37	0.697	0.686	0.89	0.889	0.722	0.747	0.509	0.46	0.684	0.733	0.849	0.873	0.734	0.587	0.657	0.872	0.951	0.791	0.7	0.596	0.65	0.775	0.856	0.996	0.742	0.762	0.62	0.74	0.605	0.829	0.709	0.68	0.847	0.867	0.666	0.722	0.688	0.843	0.689	0.787	0.884	0.62	0.648	0.674	0.91	0.749	0.821	0.462	0.799
S38	0.257	0.9	0.951	0.925	0.896	0.887	0.859	0.796	0.86	0.697	0.907	0.233	0.87	0.88	0.807	0.933	0.918	0.83	0.882	0.406	0.861	0.873	0.898	0.907	0.921	0.91	0.889	0.93	0.879	0.928	0.256	0.862	0.917	0.913	0.865	0.259	0.895	0.924	0.895	0.88	0.95	0.726	0.883	0.861	0.871	0.861	0.888	0.778	0.874
S39	0.808	0.595	0.716	0.674	0.464	0.644	0.477	0.51	0.548	0.886	0.63	0.933	0.575	0.532	0.566	0.679	0.906	0.583	0.728	0.766	0.349	0.662	0.65	0.921	0.723	0.445	0.454	0.602	0.567	0.669	0.876	0.558	0.714	0.749	0.6	0.842	0.538	0.771	0.445	0.632	0.718	0.582	0.568	0.588	0.706	0.6	0.759	0.472	0.813
S40	0.878	0.664	0.597	0.456	0.408	0.583	0.698	0.66	0.549	0.826	0.362	0.931	0.732	0.554	0.666	0.66	0.915	0.75	0.784	0.82	0.589	0.747	0.757	0.939	0.875	0.526	0.477	0.623	0.475	0.416	0.935	0.622	0.672	0.468	0.478	0.866	0.452	0.765	0.438	0.691	0.482	0.534	0.459	0.676	0.659	0.443	0.828	0.642	0.81
S41	0.355	0.884	0.891	0.915	0.85	0.859	0.828	0.755	0.819	0.65	0.874	0.416	0.908	0.823	0.847	0.893	0.961	0.921	0.883	0.376	0.859	0.935	0.915	0.996	0.935	0.855	0.792	0.866	0.793	0.882	0.368	0.87	0.907	0.923	0.834	0.366	0.847	0.919	0.828	0.89	0.882	0.827	0.85	0.839	0.893	0.85	0.911	0.792	0.896
S42	0.776	0.569	0.612	0.689	0.47	0.553	0.372	0.536	0.514	0.848	0.628	0.962	0.744	0.417	0.512	0.691	0.957	0.687	0.56	0.695	0.475	0.63	0.79	0.995	0.82	0.524	0.374	0.49	0.557	0.622	0.808	0.567	0.662	0.671	0.4	0.83	0.491	0.542	0.426	0.584	0.649	0.608	0.449	0.408	0.667	0.607	0.795	0.326	0.606
S43	0.811	0.526	0.616	0.662	0.569	0.597	0.605	0.574	0.567	0.734	0.581	0.915	0.757	0.476	0.668	0.636	0.914	0.697	0.709	0.765	0.453	0.66	0.687	0.971	0.737	0.548	0.504	0.536	0.624	0.605	0.83	0.48	0.599	0.635	0.532	0.838	0.467	0.716	0.517	0.582	0.644	0.685	0.453	0.499	0.62	0.631	0.703	0.606	0.769
S44	0.84	0.757	0.88	0.775	0.908	0.74	0.874	0.831	0.802	0.743	0.843	0.933	0.834	0.795	0.825	0.902	0.851	0.878	0.924	0.877	0.855	0.75	0.853	0.953	0.825	0.871	0.824	0.822	0.883	0.811	0.922	0.855	0.862	0.929	0.851	0.939	0.836	0.928	0.856	0.781	0.824	0.844	0.892	0.822	0.814	0.787	0.826	0.865	0.895
S45	0.946	0.822	0.961	0.883	0.955	0.958	0.97	0.953	0.932	0.919	0.896	0.776	0.888	0.945	0.78	0.902	0.628	0.815	0.95	0.946	0.957	0.878	0.672	0.646	0.709	0.884	0.956	0.846	0.935	0.971	0.969	0.844	0.965	0.899	0.952	0.992	0.949	0.901	0.915	0.932	0.898	0.811	0.964	0.955	0.845	0.784	0.597	0.93	0.923
S46	0.91	0.682	0.535	0.32	0.59	0.686	0.784	0.8	0.812	0.85	0.362	0.956	0.829	0.705	0.746	0.469	0.953	0.806	0.767	0.839	0.621	0.638	0.916	0.987	0.935	0.58	0.712	0.627	0.627	0.369	0.95	0.559	0.511	0.262	0.53	0.908	0.452	0.625	0.696	0.578	0.303	0.667	0.466	0.64	0.578	0.515	0.802	0.749	0.835
S47	0.884	0.766	0.754	0.838	0.718	0.673	0.733	0.686	0.551	0.844	0.829	0.932	0.699	0.619	0.714	0.838	0.82	0.752	0.807	0.801	0.782	0.784	0.587	0.841	0.695	0.65	0.557	0.642	0.709	0.805	0.886	0.782	0.866	0.921	0.695	0.881	0.667	0.946	0.571	0.675	0.854	0.7	0.652	0.725	0.811	0.611	0.655	0.737	0.823
S48	0.775	0.449	0.494	0.535	0.581	0.621	0.586	0.672	0.679	0.742	0.495	0.942	0.754	0.47	0.642	0.558	0.943	0.718	0.816	0.768	0.621	0.518	0.85	0.975	0.773	0.459	0.627	0.431	0.637	0.517	0.805	0.419	0.544	0.573	0.579	0.876	0.472	0.605	0.513	0.486	0.479	0.698	0.324	0.675	0.522	0.645	0.759	0.672	0.78
S49	0.809	0.641	0.654	0.717	0.45	0.484	0.551	0.592	0.471	0.883	0.707	0.972	0.686	0.468	0.632	0.749	0.979	0.632	0.761	0.819	0.473	0.663	0.834	0.985	0.793	0.506	0.372	0.42	0.549	0.685	0.911	0.661	0.727	0.751	0.613	0.852	0.551	0.794	0.418	0.65	0.705	0.606	0.565	0.568	0.672	0.683	0.856	0.542	0.825
S50	0.306	0.917	0.946	0.959	0.932	0.93	0.914	0.855	0.931	0.764	0.953	0.38	0.943	0.902	0.906	0.959	0.98	0.937	0.926	0.46	0.928	0.926	0.956	0.999	0.961	0.936	0.906	0.935	0.918	0.921	0.294	0.915	0.926	0.958	0.93	0.161	0.915	0.965	0.918	0.927	0.949	0.92	0.928	0.91	0.97	0.912	0.949	0.882	0.91
S51	0.815	0.583	0.43	0.542	0.632	0.596	0.776	0.736	0.655	0.756	0.541	0.888	0.863	0.621	0.668	0.471	0.909	0.719	0.859	0.804	0.643	0.562	0.842	0.938	0.903	0.518	0.628	0.504	0.733	0.555	0.863	0.551	0.589	0.616	0.642	0.863	0.573	0.636	0.567	0.335	0.33	0.783	0.524	0.668	0.357	0.637	0.818	0.644	0.802
S52	0.886	0.851	0.884	0.787	0.83	0.857	0.62	0.885	0.864	0.819	0.722	0.929	0.733	0.816	0.647	0.781	0.788	0.81	0.471	0.839	0.911	0.911	0.706	0.812	0.778	0.758	0.849	0.859	0.788	0.836	0.876	0.827	0.881	0.83	0.68	0.934	0.823	0.531	0.777	0.885	0.792	0.795	0.773	0.668	0.856	0.687	0.698	0.716	0.64
S53	0.918	0.653	0.491	0.498	0.753	0.633	0.831	0.794	0.804	0.782	0.564	0.978	0.935	0.767	0.855	0.521	0.969	0.823	0.911	0.891	0.7	0.633	0.91	0.985	0.926	0.627	0.689	0.644	0.887	0.573	0.959	0.632	0.678	0.65	0.746	0.923	0.654	0.669	0.691	0.467	0.455	0.866	0.631	0.72	0.44	0.769	0.945	0.783	0.878
S54	0.176	0.759	0.919	0.914	0.797	0.836	0.683	0.622	0.802	0.689	0.906	0.383	0.805	0.64	0.755	0.921	0.972	0.819	0.806	0.301	0.754	0.783	0.912	0.995	0.829	0.831	0.745	0.773	0.727	0.857	0.234	0.757	0.845	0.899	0.794	0.258	0.76	0.916	0.762	0.805	0.903	0.729	0.756	0.804	0.945	0.794	0.821	0.681	0.831
S55	0.954	0.88	0.833	0.879	0.854	0.828	0.692	0.914	0.769	0.887	0.867	0.956	0.87	0.77	0.731	0.88	0.817	0.915	0.448	0.899	0.928	0.95	0.757	0.844	0.804	0.837	0.789	0.752	0.845	0.91	0.919	0.86	0.963	0.97	0.751	0.962	0.855	0.5	0.766	0.919	0.878	0.882	0.853	0.693	0.841	0.797	0.781	0.79	0.713
S56	0.586	0.783	0.878	0.852	0.78	0.736	0.7	0.52	0.711	0.644	0.8	0.671	0.805	0.698	0.75	0.833	0.912	0.81	0.735	0.426	0.651	0.802	0.858	0.967	0.832	0.829	0.719	0.852	0.679	0.845	0.578	0.765	0.795	0.797	0.774	0.557	0.785	0.869	0.773	0.836	0.89	0.681	0.813	0.705	0.874	0.788	0.772	0.569	0.833
S57	0.894	0.823	0.812	0.572	0.682	0.808	0.623	0.791	0.739	0.909	0.558	0.926	0.745	0.757	0.599	0.771	0.842	0.794	0.673	0.808	0.801	0.8	0.775	0.881	0.83	0.698	0.783	0.84	0.62	0.575	0.926	0.723	0.786	0.613	0.424	0.892	0.581	0.726	0.767	0.728	0.614	0.608	0.638	0.652	0.809	0.434	0.79	0.681	0.687
S58	0.821	0.683	0.861	0.808	0.571	0.802	0.625	0.757	0.703	0.852	0.813	0.922	0.561	0.678	0.444	0.859	0.788	0.722	0.821	0.786	0.558	0.738	0.63	0.834	0.704	0.545	0.691	0.666	0.699	0.842	0.838	0.76	0.875	0.931	0.703	0.926	0.644	0.929	0.63	0.726	0.832	0.704	0.692	0.692	0.828	0.624	0.563	0.746	0.823
S59	0.816	0.538	0.511	0.548	0.683	0.685	0.757	0.74	0.775	0.888	0.591	0.95	0.834	0.638	0.658	0.561	0.924	0.708	0.84	0.848	0.627	0.46	0.878	0.984	0.873	0.574	0.625	0.443	0.787	0.59	0.906	0.595	0.624	0.668	0.677	0.896	0.573	0.644	0.674	0.488	0.46	0.802	0.577	0.662	0.48	0.688	0.68	0.718	0.798
S60	0.833	0.613	0.514	0.658	0.389	0.553	0.588	0.727	0.646	0.822	0.563	0.94	0.574	0.568	0.532	0.639	0.933	0.597	0.755	0.863	0.375	0.621	0.866	0.956	0.856	0.279	0.526	0.484	0.639	0.578	0.919	0.577	0.662	0.657	0.593	0.854	0.528	0.688	0.364	0.537	0.636	0.717	0.477	0.593	0.597	0.707	0.794	0.664	0.833
S61	0.919	0.66	0.405	0.698	0.653	0.476	0.817	0.804	0.642	0.839	0.652	0.974	0.934	0.62	0.828	0.696	0.941	0.825	0.913	0.917	0.702	0.75	0.907	0.982	0.938	0.6	0.621	0.431	0.811	0.622	0.973	0.711	0.725	0.732	0.696	0.92	0.659	0.736	0.569	0.679	0.656	0.869	0.634	0.742	0.64	0.791	0.94	0.796	0.875
S62	0.912	0.71	0.567	0.379	0.593	0.793	0.805	0.829	0.794	0.944	0.457	0.942	0.86	0.749	0.766	0.542	0.926	0.712	0.856	0.9	0.718	0.626	0.943	0.966	0.945	0.591	0.765	0.676	0.696	0.447	0.961	0.603	0.574	0.425	0.585	0.912	0.503	0.637	0.773	0.493	0.276	0.688	0.494	0.776	0.475	0.571	0.903	0.783	0.845
S63	0.474	0.829	0.944	0.854	0.83	0.843	0.757	0.685	0.758	0.696	0.875	0.616	0.786	0.777	0.788	0.844	0.949	0.838	0.816	0.439	0.819	0.832	0.82	0.955	0.801	0.814	0.799	0.825	0.76	0.885	0.501	0.797	0.878	0.914	0.796	0.577	0.819	0.931	0.784	0.854	0.895	0.754	0.769	0.813	0.911	0.782	0.761	0.723	0.867
S64	0.853	0.631	0.449	0.593	0.52	0.64	0.696	0.702	0.65	0.881	0.515	0.973	0.798	0.588	0.675	0.523	0.904	0.713	0.797	0.838	0.529	0.559	0.835	0.98	0.876	0.474	0.544	0.486	0.68	0.602	0.918	0.558	0.634	0.651	0.553	0.877	0.516	0.66	0.502	0.327	0.402	0.735	0.458	0.572	0.419	0.742	0.841	0.624	0.834
S65	0.9	0.814	0.773	0.708	0.67	0.667	0.628	0.715	0.558	0.826	0.699	0.907	0.785	0.654	0.646	0.687	0.842	0.789	0.661	0.766	0.723	0.894	0.759	0.864	0.773	0.668	0.593	0.674	0.577	0.774	0.88	0.723	0.787	0.777	0.638	0.876	0.726	0.755	0.599	0.836	0.766	0.657	0.695	0.578	0.748	0.614	0.735	0.626	0.712
S66	0.913	0.649	0.565	0.578	0.649	0.598	0.581	0.755	0.635	0.847	0.595	0.969	0.942	0.611	0.665	0.677	0.959	0.807	0.582	0.845	0.68	0.67	0.887	0.967	0.893	0.612	0.623	0.569	0.792	0.665	0.93	0.639	0.69	0.699	0.536	0.915	0.587	0.373	0.613	0.647	0.643	0.839	0.585	0.574	0.541	0.765	0.94	0.647	0.642
S67	0.744	0.613	0.718	0.743	0.361	0.66	0.502	0.587	0.563	0.847	0.682	0.943	0.567	0.466	0.446	0.725	0.947	0.603	0.738	0.76	0.344	0.657	0.72	0.972	0.826	0.408	0.478	0.55	0.533	0.696	0.839	0.605	0.691	0.748	0.557	0.833	0.524	0.762	0.442	0.574	0.686	0.606	0.521	0.565	0.721	0.603	0.748	0.572	0.746
S68	0.84	0.608	0.906	0.815	0.729	0.865	0.589	0.764	0.795	0.855	0.814	0.936	0.662	0.686	0.572	0.835	0.695	0.748	0.754	0.814	0.764	0.743	0.556	0.717	0.537	0.646	0.773	0.618	0.659	0.816	0.778	0.681	0.852	0.892	0.751	0.913	0.651	0.923	0.712	0.782	0.832	0.694	0.587	0.755	0.888	0.629	0.419	0.778	0.858
S69	0.852	0.626	0.592	0.42	0.449	0.608	0.727	0.758	0.668	0.881	0.411	0.942	0.849	0.561	0.68	0.584	0.956	0.774	0.817	0.836	0.668	0.681	0.868	0.981	0.917	0.54	0.604	0.549	0.534	0.408	0.886	0.615	0.619	0.438	0.489	0.866	0.419	0.684	0.594	0.641	0.404	0.631	0.442	0.681	0.601	0.504	0.886	0.694	0.797
S70	0.734	0.684	0.811	0.73	0.666	0.746	0.44	0.641	0.628	0.945	0.699	0.922	0.772	0.549	0.503	0.766	0.919	0.71	0.464	0.724	0.685	0.616	0.754	0.954	0.87	0.663	0.632	0.711	0.682	0.729	0.815	0.663	0.684	0.751	0.444	0.848	0.648	0.509	0.633	0.64	0.726	0.677	0.622	0.523	0.795	0.53	0.722	0.505	0.521
S71	0.819	0.753	0.828	0.871	0.705	0.664	0.747	0.667	0.589	0.894	0.847	0.933	0.729	0.615	0.718	0.868	0.801	0.84	0.839	0.831	0.726	0.649	0.706	0.822	0.677	0.746	0.626	0.712	0.654	0.872	0.897	0.78	0.887	0.932	0.762	0.893	0.783	0.953	0.616	0.75	0.869	0.666	0.766	0.816	0.855	0.606	0.648	0.723	0.86
S72	0.935	0.916	0.929	0.928	0.922	0.908	0.947	0.917	0.888	0.892	0.887	0.836	0.907	0.896	0.872	0.961	0.877	0.858	0.979	0.923	0.918	0.92	0.907	0.888	0.965	0.916	0.939	0.967	0.959	0.928	0.97	0.936	0.724	0.93	0.868	0.982	0.912	0.899	0.841	0.859	0.952	0.854	0.939	0.922	0.825	0.917	0.939	0.902	0.928
S73	0.747	0.585	0.696	0.656	0.567	0.596	0.627	0.645	0.541	0.864	0.623	0.918	0.739	0.497	0.564	0.723	0.934	0.755	0.666	0.751	0.601	0.604	0.725	0.966	0.835	0.61	0.566	0.631	0.54	0.636	0.854	0.631	0.609	0.633	0.57	0.832	0.577	0.844	0.557	0.637	0.645	0.634	0.547	0.64	0.734	0.467	0.641	0.678	0.748
S74	0.84	0.627	0.53	0.426	0.499	0.669	0.58	0.694	0.711	0.952	0.427	0.969	0.797	0.574	0.551	0.543	0.96	0.748	0.67	0.743	0.597	0.515	0.882	0.998	0.881	0.54	0.613	0.596	0.602	0.44	0.875	0.507	0.564	0.474	0.341	0.864	0.404	0.536	0.622	0.471	0.385	0.63	0.418	0.547	0.602	0.484	0.86	0.534	0.673
S75	0.808	0.686	0.75	0.786	0.57	0.696	0.567	0.679	0.609	0.832	0.775	0.934	0.623	0.609	0.588	0.766	0.737	0.686	0.765	0.752	0.633	0.767	0.538	0.741	0.599	0.549	0.585	0.668	0.613	0.801	0.77	0.707	0.806	0.876	0.714	0.865	0.657	0.889	0.533	0.68	0.842	0.663	0.594	0.654	0.774	0.636	0.602	0.693	0.825
S76	0.853	0.771	0.932	0.969	0.671	0.867	0.613	0.767	0.839	0.942	0.973	0.982	0.593	0.794	0.653	0.964	0.957	0.715	0.813	0.864	0.573	0.805	0.871	0.997	0.794	0.636	0.8	0.814	0.772	0.895	0.852	0.807	0.876	0.946	0.841	0.903	0.782	0.945	0.829	0.823	0.954	0.787	0.768	0.784	0.975	0.836	0.788	0.767	0.907
S77	0.304	0.861	0.943	0.943	0.868	0.877	0.781	0.716	0.777	0.747	0.936	0.437	0.844	0.73	0.789	0.936	0.968	0.87	0.853	0.311	0.82	0.782	0.895	0.987	0.893	0.878	0.777	0.889	0.803	0.874	0.343	0.829	0.888	0.928	0.805	0.339	0.818	0.961	0.837	0.798	0.936	0.787	0.859	0.839	0.964	0.759	0.865	0.765	0.814
S78	0.804	0.538	0.407	0.582	0.471	0.471	0.593	0.585	0.536	0.818	0.561	0.959	0.726	0.486	0.624	0.548	0.939	0.667	0.763	0.784	0.447	0.461	0.833	0.981	0.806	0.467	0.413	0.456	0.596	0.569	0.887	0.496	0.62	0.665	0.541	0.845	0.451	0.644	0.417	0.39	0.505	0.625	0.404	0.577	0.471	0.699	0.827	0.548	0.794
S79	0.3	0.942	0.96	0.952	0.928	0.936	0.886	0.846	0.919	0.734	0.936	0.371	0.928	0.919	0.892	0.952	0.96	0.937	0.895	0.433	0.926	0.952	0.94	0.99	0.956	0.923	0.912	0.949	0.907	0.94	0.276	0.921	0.933	0.941	0.902	0.165	0.943	0.942	0.914	0.943	0.964	0.902	0.936	0.906	0.969	0.896	0.937	0.844	0.918
S80	0.798	0.553	0.453	0.54	0.635	0.571	0.697	0.687	0.666	0.722	0.55	0.815	0.807	0.619	0.678	0.522	0.947	0.703	0.828	0.795	0.604	0.511	0.837	0.915	0.844	0.532	0.572	0.535	0.758	0.517	0.867	0.527	0.574	0.63	0.628	0.851	0.549	0.649	0.583	0.402	0.462	0.629	0.486	0.598	0.431	0.672	0.809	0.606	0.824
S81	0.229	0.718	0.835	0.83	0.743	0.754	0.664	0.606	0.723	0.684	0.803	0.397	0.791	0.674	0.725	0.848	0.973	0.759	0.811	0.329	0.687	0.724	0.892	0.993	0.825	0.764	0.682	0.732	0.723	0.785	0.279	0.703	0.794	0.809	0.735	0.29	0.718	0.846	0.712	0.766	0.823	0.728	0.687	0.752	0.86	0.721	0.802	0.643	0.807
S82	0.893	0.527	0.449	0.516	0.595	0.591	0.639	0.638	0.535	0.791	0.518	0.934	0.849	0.502	0.739	0.502	0.938	0.773	0.848	0.81	0.561	0.563	0.791	0.942	0.735	0.524	0.481	0.484	0.685	0.605	0.891	0.384	0.646	0.638	0.593	0.885	0.462	0.64	0.521	0.517	0.483	0.678	0.383	0.692	0.451	0.642	0.862	0.666	0.788
S83	0.982	0.975	0.949	0.959	0.988	0.968	0.978	0.985	0.961	0.894	0.966	0.816	0.97	0.993	0.93	0.978	0.924	0.912	0.994	0.97	0.985	0.964	0.978	0.817	0.994	0.935	0.988	0.981	0.981	0.941	0.986	0.98	0.942	0.946	0.978	0.99	0.982	0.967	0.994	0.993	0.946	0.844	0.982	0.989	0.8	0.975	0.939	0.949	0.983
S84	0.907	0.643	0.687	0.678	0.739	0.737	0.583	0.789	0.781	0.894	0.636	0.954	0.895	0.732	0.679	0.64	0.933	0.788	0.367	0.84	0.61	0.712	0.911	0.988	0.944	0.624	0.722	0.664	0.807	0.653	0.919	0.629	0.602	0.554	0.55	0.907	0.665	0.219	0.695	0.664	0.655	0.834	0.635	0.535	0.71	0.738	0.801	0.586	0.646
S85	0.814	0.742	0.706	0.835	0.722	0.656	0.758	0.762	0.626	0.859	0.82	0.967	0.837	0.662	0.776	0.838	0.964	0.817	0.84	0.733	0.721	0.825	0.72	0.992	0.855	0.734	0.652	0.711	0.716	0.771	0.862	0.751	0.805	0.854	0.762	0.856	0.741	0.865	0.676	0.769	0.798	0.773	0.696	0.768	0.821	0.733	0.824	0.75	0.845
S86	0.776	0.472	0.55	0.609	0.567	0.679	0.593	0.678	0.673	0.934	0.632	0.973	0.67	0.579	0.5	0.578	0.968	0.6	0.774	0.782	0.475	0.352	0.859	0.986	0.843	0.482	0.588	0.429	0.664	0.64	0.873	0.493	0.614	0.655	0.585	0.855	0.523	0.661	0.538	0.388	0.542	0.696	0.466	0.61	0.582	0.637	0.655	0.613	0.775
S87	0.813	0.612	0.718	0.658	0.556	0.618	0.392	0.583	0.618	0.868	0.591	0.946	0.757	0.558	0.523	0.708	0.925	0.721	0.452	0.722	0.56	0.697	0.857	0.975	0.798	0.596	0.532	0.649	0.615	0.609	0.85	0.592	0.656	0.641	0.387	0.832	0.564	0.441	0.593	0.686	0.63	0.636	0.553	0.424	0.721	0.593	0.832	0.39	0.603
S88	0.839	0.762	0.916	0.855	0.779	0.89	0.784	0.778	0.782	0.917	0.804	0.809	0.714	0.748	0.628	0.886	0.821	0.705	0.828	0.808	0.777	0.766	0.797	0.922	0.834	0.773	0.806	0.715	0.76	0.881	0.878	0.776	0.865	0.925	0.734	0.913	0.763	0.853	0.754	0.802	0.875	0.708	0.778	0.782	0.851	0.724	0.613	0.767	0.827
S89	0.33	0.929	0.941	0.966	0.88	0.927	0.86	0.779	0.796	0.735	0.929	0.36	0.898	0.879	0.865	0.953	0.945	0.921	0.913	0.419	0.83	0.876	0.922	0.995	0.934	0.906	0.876	0.933	0.863	0.929	0.28	0.872	0.892	0.948	0.834	0.245	0.889	0.951	0.87	0.866	0.959	0.859	0.898	0.894	0.969	0.836	0.898	0.816	0.892
S90	0.766	0.622	0.76	0.787	0.568	0.62	0.533	0.462	0.507	0.825	0.768	0.964	0.73	0.451	0.626	0.796	0.965	0.7	0.759	0.68	0.513	0.656	0.737	0.982	0.748	0.649	0.497	0.635	0.568	0.75	0.817	0.65	0.773	0.828	0.639	0.798	0.561	0.832	0.562	0.664	0.784	0.56	0.551	0.646	0.748	0.69	0.807	0.521	0.763
S91	0.787	0.515	0.487	0.477	0.604	0.432	0.669	0.663	0.57	0.827	0.554	0.965	0.802	0.487	0.717	0.551	0.969	0.737	0.818	0.767	0.567	0.535	0.82	0.979	0.807	0.529	0.506	0.428	0.693	0.584	0.867	0.553	0.643	0.652	0.636	0.843	0.538	0.69	0.553	0.594	0.583	0.769	0.512	0.665	0.54	0.647	0.828	0.632	0.806
S92	0.796	0.748	0.76	0.809	0.568	0.672	0.556	0.621	0.426	0.886	0.758	0.962	0.811	0.495	0.515	0.825	0.959	0.827	0.684	0.72	0.724	0.757	0.831	0.983	0.882	0.701	0.515	0.631	0.508	0.757	0.868	0.714	0.76	0.786	0.512	0.855	0.666	0.732	0.522	0.735	0.742	0.57	0.634	0.597	0.807	0.6	0.819	0.5	0.605
S93	0.767	0.635	0.694	0.834	0.492	0.591	0.484	0.579	0.49	0.785	0.787	0.963	0.674	0.444	0.59	0.809	0.964	0.655	0.731	0.719	0.565	0.638	0.868	0.987	0.766	0.564	0.457	0.577	0.506	0.706	0.825	0.634	0.744	0.827	0.627	0.833	0.554	0.845	0.469	0.601	0.792	0.587	0.503	0.587	0.795	0.672	0.787	0.581	0.785
S94	0.759	0.606	0.844	0.832	0.734	0.743	0.598	0.588	0.625	0.883	0.812	0.924	0.705	0.598	0.672	0.76	0.939	0.616	0.704	0.739	0.54	0.627	0.62	0.975	0.759	0.739	0.638	0.728	0.673	0.811	0.734	0.627	0.744	0.779	0.635	0.824	0.638	0.833	0.703	0.615	0.844	0.671	0.611	0.679	0.853	0.668	0.654	0.647	0.621
S95	0.952	0.848	0.779	0.79	0.85	0.733	0.866	0.879	0.786	0.724	0.811	0.95	0.824	0.813	0.849	0.866	0.649	0.868	0.932	0.901	0.883	0.888	0.555	0.609	0.596	0.785	0.768	0.817	0.857	0.826	0.955	0.825	0.914	0.95	0.859	0.958	0.816	0.962	0.775	0.895	0.85	0.87	0.819	0.817	0.732	0.718	0.761	0.892	0.933
S96	0.757	0.572	0.515	0.539	0.543	0.675	0.64	0.674	0.674	0.914	0.55	0.962	0.756	0.554	0.586	0.531	0.94	0.69	0.767	0.791	0.548	0.479	0.8	0.993	0.897	0.473	0.605	0.501	0.667	0.567	0.869	0.518	0.543	0.615	0.551	0.869	0.479	0.64	0.565	0.273	0.335	0.699	0.438	0.634	0.443	0.61	0.788	0.635	0.769
S97	0.984	0.923	0.917	0.88	0.971	0.89	0.972	0.978	0.934	0.858	0.927	0.966	0.952	0.982	0.932	0.959	0.917	0.908	0.981	0.942	0.96	0.968	0.925	0.922	0.917	0.941	0.929	0.949	0.976	0.862	0.978	0.964	0.926	0.944	0.967	0.986	0.911	0.961	0.969	0.976	0.885	0.941	0.958	0.875	0.822	0.91	0.95	0.93	0.972
S98	0.862	0.528	0.597	0.406	0.568	0.556	0.691	0.732	0.796	0.803	0.427	0.986	0.813	0.677	0.761	0.581	0.957	0.804	0.837	0.896	0.633	0.467	0.821	0.989	0.9	0.583	0.698	0.611	0.679	0.42	0.875	0.577	0.628	0.494	0.534	0.894	0.473	0.659	0.727	0.603	0.383	0.676	0.45	0.666	0.598	0.573	0.853	0.723	0.863
S99	0.278	0.894	0.937	0.934	0.916	0.912	0.899	0.829	0.896	0.73	0.929	0.368	0.927	0.88	0.878	0.945	0.966	0.903	0.917	0.387	0.909	0.913	0.945	0.986	0.949	0.914	0.897	0.902	0.879	0.909	0.27	0.895	0.913	0.929	0.899	0.213	0.907	0.934	0.907	0.915	0.922	0.884	0.903	0.906	0.944	0.893	0.909	0.851	0.894
S100	0.831	0.494	0.507	0.539	0.696	0.686	0.768	0.77	0.764	0.926	0.609	0.966	0.88	0.67	0.687	0.519	0.895	0.761	0.9	0.841	0.672	0.471	0.821	0.974	0.892	0.595	0.69	0.508	0.822	0.621	0.902	0.534	0.602	0.638	0.714	0.903	0.612	0.633	0.684	0.363	0.325	0.837	0.575	0.745	0.427	0.654	0.759	0.73	0.814
S101	0.917	0.681	0.633	0.588	0.664	0.568	0.776	0.711	0.64	0.767	0.554	0.926	0.878	0.737	0.766	0.646	0.855	0.723	0.863	0.873	0.676	0.777	0.836	0.895	0.886	0.581	0.611	0.701	0.8	0.595	0.958	0.674	0.713	0.707	0.669	0.912	0.683	0.745	0.575	0.697	0.647	0.735	0.662	0.71	0.569	0.686	0.838	0.685	0.86
S102	0.897	0.862	0.793	0.747	0.702	0.711	0.774	0.772	0.67	0.77	0.68	0.939	0.696	0.695	0.738	0.796	0.721	0.823	0.794	0.865	0.765	0.896	0.458	0.74	0.651	0.627	0.657	0.709	0.682	0.765	0.922	0.804	0.869	0.833	0.731	0.918	0.728	0.942	0.599	0.823	0.816	0.722	0.674	0.736	0.775	0.679	0.714	0.787	0.905
S103	0.847	0.691	0.83	0.666	0.651	0.768	0.778	0.837	0.778	0.865	0.689	0.925	0.736	0.73	0.658	0.85	0.6	0.845	0.837	0.846	0.878	0.769	0.528	0.63	0.529	0.69	0.782	0.75	0.636	0.693	0.868	0.778	0.817	0.777	0.681	0.919	0.642	0.934	0.705	0.804	0.69	0.665	0.604	0.832	0.827	0.514	0.613	0.842	0.856
S104	0.8	0.503	0.556	0.579	0.554	0.699	0.617	0.62	0.657	0.842	0.56	0.972	0.817	0.522	0.683	0.612	0.897	0.716	0.831	0.79	0.576	0.526	0.78	0.99	0.773	0.568	0.581	0.503	0.745	0.628	0.832	0.424	0.575	0.671	0.552	0.88	0.47	0.646	0.561	0.457	0.585	0.701	0.392	0.631	0.573	0.711	0.81	0.612	0.777
S105	0.904	0.68	0.565	0.36	0.607	0.74	0.81	0.83	0.851	0.97	0.459	0.985	0.89	0.723	0.787	0.51	0.981	0.815	0.853	0.866	0.72	0.627	0.935	0.997	0.941	0.631	0.736	0.67	0.699	0.472	0.944	0.612	0.613	0.438	0.58	0.907	0.49	0.651	0.743	0.536	0.304	0.717	0.515	0.769	0.538	0.567	0.933	0.786	0.842
S106	0.876	0.563	0.541	0.628	0.754	0.749	0.817	0.816	0.758	0.981	0.675	0.973	0.91	0.696	0.717	0.573	0.962	0.785	0.907	0.861	0.686	0.431	0.925	0.983	0.913	0.648	0.741	0.539	0.849	0.681	0.938	0.58	0.636	0.687	0.701	0.912	0.651	0.674	0.718	0.325	0.435	0.885	0.614	0.779	0.516	0.697	0.772	0.782	0.804
S107	0.38	0.902	0.874	0.757	0.827	0.843	0.852	0.804	0.853	0.658	0.756	0.353	0.821	0.863	0.829	0.811	0.855	0.896	0.865	0.457	0.909	0.972	0.784	0.87	0.816	0.747	0.828	0.894	0.842	0.852	0.38	0.822	0.901	0.874	0.836	0.357	0.829	0.942	0.828	0.92	0.847	0.822	0.815	0.877	0.84	0.725	0.823	0.866	0.94
S108	0.281	0.898	0.958	0.947	0.924	0.914	0.896	0.825	0.905	0.742	0.948	0.375	0.914	0.888	0.887	0.947	0.974	0.92	0.91	0.407	0.911	0.913	0.942	0.997	0.93	0.927	0.907	0.907	0.887	0.931	0.257	0.893	0.922	0.947	0.901	0.181	0.915	0.953	0.923	0.925	0.945	0.886	0.901	0.919	0.972	0.897	0.905	0.853	0.909
S109	0.841	0.778	0.816	0.809	0.629	0.687	0.658	0.746	0.634	0.719	0.8	0.945	0.703	0.686	0.662	0.916	0.948	0.745	0.833	0.831	0.701	0.771	0.729	0.96	0.826	0.68	0.674	0.711	0.686	0.808	0.819	0.814	0.845	0.909	0.736	0.91	0.732	0.944	0.617	0.733	0.858	0.714	0.679	0.679	0.777	0.789	0.732	0.732	0.899
S110	0.928	0.7	0.542	0.566	0.749	0.722	0.839	0.82	0.724	0.876	0.529	0.957	0.876	0.742	0.781	0.549	0.89	0.81	0.925	0.863	0.665	0.542	0.87	0.93	0.913	0.657	0.74	0.668	0.888	0.659	0.979	0.603	0.683	0.605	0.633	0.934	0.639	0.666	0.677	0.363	0.429	0.847	0.603	0.75	0.464	0.745	0.911	0.754	0.846
S111	0.925	0.848	0.872	0.763	0.828	0.786	0.748	0.792	0.754	0.75	0.72	0.942	0.758	0.778	0.753	0.689	0.773	0.854	0.814	0.819	0.847	0.928	0.676	0.785	0.603	0.753	0.751	0.809	0.792	0.845	0.86	0.786	0.902	0.892	0.752	0.92	0.782	0.88	0.727	0.88	0.887	0.788	0.761	0.777	0.8	0.738	0.723	0.767	0.859
S112	0.88	0.619	0.52	0.547	0.62	0.546	0.748	0.731	0.644	0.706	0.551	0.91	0.887	0.593	0.708	0.586	0.941	0.756	0.842	0.81	0.588	0.633	0.828	0.939	0.884	0.557	0.561	0.535	0.708	0.557	0.918	0.539	0.583	0.579	0.669	0.886	0.536	0.65	0.604	0.591	0.521	0.75	0.523	0.594	0.49	0.685	0.841	0.664	0.809
S113	0.831	0.776	0.717	0.706	0.583	0.622	0.685	0.6	0.405	0.784	0.66	0.931	0.718	0.573	0.658	0.747	0.865	0.743	0.776	0.79	0.645	0.74	0.754	0.899	0.777	0.601	0.461	0.541	0.552	0.747	0.907	0.713	0.824	0.836	0.618	0.859	0.661	0.878	0.434	0.622	0.791	0.568	0.632	0.669	0.682	0.623	0.742	0.608	0.815
S114	0.256	0.929	0.965	0.963	0.896	0.928	0.875	0.814	0.902	0.718	0.962	0.374	0.886	0.874	0.874	0.962	0.974	0.892	0.89	0.426	0.892	0.893	0.937	0.997	0.928	0.899	0.882	0.893	0.87	0.923	0.247	0.91	0.922	0.962	0.885	0.148	0.894	0.963	0.892	0.891	0.961	0.877	0.889	0.886	0.98	0.897	0.889	0.842	0.918
S115	0.885	0.832	0.776	0.745	0.63	0.732	0.646	0.743	0.553	0.904	0.718	0.922	0.764	0.624	0.604	0.787	0.843	0.828	0.675	0.77	0.74	0.878	0.734	0.879	0.801	0.689	0.615	0.621	0.567	0.732	0.915	0.725	0.789	0.789	0.605	0.87	0.664	0.8	0.588	0.825	0.751	0.644	0.694	0.658	0.801	0.566	0.77	0.643	0.717
S116	0.966	0.903	0.853	0.619	0.675	0.789	0.877	0.896	0.826	0.834	0.578	0.946	0.762	0.827	0.806	0.817	0.792	0.901	0.868	0.94	0.927	0.972	0.733	0.811	0.749	0.742	0.813	0.834	0.649	0.656	0.966	0.848	0.885	0.667	0.706	0.956	0.677	0.939	0.732	0.931	0.649	0.692	0.67	0.839	0.818	0.573	0.752	0.879	0.945
S117	0.91	0.674	0.645	0.415	0.502	0.572	0.769	0.753	0.709	0.693	0.339	0.925	0.736	0.676	0.704	0.614	0.815	0.752	0.806	0.891	0.706	0.79	0.765	0.883	0.823	0.519	0.635	0.675	0.592	0.368	0.96	0.652	0.664	0.474	0.49	0.906	0.474	0.75	0.522	0.707	0.43	0.641	0.495	0.599	0.602	0.444	0.76	0.715	0.848
S118	0.818	0.63	0.568	0.738	0.564	0.501	0.724	0.664	0.437	0.815	0.684	0.888	0.815	0.477	0.701	0.723	0.964	0.685	0.861	0.807	0.661	0.669	0.839	0.983	0.896	0.611	0.493	0.536	0.668	0.622	0.89	0.654	0.722	0.757	0.575	0.857	0.579	0.705	0.519	0.627	0.654	0.688	0.586	0.651	0.652	0.623	0.85	0.695	0.727
S119	0.342	0.955	0.967	0.977	0.975	0.968	0.963	0.899	0.961	0.762	0.973	0.382	0.95	0.949	0.942	0.981	0.98	0.97	0.97	0.494	0.959	0.951	0.963	0.996	0.973	0.971	0.949	0.96	0.946	0.963	0.306	0.95	0.967	0.984	0.959	0.207	0.948	0.982	0.964	0.96	0.95	0.964	0.96	0.957	0.987	0.93	0.96	0.935	0.947
S120	0.787	0.611	0.656	0.663	0.502	0.591	0.568	0.625	0.484	0.838	0.6	0.933	0.697	0.421	0.51	0.695	0.925	0.678	0.717	0.71	0.527	0.652	0.7	0.952	0.817	0.498	0.498	0.454	0.511	0.621	0.838	0.59	0.692	0.689	0.545	0.857	0.512	0.78	0.434	0.626	0.658	0.602	0.466	0.618	0.709	0.484	0.709	0.568	0.76
S121	0.364	0.839	0.829	0.735	0.73	0.815	0.788	0.739	0.771	0.712	0.717	0.436	0.82	0.79	0.745	0.851	0.965	0.835	0.833	0.391	0.824	0.856	0.85	0.984	0.922	0.784	0.73	0.85	0.717	0.704	0.419	0.788	0.778	0.718	0.662	0.364	0.679	0.863	0.8	0.846	0.723	0.716	0.675	0.803	0.874	0.664	0.899	0.761	0.782
S122	0.458	0.815	0.957	0.953	0.832	0.898	0.763	0.662	0.837	0.709	0.937	0.646	0.73	0.763	0.761	0.901	0.965	0.805	0.799	0.441	0.81	0.813	0.927	0.989	0.856	0.844	0.799	0.768	0.715	0.897	0.49	0.836	0.902	0.939	0.822	0.544	0.816	0.93	0.828	0.836	0.916	0.788	0.808	0.803	0.967	0.824	0.788	0.715	0.864
S123	0.859	0.716	0.762	0.54	0.579	0.716	0.737	0.715	0.739	0.924	0.529	0.806	0.785	0.673	0.664	0.737	0.861	0.659	0.806	0.799	0.694	0.74	0.832	0.94	0.899	0.671	0.699	0.748	0.665	0.611	0.919	0.664	0.709	0.6	0.516	0.883	0.556	0.706	0.717	0.722	0.609	0.626	0.581	0.671	0.678	0.523	0.875	0.691	0.78
S124	0.832	0.59	0.551	0.736	0.502	0.511	0.668	0.599	0.494	0.772	0.642	0.953	0.841	0.47	0.742	0.723	0.891	0.76	0.773	0.822	0.562	0.747	0.756	0.995	0.814	0.626	0.438	0.542	0.618	0.644	0.854	0.592	0.612	0.68	0.563	0.859	0.547	0.77	0.443	0.646	0.691	0.661	0.551	0.579	0.682	0.673	0.787	0.613	0.777
S125	0.433	0.81	0.731	0.845	0.695	0.709	0.755	0.645	0.601	0.615	0.789	0.517	0.834	0.67	0.769	0.843	0.953	0.837	0.837	0.353	0.761	0.864	0.867	0.978	0.896	0.718	0.579	0.755	0.626	0.787	0.492	0.778	0.843	0.88	0.761	0.422	0.759	0.886	0.578	0.782	0.835	0.689	0.734	0.784	0.805	0.746	0.864	0.665	0.835
S126	0.84	0.537	0.418	0.512	0.662	0.572	0.694	0.672	0.626	0.795	0.504	0.962	0.774	0.612	0.687	0.48	0.949	0.712	0.848	0.762	0.572	0.5	0.834	0.975	0.797	0.497	0.57	0.527	0.729	0.504	0.873	0.477	0.569	0.588	0.583	0.868	0.532	0.623	0.538	0.414	0.458	0.741	0.45	0.642	0.48	0.61	0.785	0.649	0.768
S127	0.879	0.801	0.825	0.852	0.709	0.72	0.741	0.601	0.532	0.827	0.847	0.97	0.822	0.604	0.764	0.892	0.971	0.856	0.855	0.804	0.747	0.796	0.851	0.99	0.84	0.76	0.561	0.538	0.623	0.821	0.878	0.817	0.901	0.937	0.741	0.911	0.698	0.945	0.609	0.768	0.842	0.672	0.729	0.764	0.828	0.752	0.829	0.694	0.861
S128	0.877	0.786	0.906	0.866	0.713	0.9	0.716	0.825	0.817	0.885	0.921	0.975	0.704	0.815	0.591	0.974	0.91	0.755	0.863	0.874	0.685	0.715	0.87	0.979	0.883	0.696	0.787	0.785	0.795	0.909	0.909	0.856	0.891	0.928	0.815	0.944	0.757	0.942	0.827	0.718	0.901	0.813	0.827	0.793	0.894	0.773	0.808	0.864	0.858
S129	0.899	0.675	0.561	0.366	0.607	0.785	0.825	0.833	0.853	0.981	0.477	0.978	0.883	0.731	0.784	0.578	0.925	0.782	0.87	0.893	0.734	0.613	0.917	0.993	0.939	0.634	0.772	0.685	0.706	0.475	0.944	0.586	0.624	0.448	0.596	0.93	0.473	0.636	0.756	0.541	0.315	0.728	0.538	0.796	0.559	0.573	0.942	0.81	0.836
S130	0.803	0.595	0.599	0.684	0.63	0.465	0.729	0.71	0.571	0.773	0.662	0.936	0.87	0.538	0.689	0.72	0.96	0.786	0.86	0.818	0.699	0.677	0.822	0.969	0.893	0.651	0.56	0.428	0.695	0.662	0.886	0.696	0.7	0.747	0.694	0.895	0.666	0.793	0.526	0.664	0.667	0.773	0.59	0.652	0.646	0.645	0.775	0.688	0.797
S131	0.746	0.79	0.802	0.639	0.654	0.788	0.559	0.726	0.801	0.839	0.653	0.783	0.768	0.712	0.583	0.676	0.872	0.631	0.468	0.718	0.745	0.749	0.877	0.872	0.855	0.625	0.735	0.749	0.747	0.67	0.787	0.708	0.724	0.682	0.499	0.776	0.65	0.461	0.696	0.729	0.709	0.711	0.65	0.555	0.716	0.636	0.814	0.549	0.571
S132	0.361	0.818	0.857	0.83	0.847	0.797	0.741	0.76	0.838	0.741	0.854	0.462	0.906	0.829	0.76	0.766	0.961	0.731	0.733	0.342	0.783	0.848	0.884	0.996	0.917	0.836	0.8	0.853	0.818	0.824	0.368	0.811	0.785	0.794	0.77	0.372	0.829	0.807	0.846	0.834	0.871	0.858	0.815	0.686	0.89	0.785	0.833	0.703	0.673
S133	0.82	0.745	0.95	0.945	0.816	0.902	0.575	0.78	0.808	0.95	0.946	0.936	0.828	0.734	0.559	0.948	0.94	0.819	0.376	0.784	0.809	0.773	0.849	0.995	0.887	0.842	0.773	0.711	0.774	0.904	0.83	0.817	0.881	0.923	0.628	0.916	0.76	0.475	0.802	0.787	0.902	0.76	0.775	0.646	0.965	0.785	0.725	0.66	0.59
S134	0.835	0.564	0.49	0.397	0.363	0.591	0.615	0.647	0.607	0.83	0.37	0.964	0.729	0.503	0.618	0.616	0.937	0.706	0.761	0.783	0.545	0.585	0.814	0.988	0.838	0.442	0.508	0.433	0.486	0.365	0.861	0.491	0.559	0.44	0.393	0.869	0.264	0.631	0.491	0.498	0.36	0.549	0.264	0.595	0.57	0.504	0.822	0.629	0.789
S135	0.846	0.628	0.657	0.428	0.532	0.686	0.684	0.71	0.701	0.91	0.457	0.957	0.799	0.618	0.703	0.565	0.966	0.765	0.698	0.778	0.556	0.664	0.84	0.974	0.847	0.565	0.609	0.6	0.583	0.399	0.855	0.583	0.506	0.357	0.419	0.881	0.366	0.695	0.678	0.654	0.475	0.62	0.438	0.621	0.714	0.494	0.769	0.703	0.745
S136	0.907	0.693	0.579	0.574	0.78	0.692	0.855	0.841	0.812	0.879	0.635	0.831	0.927	0.76	0.821	0.509	0.941	0.654	0.831	0.863	0.678	0.67	0.953	0.893	0.96	0.635	0.749	0.688	0.853	0.623	0.946	0.64	0.57	0.434	0.767	0.916	0.685	0.622	0.721	0.616	0.64	0.775	0.669	0.718	0.571	0.797	0.851	0.776	0.758
S137	0.797	0.748	0.745	0.607	0.378	0.689	0.535	0.565	0.516	0.861	0.593	0.965	0.64	0.593	0.521	0.793	0.956	0.685	0.7	0.723	0.583	0.741	0.842	0.995	0.874	0.533	0.493	0.703	0.356	0.518	0.857	0.699	0.714	0.61	0.428	0.85	0.403	0.843	0.528	0.62	0.592	0.39	0.479	0.575	0.84	0.43	0.799	0.592	0.741
S138	0.911	0.655	0.637	0.461	0.482	0.624	0.545	0.744	0.643	0.835	0.443	0.971	0.866	0.572	0.614	0.675	0.957	0.809	0.679	0.821	0.664	0.761	0.844	0.979	0.864	0.586	0.561	0.566	0.575	0.455	0.899	0.622	0.673	0.509	0.304	0.905	0.398	0.541	0.63	0.718	0.443	0.618	0.437	0.521	0.645	0.524	0.921	0.591	0.617
S139	0.81	0.825	0.903	0.808	0.555	0.845	0.51	0.724	0.737	0.918	0.778	0.943	0.598	0.636	0.49	0.879	0.931	0.728	0.679	0.749	0.634	0.84	0.777	0.97	0.85	0.601	0.657	0.775	0.579	0.765	0.819	0.755	0.735	0.82	0.597	0.884	0.626	0.862	0.622	0.744	0.8	0.603	0.636	0.641	0.899	0.652	0.789	0.653	0.713
S140	0.918	0.63	0.503	0.33	0.56	0.662	0.774	0.744	0.784	0.771	0.266	0.941	0.854	0.693	0.715	0.504	0.919	0.776	0.853	0.873	0.691	0.639	0.919	0.937	0.954	0.528	0.687	0.62	0.662	0.39	0.963	0.602	0.612	0.381	0.531	0.912	0.473	0.625	0.656	0.549	0.327	0.642	0.462	0.716	0.481	0.586	0.895	0.704	0.83
S141	0.733	0.64	0.853	0.817	0.661	0.79	0.591	0.686	0.758	0.955	0.808	0.972	0.711	0.618	0.529	0.751	0.97	0.685	0.739	0.774	0.665	0.634	0.889	0.998	0.88	0.69	0.696	0.613	0.626	0.768	0.821	0.727	0.705	0.803	0.671	0.85	0.665	0.844	0.657	0.692	0.786	0.671	0.636	0.689	0.884	0.674	0.582	0.664	0.75
S142	0.91	0.837	0.859	0.794	0.814	0.811	0.822	0.763	0.675	0.891	0.815	0.906	0.833	0.801	0.799	0.849	0.898	0.805	0.865	0.806	0.821	0.898	0.809	0.898	0.828	0.796	0.634	0.895	0.706	0.855	0.927	0.807	0.885	0.861	0.821	0.893	0.813	0.934	0.722	0.898	0.88	0.68	0.819	0.828	0.829	0.729	0.84	0.711	0.89
S143	0.802	0.719	0.788	0.827	0.728	0.721	0.743	0.779	0.671	0.885	0.837	0.935	0.724	0.609	0.624	0.841	0.613	0.792	0.824	0.819	0.787	0.757	0.525	0.631	0.492	0.69	0.65	0.672	0.706	0.798	0.887	0.742	0.845	0.914	0.758	0.906	0.709	0.939	0.603	0.732	0.832	0.742	0.716	0.745	0.831	0.634	0.61	0.784	0.81
S144	0.892	0.651	0.594	0.309	0.588	0.668	0.759	0.746	0.71	0.76	0.39	0.87	0.863	0.688	0.695	0.551	0.924	0.75	0.833	0.847	0.681	0.643	0.866	0.892	0.863	0.566	0.686	0.62	0.725	0.524	0.936	0.572	0.602	0.497	0.599	0.893	0.512	0.636	0.685	0.599	0.441	0.634	0.504	0.711	0.414	0.618	0.9	0.69	0.839
S145	0.873	0.664	0.515	0.687	0.709	0.462	0.696	0.695	0.583	0.766	0.679	0.939	0.807	0.6	0.748	0.696	0.77	0.772	0.856	0.809	0.745	0.801	0.639	0.776	0.666	0.615	0.6	0.523	0.733	0.671	0.881	0.648	0.792	0.806	0.724	0.887	0.648	0.823	0.562	0.734	0.73	0.801	0.629	0.703	0.68	0.575	0.746	0.728	0.828
S146	0.911	0.667	0.455	0.512	0.624	0.603	0.82	0.759	0.654	0.708	0.511	0.962	0.935	0.624	0.778	0.533	0.902	0.797	0.908	0.892	0.687	0.611	0.866	0.948	0.957	0.586	0.615	0.489	0.799	0.587	0.96	0.601	0.668	0.645	0.673	0.915	0.627	0.649	0.602	0.494	0.407	0.842	0.586	0.643	0.356	0.75	0.93	0.731	0.865
S147	0.925	0.821	0.833	0.827	0.844	0.833	0.662	0.858	0.861	0.971	0.828	0.982	0.956	0.839	0.747	0.778	0.956	0.65	0.517	0.882	0.835	0.855	0.949	0.988	0.978	0.814	0.826	0.84	0.908	0.82	0.943	0.817	0.84	0.819	0.679	0.915	0.823	0.405	0.84	0.809	0.802	0.921	0.836	0.626	0.841	0.809	0.948	0.691	0.337
S148	0.725	0.455	0.628	0.649	0.48	0.583	0.503	0.581	0.705	0.929	0.634	0.968	0.584	0.525	0.483	0.651	0.956	0.627	0.758	0.778	0.35	0.357	0.839	0.997	0.812	0.41	0.55	0.453	0.648	0.615	0.85	0.527	0.583	0.655	0.604	0.841	0.523	0.669	0.55	0.504	0.614	0.699	0.481	0.584	0.678	0.639	0.722	0.571	0.788
S149	0.273	0.889	0.969	0.964	0.87	0.917	0.843	0.75	0.849	0.751	0.943	0.435	0.887	0.829	0.859	0.91	0.964	0.856	0.85	0.39	0.858	0.875	0.936	0.992	0.897	0.895	0.848	0.887	0.786	0.916	0.337	0.889	0.909	0.947	0.882	0.354	0.909	0.955	0.854	0.899	0.935	0.844	0.91	0.865	0.977	0.84	0.865	0.774	0.875
S150	0.82	0.877	0.893	0.926	0.851	0.827	0.806	0.762	0.836	0.857	0.877	0.897	0.617	0.805	0.823	0.891	0.958	0.879	0.83	0.807	0.85	0.903	0.929	0.995	0.918	0.854	0.829	0.881	0.815	0.886	0.847	0.85	0.907	0.929	0.79	0.814	0.864	0.889	0.855	0.886	0.877	0.855	0.851	0.771	0.898	0.862	0.931	0.767	0.856
S151	0.893	0.82	0.95	0.915	0.929	0.922	0.648	0.871	0.884	0.965	0.924	0.925	0.85	0.84	0.669	0.901	0.892	0.846	0.301	0.821	0.834	0.85	0.862	0.964	0.88	0.879	0.904	0.864	0.831	0.914	0.867	0.761	0.803	0.79	0.726	0.937	0.846	0.465	0.895	0.872	0.888	0.862	0.864	0.668	0.948	0.758	0.724	0.756	0.664
S152	0.85	0.668	0.503	0.46	0.533	0.658	0.705	0.666	0.608	0.882	0.444	0.942	0.842	0.567	0.666	0.403	0.921	0.777	0.821	0.786	0.574	0.548	0.842	0.954	0.92	0.521	0.581	0.605	0.668	0.528	0.934	0.518	0.542	0.5	0.502	0.888	0.489	0.636	0.572	0.419	0.395	0.647	0.465	0.648	0.495	0.548	0.901	0.64	0.792
S153	0.302	0.918	0.96	0.948	0.908	0.929	0.861	0.796	0.871	0.73	0.932	0.366	0.925	0.854	0.873	0.935	0.962	0.942	0.914	0.382	0.872	0.923	0.95	0.996	0.95	0.925	0.868	0.922	0.839	0.932	0.261	0.886	0.928	0.926	0.881	0.176	0.906	0.938	0.885	0.928	0.931	0.869	0.908	0.906	0.97	0.857	0.92	0.83	0.886
S154	0.304	0.797	0.93	0.934	0.767	0.85	0.655	0.683	0.808	0.725	0.909	0.446	0.741	0.767	0.734	0.911	0.968	0.757	0.77	0.381	0.726	0.795	0.856	0.997	0.869	0.778	0.74	0.83	0.72	0.819	0.342	0.841	0.875	0.918	0.817	0.372	0.786	0.924	0.742	0.809	0.941	0.722	0.771	0.754	0.926	0.825	0.795	0.657	0.835
S155	0.877	0.684	0.88	0.593	0.684	0.738	0.777	0.816	0.771	0.869	0.644	0.969	0.82	0.774	0.705	0.88	0.964	0.904	0.871	0.857	0.85	0.799	0.815	0.976	0.804	0.799	0.775	0.746	0.606	0.626	0.861	0.84	0.854	0.683	0.647	0.926	0.62	0.92	0.812	0.902	0.614	0.638	0.638	0.764	0.861	0.559	0.751	0.785	0.889
S156	0.824	0.645	0.645	0.648	0.648	0.489	0.696	0.674	0.534	0.848	0.658	0.939	0.727	0.596	0.732	0.688	0.822	0.709	0.799	0.837	0.66	0.687	0.691	0.838	0.647	0.584	0.576	0.463	0.726	0.665	0.903	0.628	0.747	0.779	0.686	0.854	0.67	0.819	0.583	0.737	0.714	0.775	0.623	0.676	0.654	0.565	0.716	0.652	0.846
S157	0.839	0.831	0.894	0.895	0.844	0.741	0.809	0.734	0.843	0.883	0.875	0.969	0.762	0.805	0.86	0.932	0.869	0.797	0.848	0.897	0.775	0.759	0.888	0.989	0.809	0.829	0.732	0.848	0.859	0.842	0.922	0.871	0.78	0.965	0.842	0.922	0.813	0.964	0.769	0.8	0.884	0.835	0.845	0.804	0.898	0.857	0.867	0.811	0.923
S158	0.953	0.844	0.799	0.776	0.818	0.715	0.871	0.843	0.674	0.784	0.742	0.929	0.802	0.771	0.805	0.823	0.704	0.887	0.918	0.903	0.884	0.919	0.61	0.721	0.661	0.746	0.767	0.645	0.827	0.864	0.954	0.813	0.925	0.867	0.818	0.955	0.817	0.931	0.683	0.851	0.855	0.825	0.767	0.861	0.761	0.734	0.747	0.88	0.9
S159	0.74	0.435	0.545	0.602	0.607	0.695	0.593	0.625	0.677	0.883	0.626	0.967	0.739	0.506	0.575	0.585	0.963	0.681	0.782	0.745	0.528	0.396	0.827	0.989	0.801	0.546	0.582	0.366	0.674	0.606	0.793	0.45	0.528	0.657	0.589	0.851	0.482	0.648	0.52	0.414	0.552	0.705	0.404	0.641	0.618	0.632	0.637	0.606	0.775
S160	0.763	0.739	0.838	0.827	0.499	0.774	0.545	0.616	0.721	0.925	0.744	0.95	0.552	0.611	0.523	0.807	0.962	0.662	0.658	0.824	0.423	0.766	0.864	0.995	0.853	0.537	0.622	0.756	0.632	0.78	0.896	0.72	0.6	0.697	0.687	0.842	0.663	0.851	0.577	0.696	0.824	0.663	0.672	0.589	0.868	0.727	0.739	0.627	0.779
S161	0.926	0.833	0.728	0.739	0.792	0.65	0.872	0.818	0.687	0.786	0.726	0.929	0.872	0.744	0.847	0.785	0.726	0.853	0.885	0.879	0.888	0.933	0.67	0.718	0.709	0.707	0.736	0.756	0.811	0.79	0.97	0.828	0.906	0.888	0.853	0.92	0.831	0.905	0.678	0.843	0.838	0.844	0.809	0.849	0.705	0.762	0.801	0.867	0.92
S162	0.882	0.871	0.823	0.767	0.773	0.737	0.581	0.773	0.801	0.879	0.786	0.937	0.737	0.784	0.657	0.781	0.841	0.819	0.373	0.808	0.798	0.88	0.718	0.86	0.741	0.723	0.703	0.791	0.765	0.816	0.893	0.785	0.9	0.914	0.645	0.911	0.759	0.526	0.727	0.816	0.852	0.747	0.783	0.557	0.849	0.69	0.73	0.615	0.741
S163	0.899	0.814	0.716	0.563	0.557	0.706	0.753	0.788	0.64	0.836	0.536	0.937	0.721	0.693	0.742	0.771	0.816	0.825	0.796	0.825	0.793	0.9	0.704	0.837	0.745	0.638	0.653	0.738	0.535	0.557	0.939	0.758	0.803	0.633	0.616	0.881	0.581	0.902	0.605	0.826	0.613	0.568	0.596	0.776	0.785	0.447	0.737	0.79	0.869
S164	0.889	0.649	0.659	0.693	0.606	0.688	0.721	0.669	0.578	0.916	0.654	0.966	0.899	0.571	0.716	0.693	0.952	0.809	0.892	0.828	0.61	0.682	0.823	0.984	0.936	0.641	0.454	0.662	0.67	0.628	0.946	0.635	0.664	0.69	0.618	0.897	0.561	0.721	0.567	0.638	0.664	0.65	0.591	0.673	0.681	0.675	0.917	0.666	0.694
S165	0.971	0.888	0.787	0.623	0.686	0.7	0.86	0.83	0.697	0.691	0.629	0.978	0.871	0.751	0.836	0.887	0.977	0.963	0.907	0.927	0.901	0.905	0.909	0.981	0.961	0.787	0.746	0.75	0.664	0.576	0.985	0.881	0.901	0.712	0.644	0.965	0.637	0.944	0.761	0.792	0.645	0.687	0.7	0.784	0.831	0.627	0.948	0.918	0.917
S166	0.307	0.872	0.959	0.946	0.837	0.906	0.795	0.74	0.863	0.746	0.923	0.432	0.816	0.799	0.768	0.956	0.937	0.847	0.83	0.359	0.813	0.818	0.886	0.989	0.899	0.852	0.819	0.836	0.777	0.916	0.33	0.874	0.911	0.953	0.815	0.362	0.846	0.961	0.824	0.853	0.936	0.778	0.824	0.819	0.967	0.829	0.815	0.729	0.886
S167	0.903	0.81	0.86	0.881	0.84	0.876	0.871	0.889	0.847	0.918	0.831	0.945	0.844	0.843	0.783	0.878	0.38	0.753	0.906	0.92	0.889	0.866	0.553	0.511	0.447	0.747	0.864	0.821	0.845	0.84	0.926	0.697	0.877	0.92	0.833	0.939	0.852	0.903	0.816	0.867	0.851	0.891	0.869	0.825	0.844	0.715	0.709	0.898	0.892
S168	0.915	0.625	0.545	0.524	0.747	0.676	0.849	0.833	0.814	0.891	0.552	0.957	0.935	0.779	0.804	0.536	0.828	0.713	0.915	0.889	0.69	0.607	0.869	0.96	0.915	0.625	0.743	0.644	0.907	0.634	0.959	0.561	0.654	0.601	0.697	0.925	0.663	0.601	0.702	0.462	0.437	0.871	0.645	0.722	0.439	0.757	0.913	0.728	0.862
S169	0.773	0.73	0.812	0.788	0.527	0.72	0.394	0.596	0.636	0.841	0.727	0.953	0.71	0.531	0.46	0.832	0.956	0.761	0.445	0.712	0.64	0.771	0.887	0.998	0.854	0.649	0.547	0.624	0.423	0.698	0.84	0.72	0.777	0.761	0.462	0.815	0.575	0.622	0.586	0.755	0.7	0.503	0.574	0.439	0.821	0.62	0.779	0.453	0.608
S170	0.8	0.584	0.516	0.524	0.494	0.56	0.647	0.57	0.537	0.877	0.489	0.936	0.7	0.423	0.615	0.552	0.836	0.659	0.742	0.774	0.511	0.556	0.685	0.87	0.737	0.428	0.406	0.426	0.632	0.607	0.891	0.467	0.599	0.624	0.547	0.847	0.445	0.666	0.393	0.471	0.583	0.651	0.422	0.591	0.512	0.529	0.713	0.567	0.786
S171	0.836	0.754	0.887	0.9	0.874	0.908	0.607	0.832	0.873	0.945	0.906	0.962	0.855	0.764	0.6	0.92	0.945	0.886	0.367	0.798	0.87	0.791	0.895	0.98	0.895	0.882	0.876	0.788	0.824	0.883	0.856	0.802	0.802	0.909	0.705	0.921	0.812	0.473	0.843	0.841	0.869	0.831	0.821	0.711	0.938	0.764	0.786	0.721	0.656
S172	0.45	0.957	0.971	0.944	0.963	0.967	0.888	0.898	0.948	0.703	0.948	0.316	0.979	0.949	0.831	0.963	0.95	0.935	0.897	0.451	0.968	0.962	0.991	0.915	0.992	0.96	0.959	0.968	0.949	0.954	0.443	0.956	0.962	0.923	0.896	0.456	0.953	0.89	0.957	0.965	0.946	0.819	0.957	0.885	0.913	0.952	0.965	0.824	0.881
S173	0.286	0.854	0.855	0.849	0.829	0.837	0.836	0.745	0.811	0.735	0.825	0.35	0.939	0.842	0.844	0.817	0.962	0.848	0.867	0.438	0.8	0.87	0.95	0.988	0.958	0.819	0.816	0.848	0.837	0.837	0.31	0.817	0.806	0.808	0.815	0.196	0.844	0.853	0.837	0.861	0.833	0.885	0.831	0.788	0.861	0.81	0.92	0.782	0.863
S174	0.249	0.772	0.839	0.826	0.789	0.785	0.744	0.694	0.765	0.717	0.824	0.379	0.899	0.757	0.78	0.849	0.972	0.825	0.866	0.378	0.764	0.837	0.887	0.999	0.906	0.806	0.727	0.818	0.808	0.796	0.26	0.778	0.818	0.838	0.803	0.18	0.779	0.862	0.777	0.818	0.845	0.809	0.798	0.785	0.865	0.755	0.896	0.727	0.815
S175	0.837	0.606	0.54	0.402	0.446	0.596	0.647	0.698	0.723	0.698	0.327	0.974	0.694	0.643	0.626	0.586	0.929	0.664	0.754	0.849	0.586	0.602	0.86	0.979	0.904	0.418	0.598	0.505	0.571	0.328	0.916	0.54	0.573	0.436	0.447	0.873	0.357	0.62	0.502	0.469	0.383	0.575	0.338	0.576	0.563	0.554	0.823	0.673	0.812
S176	0.848	0.591	0.486	0.417	0.604	0.652	0.699	0.643	0.674	0.826	0.423	0.931	0.765	0.61	0.726	0.418	0.85	0.729	0.802	0.802	0.558	0.606	0.698	0.917	0.777	0.492	0.63	0.568	0.748	0.549	0.89	0.452	0.546	0.609	0.606	0.889	0.509	0.629	0.573	0.454	0.443	0.758	0.508	0.646	0.436	0.576	0.811	0.649	0.819
S177	0.298	0.917	0.922	0.901	0.913	0.916	0.913	0.848	0.892	0.728	0.898	0.348	0.96	0.916	0.883	0.893	0.961	0.865	0.918	0.459	0.906	0.92	0.982	0.975	0.984	0.906	0.913	0.92	0.892	0.909	0.307	0.901	0.901	0.882	0.909	0.153	0.911	0.892	0.914	0.9	0.903	0.904	0.904	0.887	0.889	0.906	0.948	0.854	0.893
S178	0.859	0.63	0.451	0.59	0.589	0.61	0.723	0.623	0.536	0.875	0.607	0.963	0.893	0.507	0.738	0.524	0.969	0.798	0.855	0.789	0.596	0.575	0.895	0.996	0.913	0.559	0.494	0.388	0.634	0.631	0.899	0.542	0.644	0.65	0.65	0.874	0.58	0.647	0.509	0.514	0.488	0.724	0.529	0.71	0.499	0.67	0.884	0.628	0.788
S179	0.274	0.923	0.963	0.959	0.901	0.931	0.878	0.834	0.899	0.743	0.961	0.365	0.886	0.903	0.863	0.978	0.967	0.883	0.9	0.438	0.905	0.886	0.916	0.982	0.923	0.899	0.895	0.905	0.896	0.929	0.25	0.922	0.924	0.954	0.904	0.168	0.897	0.971	0.906	0.89	0.966	0.872	0.872	0.9	0.973	0.902	0.86	0.833	0.942
S180	0.811	0.719	0.921	0.838	0.664	0.886	0.637	0.778	0.777	0.941	0.786	0.935	0.559	0.745	0.507	0.862	0.801	0.676	0.743	0.819	0.684	0.693	0.716	0.884	0.772	0.619	0.785	0.715	0.672	0.834	0.853	0.749	0.802	0.854	0.681	0.896	0.735	0.939	0.693	0.737	0.863	0.698	0.701	0.717	0.921	0.567	0.445	0.753	0.831
S181	0.584	0.855	0.922	0.861	0.839	0.884	0.569	0.738	0.853	0.673	0.818	0.632	0.848	0.815	0.705	0.79	0.95	0.886	0.537	0.512	0.797	0.917	0.959	0.987	0.902	0.839	0.843	0.878	0.734	0.844	0.566	0.813	0.79	0.782	0.662	0.572	0.831	0.639	0.866	0.936	0.858	0.778	0.802	0.652	0.925	0.807	0.855	0.653	0.711
S182	0.733	0.635	0.875	0.8	0.682	0.799	0.488	0.7	0.788	0.912	0.779	0.974	0.761	0.628	0.556	0.878	0.954	0.831	0.579	0.703	0.751	0.716	0.809	0.997	0.824	0.79	0.772	0.737	0.678	0.753	0.751	0.734	0.738	0.808	0.562	0.84	0.721	0.695	0.749	0.798	0.784	0.674	0.67	0.613	0.909	0.689	0.714	0.578	0.647
S183	0.889	0.595	0.44	0.324	0.469	0.546	0.737	0.762	0.638	0.808	0.354	0.964	0.825	0.587	0.705	0.537	0.949	0.773	0.834	0.864	0.669	0.607	0.858	0.987	0.896	0.504	0.58	0.485	0.594	0.364	0.931	0.557	0.586	0.437	0.492	0.894	0.39	0.636	0.544	0.539	0.297	0.644	0.38	0.662	0.502	0.503	0.882	0.714	0.828
S184	0.742	0.5	0.534	0.593	0.478	0.569	0.571	0.515	0.51	0.827	0.549	0.915	0.704	0.387	0.627	0.594	0.965	0.641	0.736	0.763	0.441	0.524	0.818	0.996	0.794	0.432	0.406	0.421	0.52	0.546	0.837	0.47	0.567	0.599	0.518	0.829	0.438	0.584	0.485	0.525	0.517	0.57	0.355	0.582	0.56	0.572	0.793	0.537	0.739
S185	0.889	0.853	0.82	0.633	0.563	0.727	0.757	0.73	0.568	0.886	0.606	0.935	0.741	0.657	0.717	0.826	0.833	0.851	0.801	0.822	0.761	0.854	0.74	0.869	0.757	0.689	0.627	0.611	0.47	0.631	0.905	0.76	0.832	0.691	0.605	0.891	0.6	0.928	0.583	0.85	0.657	0.528	0.623	0.778	0.816	0.476	0.75	0.719	0.866
S186	0.893	0.838	0.779	0.715	0.675	0.719	0.761	0.758	0.595	0.851	0.701	0.94	0.746	0.658	0.753	0.817	0.817	0.819	0.796	0.829	0.753	0.846	0.607	0.836	0.713	0.677	0.629	0.662	0.661	0.755	0.915	0.767	0.828	0.842	0.743	0.877	0.694	0.924	0.623	0.854	0.769	0.675	0.715	0.769	0.767	0.608	0.752	0.769	0.88
S187	0.286	0.898	0.916	0.927	0.896	0.891	0.821	0.808	0.879	0.741	0.905	0.375	0.919	0.868	0.833	0.911	0.967	0.904	0.835	0.393	0.88	0.923	0.929	0.994	0.948	0.887	0.851	0.909	0.869	0.885	0.27	0.883	0.885	0.912	0.834	0.138	0.884	0.884	0.87	0.898	0.918	0.881	0.893	0.818	0.953	0.855	0.927	0.779	0.839
S188	0.918	0.624	0.561	0.531	0.742	0.715	0.821	0.781	0.791	0.905	0.544	0.927	0.881	0.72	0.787	0.434	0.902	0.737	0.808	0.893	0.624	0.63	0.848	0.94	0.884	0.586	0.709	0.621	0.831	0.655	0.942	0.532	0.561	0.461	0.71	0.909	0.622	0.62	0.659	0.513	0.49	0.856	0.619	0.672	0.496	0.678	0.784	0.732	0.827
S189	0.8	0.633	0.789	0.727	0.607	0.728	0.524	0.534	0.575	0.83	0.661	0.926	0.703	0.558	0.559	0.749	0.927	0.69	0.731	0.664	0.593	0.705	0.781	0.96	0.789	0.656	0.569	0.68	0.539	0.664	0.78	0.599	0.665	0.679	0.59	0.848	0.546	0.81	0.586	0.684	0.731	0.581	0.499	0.603	0.789	0.561	0.698	0.523	0.757
S190	0.85	0.661	0.86	0.804	0.835	0.818	0.694	0.713	0.662	0.826	0.847	0.92	0.711	0.682	0.713	0.834	0.815	0.73	0.82	0.773	0.729	0.747	0.64	0.837	0.58	0.719	0.671	0.716	0.737	0.807	0.829	0.685	0.853	0.914	0.698	0.905	0.644	0.93	0.732	0.709	0.868	0.747	0.665	0.735	0.86	0.566	0.619	0.746	0.796
S191	0.789	0.557	0.523	0.513	0.598	0.684	0.699	0.696	0.713	0.913	0.504	0.943	0.76	0.571	0.589	0.48	0.935	0.726	0.774	0.806	0.625	0.495	0.845	0.962	0.879	0.495	0.647	0.512	0.67	0.549	0.892	0.47	0.534	0.566	0.569	0.855	0.539	0.631	0.585	0.317	0.317	0.717	0.476	0.685	0.454	0.564	0.711	0.695	0.765
S192	0.829	0.828	0.876	0.794	0.689	0.807	0.435	0.671	0.618	0.875	0.761	0.89	0.728	0.674	0.471	0.811	0.909	0.745	0.416	0.703	0.626	0.774	0.817	0.93	0.863	0.693	0.587	0.795	0.571	0.759	0.873	0.729	0.723	0.683	0.47	0.854	0.643	0.632	0.657	0.728	0.824	0.539	0.666	0.473	0.848	0.643	0.727	0.486	0.521
S193	0.909	0.845	0.86	0.732	0.714	0.8	0.722	0.816	0.794	0.815	0.805	0.941	0.665	0.831	0.687	0.84	0.63	0.743	0.826	0.886	0.723	0.893	0.502	0.627	0.477	0.628	0.74	0.8	0.787	0.823	0.922	0.816	0.9	0.934	0.812	0.934	0.709	0.96	0.71	0.821	0.877	0.768	0.793	0.718	0.793	0.729	0.735	0.809	0.92
S194	0.783	0.522	0.673	0.71	0.578	0.619	0.531	0.575	0.627	0.836	0.657	0.949	0.695	0.438	0.624	0.754	0.944	0.684	0.747	0.726	0.575	0.631	0.837	0.983	0.688	0.578	0.56	0.581	0.63	0.628	0.824	0.477	0.656	0.719	0.561	0.813	0.515	0.762	0.595	0.67	0.659	0.65	0.451	0.633	0.718	0.612	0.795	0.581	0.778
S195	0.83	0.568	0.56	0.614	0.611	0.557	0.701	0.636	0.549	0.848	0.579	0.958	0.816	0.596	0.717	0.596	0.953	0.709	0.802	0.794	0.534	0.626	0.736	0.975	0.854	0.506	0.472	0.569	0.708	0.531	0.893	0.545	0.62	0.629	0.544	0.837	0.51	0.68	0.596	0.576	0.598	0.71	0.503	0.596	0.616	0.634	0.844	0.637	0.731
S196	0.864	0.775	0.795	0.793	0.715	0.72	0.741	0.636	0.528	0.839	0.748	0.924	0.749	0.695	0.765	0.806	0.788	0.787	0.822	0.783	0.673	0.853	0.573	0.82	0.674	0.689	0.563	0.788	0.616	0.793	0.888	0.724	0.818	0.88	0.764	0.855	0.756	0.906	0.642	0.819	0.848	0.624	0.74	0.775	0.811	0.65	0.7	0.675	0.861
S197	0.834	0.588	0.794	0.798	0.706	0.772	0.657	0.717	0.652	0.854	0.715	0.968	0.871	0.573	0.626	0.749	0.926	0.669	0.854	0.818	0.737	0.695	0.833	0.997	0.842	0.741	0.709	0.648	0.733	0.752	0.852	0.614	0.781	0.798	0.58	0.883	0.602	0.801	0.746	0.637	0.728	0.762	0.602	0.699	0.818	0.646	0.823	0.758	0.576
[truncated: 332 more columns]

## Sheet: Table S5
Table S5. Correlations between the gut microbiota and clinical parameters
species	clinical	r	q
Bacteroides_finegoldii	Alanine aminotransferase	-0.0575047	0.674342
Bacteroides_plebeius	Alanine aminotransferase	-0.0298386	0.851082
Bacteroides_stercoris	Alanine aminotransferase	-0.01391	0.941949
Bacteroides_clarus	Alanine aminotransferase	0.0404592	0.768721
Bacteroides_ovatus	Alanine aminotransferase	-0.0888788	0.445727
Bacteroides_thetaiotaomicron	Alanine aminotransferase	-0.089064	0.445727
Bacteroides_uniformis	Alanine aminotransferase	-0.0935112	0.411736
Bacteroides_vulgatus	Alanine aminotransferase	0.0505461	0.720124
Bifidobacterium_longum	Alanine aminotransferase	-0.196965	0.0285536
Ruminococcus_gnavus	Alanine aminotransferase	0.150329	0.0848878
Ruminococcus_torques	Alanine aminotransferase	0.036584	0.797064
Blautia_wexlerae	Alanine aminotransferase	-0.0884795	0.445727
Clostridium_sp_CAG_299	Alanine aminotransferase	0.0259035	0.868042
Clostridium_sp_CAG_58	Alanine aminotransferase	-0.0895005	0.445727
Clostridium_bolteae_CAG_59	Alanine aminotransferase	-0.0527546	0.701926
Collinsella_aerofaciens	Alanine aminotransferase	-0.0881136	0.445727
Dorea_longicatena	Alanine aminotransferase	0.00524538	0.979514
Erysipelatoclostridium_ramosum	Alanine aminotransferase	0.0128506	0.945017
Escherichia_coli	Alanine aminotransferase	0.0142034	0.941949
Eubacterium_sp_CAG_180	Alanine aminotransferase	-0.0256966	0.868042
Faecalibacterium_prausnitzii	Alanine aminotransferase	-0.133794	0.141224
Faecalicatena_orotica	Alanine aminotransferase	-0.0939002	0.411736
Flavonifractor_plautii	Alanine aminotransferase	-0.0758214	0.533211
Fusobacterium_ulcerans	Alanine aminotransferase	0.0411262	0.76748
Klebsiella_quasipneumoniae	Alanine aminotransferase	-0.0627578	0.633382
Clostridium_symbiosum	Alanine aminotransferase	-0.130766	0.149373
Clostridium_bolteae	Alanine aminotransferase	-0.0318024	0.833447
Lachnospira_pectinoschiza	Alanine aminotransferase	0.0880258	0.445727
Massiliomicrobiota_timonensis	Alanine aminotransferase	-0.0706901	0.594116
Megamonas_rupellensis	Alanine aminotransferase	0.0140197	0.941949
Parabacteroides_distasonis	Alanine aminotransferase	-0.0309012	0.840832
Phascolarctobacterium_faecium	Alanine aminotransferase	-0.0138316	0.941949
Phascolarctobacterium_succinatutens	Alanine aminotransferase	-0.00866334	0.964261
Prevotella_copri	Alanine aminotransferase	-0.0813074	0.492479
Roseburia_faecis	Alanine aminotransferase	-0.0950625	0.397602
Ruminococcus_bicirculans	Alanine aminotransferase	-0.0848598	0.458019
Streptococcus_salivarius	Alanine aminotransferase	-0.155893	0.072789
Bacteroides_finegoldii	Aspartate Aminotransferase	-0.0560367	0.679804
Bacteroides_plebeius	Aspartate Aminotransferase	-0.0525815	0.701926
Bacteroides_stercoris	Aspartate Aminotransferase	-0.0389277	0.774172
Bacteroides_clarus	Aspartate Aminotransferase	0.00211491	0.988695
Bacteroides_ovatus	Aspartate Aminotransferase	-0.0046568	0.979514
Bacteroides_thetaiotaomicron	Aspartate Aminotransferase	-0.065867	0.623907
Bacteroides_uniformis	Aspartate Aminotransferase	-0.0629023	0.633382
Bacteroides_vulgatus	Aspartate Aminotransferase	0.0959359	0.387456
Bifidobacterium_longum	Aspartate Aminotransferase	-0.164199	0.0621464
Ruminococcus_gnavus	Aspartate Aminotransferase	0.122817	0.185671
Ruminococcus_torques	Aspartate Aminotransferase	0.0518184	0.706584
Blautia_wexlerae	Aspartate Aminotransferase	-0.0512738	0.708704
Clostridium_sp_CAG_299	Aspartate Aminotransferase	-0.00981002	0.957453
Clostridium_sp_CAG_58	Aspartate Aminotransferase	-0.0841401	0.46292
Clostridium_bolteae_CAG_59	Aspartate Aminotransferase	-0.102247	0.340927
Collinsella_aerofaciens	Aspartate Aminotransferase	-0.112769	0.262086
Dorea_longicatena	Aspartate Aminotransferase	-0.0848073	0.458019
Erysipelatoclostridium_ramosum	Aspartate Aminotransferase	0.0455744	0.763859
Escherichia_coli	Aspartate Aminotransferase	-0.0093092	0.960388
Eubacterium_sp_CAG_180	Aspartate Aminotransferase	-0.072926	0.564496
Faecalibacterium_prausnitzii	Aspartate Aminotransferase	-0.0782525	0.506237
Faecalicatena_orotica	Aspartate Aminotransferase	-0.000612527	0.996434
Flavonifractor_plautii	Aspartate Aminotransferase	-0.0528989	0.701926
Fusobacterium_ulcerans	Aspartate Aminotransferase	-0.0026773	0.985548
Klebsiella_quasipneumoniae	Aspartate Aminotransferase	-0.102451	0.340927
Clostridium_symbiosum	Aspartate Aminotransferase	-0.0744966	0.544865
Clostridium_bolteae	Aspartate Aminotransferase	-0.0156558	0.939186
Lachnospira_pectinoschiza	Aspartate Aminotransferase	0.0578213	0.674342
Massiliomicrobiota_timonensis	Aspartate Aminotransferase	-0.0425083	0.76748
Megamonas_rupellensis	Aspartate Aminotransferase	-0.00738682	0.97111
Parabacteroides_distasonis	Aspartate Aminotransferase	-0.0696233	0.60296
Phascolarctobacterium_faecium	Aspartate Aminotransferase	-0.0182982	0.917351
Phascolarctobacterium_succinatutens	Aspartate Aminotransferase	0.024178	0.879736
Prevotella_copri	Aspartate Aminotransferase	-0.027547	0.866809
Roseburia_faecis	Aspartate Aminotransferase	-0.0488879	0.737555
Ruminococcus_bicirculans	Aspartate Aminotransferase	-0.122619	0.185671
Streptococcus_salivarius	Aspartate Aminotransferase	-0.132034	0.142395
Bacteroides_finegoldii	AST/ALT	0.0305481	0.840832
Bacteroides_plebeius	AST/ALT	-0.0143385	0.941949
Bacteroides_stercoris	AST/ALT	-0.0406166	0.768111
Bacteroides_clarus	AST/ALT	-0.0347073	0.809118
Bacteroides_ovatus	AST/ALT	0.116819	0.229106
Bacteroides_thetaiotaomicron	AST/ALT	0.0849789	0.458019
Bacteroides_uniformis	AST/ALT	0.0796983	0.50441
Bacteroides_vulgatus	AST/ALT	0.0178918	0.920179
Bifidobacterium_longum	AST/ALT	0.162283	0.0621464
Ruminococcus_gnavus	AST/ALT	-0.124155	0.181787
Ruminococcus_torques	AST/ALT	0.0105434	0.957453
Blautia_wexlerae	AST/ALT	0.0874613	0.445823
Clostridium_sp_CAG_299	AST/ALT	-0.0539529	0.692573
Clostridium_sp_CAG_58	AST/ALT	0.022866	0.887257
Clostridium_bolteae_CAG_59	AST/ALT	-0.00477079	0.979514
Collinsella_aerofaciens	AST/ALT	0.0099688	0.957453
Dorea_longicatena	AST/ALT	-0.0884667	0.445727
Erysipelatoclostridium_ramosum	AST/ALT	-0.00499192	0.979514
Escherichia_coli	AST/ALT	-0.0361553	0.799201
Eubacterium_sp_CAG_180	AST/ALT	-0.0241841	0.879736
Faecalibacterium_prausnitzii	AST/ALT	0.16341	0.0621464
Faecalicatena_orotica	AST/ALT	0.149254	0.0864479
Flavonifractor_plautii	AST/ALT	0.0284309	0.857349
Fusobacterium_ulcerans	AST/ALT	-0.045156	0.764103
Klebsiella_quasipneumoniae	AST/ALT	0.00265195	0.985548
Clostridium_symbiosum	AST/ALT	0.11922	0.210257
Clostridium_bolteae	AST/ALT	0.0306447	0.840832
Lachnospira_pectinoschiza	AST/ALT	-0.0650141	0.626969
Massiliomicrobiota_timonensis	AST/ALT	0.0131935	0.941949
Megamonas_rupellensis	AST/ALT	-0.0362661	0.799201
Parabacteroides_distasonis	AST/ALT	-0.0127015	0.945501
Phascolarctobacterium_faecium	AST/ALT	-0.00770625	0.967976
Phascolarctobacterium_succinatutens	AST/ALT	0.0444561	0.764103
Prevotella_copri	AST/ALT	0.0763609	0.526979
Roseburia_faecis	AST/ALT	0.118604	0.213582
Ruminococcus_bicirculans	AST/ALT	0.0396727	0.7697
Streptococcus_salivarius	AST/ALT	0.112465	0.262453
Bacteroides_finegoldii	Direct bilirubin	0.00619146	0.979514
Bacteroides_plebeius	Direct bilirubin	-0.0492808	0.734152
Bacteroides_stercoris	Direct bilirubin	-0.0644915	0.626969
Bacteroides_clarus	Direct bilirubin	-0.0447165	0.764103
Bacteroides_ovatus	Direct bilirubin	-0.000825373	0.996434
Bacteroides_thetaiotaomicron	Direct bilirubin	0.00989846	0.957453
Bacteroides_uniformis	Direct bilirubin	-0.0366822	0.797064
Bacteroides_vulgatus	Direct bilirubin	0.0134655	0.941949
Bifidobacterium_longum	Direct bilirubin	0.0465669	0.755527
Ruminococcus_gnavus	Direct bilirubin	-0.065697	0.623907
Ruminococcus_torques	Direct bilirubin	0.0913524	0.436472
Blautia_wexlerae	Direct bilirubin	-0.010275	0.957453
Clostridium_sp_CAG_299	Direct bilirubin	-0.0594154	0.651949
Clostridium_sp_CAG_58	Direct bilirubin	-0.00509491	0.979514
Clostridium_bolteae_CAG_59	Direct bilirubin	-0.00693275	0.974313
Collinsella_aerofaciens	Direct bilirubin	-0.022012	0.895412
Dorea_longicatena	Direct bilirubin	0.047496	0.749025
Erysipelatoclostridium_ramosum	Direct bilirubin	-0.0394898	0.77061
Escherichia_coli	Direct bilirubin	-0.0421606	0.76748
Eubacterium_sp_CAG_180	Direct bilirubin	-0.0016761	0.989775
Faecalibacterium_prausnitzii	Direct bilirubin	0.051831	0.706584
Faecalicatena_orotica	Direct bilirubin	-0.013869	0.941949
Flavonifractor_plautii	Direct bilirubin	-0.0672795	0.615194
Fusobacterium_ulcerans	Direct bilirubin	-0.0411803	0.76748
Klebsiella_quasipneumoniae	Direct bilirubin	0.013706	0.941949
Clostridium_symbiosum	Direct bilirubin	0.00354557	0.981477
Clostridium_bolteae	Direct bilirubin	-0.0695608	0.60296
Lachnospira_pectinoschiza	Direct bilirubin	0.0431834	0.76748
Massiliomicrobiota_timonensis	Direct bilirubin	-0.0137054	0.941949
Megamonas_rupellensis	Direct bilirubin	-0.0132048	0.941949
Parabacteroides_distasonis	Direct bilirubin	0.0145087	0.941949
Phascolarctobacterium_faecium	Direct bilirubin	0.0145292	0.941949
Phascolarctobacterium_succinatutens	Direct bilirubin	-0.0494679	0.733154
Prevotella_copri	Direct bilirubin	-0.0615772	0.633633
Roseburia_faecis	Direct bilirubin	0.00881414	0.963776
Ruminococcus_bicirculans	Direct bilirubin	0.0464343	0.755527
Streptococcus_salivarius	Direct bilirubin	-0.0795925	0.50441
Bacteroides_finegoldii	Total bilirubin	-0.0702894	0.595348
Bacteroides_plebeius	Total bilirubin	-0.107273	0.313247
Bacteroides_stercoris	Total bilirubin	-0.0690711	0.609239
Bacteroides_clarus	Total bilirubin	-0.00351546	0.981477
Bacteroides_ovatus	Total bilirubin	0.0101465	0.957453
Bacteroides_thetaiotaomicron	Total bilirubin	-0.00380307	0.981477
Bacteroides_uniformis	Total bilirubin	-0.0677089	0.615194
Bacteroides_vulgatus	Total bilirubin	-0.00704567	0.974313
Bifidobacterium_longum	Total bilirubin	-0.0421361	0.76748
Ruminococcus_gnavus	Total bilirubin	-0.0825461	0.4838
Ruminococcus_torques	Total bilirubin	0.0294671	0.851082
Blautia_wexlerae	Total bilirubin	0.00428339	0.979835
Clostridium_sp_CAG_299	Total bilirubin	-0.0671706	0.615194
Clostridium_sp_CAG_58	Total bilirubin	-0.086944	0.445823
Clostridium_bolteae_CAG_59	Total bilirubin	-0.0996956	0.361839
Collinsella_aerofaciens	Total bilirubin	-0.0684451	0.614967
Dorea_longicatena	Total bilirubin	-0.0454167	0.763859
Erysipelatoclostridium_ramosum	Total bilirubin	-0.0552672	0.686472
Escherichia_coli	Total bilirubin	-0.0878741	0.445727
Eubacterium_sp_CAG_180	Total bilirubin	0.0399002	0.7697
Faecalibacterium_prausnitzii	Total bilirubin	-0.0495311	0.733154
Faecalicatena_orotica	Total bilirubin	-0.0669163	0.616107
Flavonifractor_plautii	Total bilirubin	-0.132779	0.142395
Fusobacterium_ulcerans	Total bilirubin	-0.0311954	0.839601
Klebsiella_quasipneumoniae	Total bilirubin	-0.0559589	0.679804
Clostridium_symbiosum	Total bilirubin	-0.0786686	0.506237
Clostridium_bolteae	Total bilirubin	-0.115379	0.241701
Lachnospira_pectinoschiza	Total bilirubin	0.0616294	0.633633
Massiliomicrobiota_timonensis	Total bilirubin	-0.0658771	0.623907
Megamonas_rupellensis	Total bilirubin	-0.0201202	0.904824
Parabacteroides_distasonis	Total bilirubin	-0.00954813	0.95973
Phascolarctobacterium_faecium	Total bilirubin	-0.0569531	0.674342
Phascolarctobacterium_succinatutens	Total bilirubin	0.00124274	0.994381
Prevotella_copri	Total bilirubin	-0.103695	0.332106
Roseburia_faecis	Total bilirubin	0.0107801	0.957309
Ruminococcus_bicirculans	Total bilirubin	0.0382476	0.779924
Streptococcus_salivarius	Total bilirubin	-0.150219	0.0848878
Bacteroides_finegoldii	Glucose	-0.00109838	0.994702
Bacteroides_plebeius	Glucose	0.017796	0.920179
Bacteroides_stercoris	Glucose	0.0502756	0.722732
Bacteroides_clarus	Glucose	0.056639	0.674897
Bacteroides_ovatus	Glucose	0.0203468	0.904824
Bacteroides_thetaiotaomicron	Glucose	0.0198207	0.907947
Bacteroides_uniformis	Glucose	-0.0344008	0.810701
Bacteroides_vulgatus	Glucose	0.0267585	0.868042
Bifidobacterium_longum	Glucose	-0.150201	0.0848878
Ruminococcus_gnavus	Glucose	0.0183892	0.917351
Ruminococcus_torques	Glucose	-0.079649	0.50441
Blautia_wexlerae	Glucose	-0.0615453	0.633633
Clostridium_sp_CAG_299	Glucose	-0.0062443	0.979514
Clostridium_sp_CAG_58	Glucose	0.0182	0.917351
Clostridium_bolteae_CAG_59	Glucose	0.0964115	0.384406
Collinsella_aerofaciens	Glucose	-0.0111818	0.954683
Dorea_longicatena	Glucose	-0.0408748	0.76748
Erysipelatoclostridium_ramosum	Glucose	0.0287702	0.853382
Escherichia_coli	Glucose	-0.0540969	0.692573
Eubacterium_sp_CAG_180	Glucose	0.00785038	0.967604
Faecalibacterium_prausnitzii	Glucose	-0.140118	0.116928
Faecalicatena_orotica	Glucose	0.0613507	0.634535
Flavonifractor_plautii	Glucose	0.0929451	0.417351
Fusobacterium_ulcerans	Glucose	-0.00682033	0.974313
Klebsiella_quasipneumoniae	Glucose	-0.130287	0.150539
Clostridium_symbiosum	Glucose	-0.0483693	0.741364
Clostridium_bolteae	Glucose	0.10209	0.340927
Lachnospira_pectinoschiza	Glucose	0.0755881	0.534324
Massiliomicrobiota_timonensis	Glucose	-0.0113039	0.954683
Megamonas_rupellensis	Glucose	-0.0163925	0.934293
Parabacteroides_distasonis	Glucose	0.0432373	0.76748
Phascolarctobacterium_faecium	Glucose	-0.0475183	0.749025
Phascolarctobacterium_succinatutens	Glucose	0.0487331	0.737555
Prevotella_copri	Glucose	-0.10555	0.313501
Roseburia_faecis	Glucose	-0.0342558	0.810701
Ruminococcus_bicirculans	Glucose	-0.0261376	0.868042
Streptococcus_salivarius	Glucose	-0.0595582	0.651949
Bacteroides_finegoldii	Hemoglobin	-0.0625012	0.633382
Bacteroides_plebeius	Hemoglobin	0.0821086	0.48494
Bacteroides_stercoris	Hemoglobin	0.0171145	0.929463
Bacteroides_clarus	Hemoglobin	0.0261117	0.868042
Bacteroides_ovatus	Hemoglobin	-0.056252	0.679623
Bacteroides_thetaiotaomicron	Hemoglobin	-0.155923	0.072789
Bacteroides_uniformis	Hemoglobin	-0.196497	0.0285536
Bacteroides_vulgatus	Hemoglobin	0.011461	0.954683
Bifidobacterium_longum	Hemoglobin	-0.0544136	0.692573
Ruminococcus_gnavus	Hemoglobin	0.0265295	0.868042
Ruminococcus_torques	Hemoglobin	0.137469	0.126612
Blautia_wexlerae	Hemoglobin	-0.124003	0.181787
Clostridium_sp_CAG_299	Hemoglobin	0.0333588	0.823242
Clostridium_sp_CAG_58	Hemoglobin	0.0545967	0.692515
Clostridium_bolteae_CAG_59	Hemoglobin	-0.0358314	0.799649
Collinsella_aerofaciens	Hemoglobin	-0.044112	0.764717
Dorea_longicatena	Hemoglobin	0.0522211	0.706229
Erysipelatoclostridium_ramosum	Hemoglobin	-0.0665886	0.618973
Escherichia_coli	Hemoglobin	0.0376361	0.7869
Eubacterium_sp_CAG_180	Hemoglobin	0.0620022	0.633382
Faecalibacterium_prausnitzii	Hemoglobin	-0.122439	0.185671
Faecalicatena_orotica	Hemoglobin	-0.0326903	0.830556
Flavonifractor_plautii	Hemoglobin	-0.107291	0.313247
Fusobacterium_ulcerans	Hemoglobin	-0.013509	0.941949
Klebsiella_quasipneumoniae	Hemoglobin	-0.0156017	0.939186
Clostridium_symbiosum	Hemoglobin	-0.143816	0.102129
Clostridium_bolteae	Hemoglobin	-0.0985185	0.369331
Lachnospira_pectinoschiza	Hemoglobin	0.124753	0.180489
Massiliomicrobiota_timonensis	Hemoglobin	-0.138294	0.12366
Megamonas_rupellensis	Hemoglobin	0.0471691	0.749025
Parabacteroides_distasonis	Hemoglobin	0.00196851	0.989058
Phascolarctobacterium_faecium	Hemoglobin	-0.0621183	0.633382
Phascolarctobacterium_succinatutens	Hemoglobin	0.0321913	0.833447
Prevotella_copri	Hemoglobin	0.0383732	0.779874
Roseburia_faecis	Hemoglobin	-0.013156	0.941949
Ruminococcus_bicirculans	Hemoglobin	-0.0620593	0.633382
Streptococcus_salivarius	Hemoglobin	-0.132329	0.142395
Bacteroides_finegoldii	Total cholesterol	-0.0720677	0.574327
Bacteroides_plebeius	Total cholesterol	-0.0247817	0.877518
Bacteroides_stercoris	Total cholesterol	-0.0773165	0.515694
Bacteroides_clarus	Total cholesterol	0.0216209	0.897407
Bacteroides_ovatus	Total cholesterol	0.0412907	0.76748
Bacteroides_thetaiotaomicron	Total cholesterol	0.113009	0.262086
Bacteroides_uniformis	Total cholesterol	-0.000321883	0.996773
Bacteroides_vulgatus	Total cholesterol	-0.0159195	0.937882
Bifidobacterium_longum	Total cholesterol	-0.0647467	0.626969
Ruminococcus_gnavus	Total cholesterol	0.152274	0.0844864
Ruminococcus_torques	Total cholesterol	-0.0638715	0.629404
Blautia_wexlerae	Total cholesterol	0.0538024	0.692573
Clostridium_sp_CAG_299	Total cholesterol	0.0292594	0.851082
Clostridium_sp_CAG_58	Total cholesterol	-0.0783695	0.506237
Clostridium_bolteae_CAG_59	Total cholesterol	0.00489866	0.979514
Collinsella_aerofaciens	Total cholesterol	-0.136797	0.128617
Dorea_longicatena	Total cholesterol	-0.0356614	0.800533
Erysipelatoclostridium_ramosum	Total cholesterol	0.161962	0.0621464
Escherichia_coli	Total cholesterol	0.0318541	0.833447
Eubacterium_sp_CAG_180	Total cholesterol	-0.125386	0.177634
Faecalibacterium_prausnitzii	Total cholesterol	-0.18895	0.0285536
Faecalicatena_orotica	Total cholesterol	-0.0259892	0.868042
Flavonifractor_plautii	Total cholesterol	0.140566	0.116618
Fusobacterium_ulcerans	Total cholesterol	0.0444768	0.764103
Klebsiella_quasipneumoniae	Total cholesterol	-0.103409	0.332637
Clostridium_symbiosum	Total cholesterol	0.0272596	0.868042
Clostridium_bolteae	Total cholesterol	0.167449	0.0619331
Lachnospira_pectinoschiza	Total cholesterol	0.00504671	0.979514
Massiliomicrobiota_timonensis	Total cholesterol	0.0237246	0.883529
Megamonas_rupellensis	Total cholesterol	-0.0288525	0.853382
Parabacteroides_distasonis	Total cholesterol	0.0640895	0.628169
Phascolarctobacterium_faecium	Total cholesterol	-0.0375017	0.7869
Phascolarctobacterium_succinatutens	Total cholesterol	0.0109356	0.956736
Prevotella_copri	Total cholesterol	-0.0203976	0.904824
Roseburia_faecis	Total cholesterol	-0.0789716	0.506237
Ruminococcus_bicirculans	Total cholesterol	-0.18023	0.0323046
Streptococcus_salivarius	Total cholesterol	-0.0185948	0.917351
Bacteroides_finegoldii	Triglycerides	-0.0307896	0.840832
Bacteroides_plebeius	Triglycerides	0.0454088	0.763859
Bacteroides_stercoris	Triglycerides	0.0413774	0.76748
Bacteroides_clarus	Triglycerides	0.0220067	0.895412
Bacteroides_ovatus	Triglycerides	0.0311474	0.839601
Bacteroides_thetaiotaomicron	Triglycerides	-0.0267127	0.868042
Bacteroides_uniformis	Triglycerides	-0.0779964	0.508791
Bacteroides_vulgatus	Triglycerides	0.0793925	0.505931
Bifidobacterium_longum	Triglycerides	-0.185521	0.0285536
Ruminococcus_gnavus	Triglycerides	0.193084	0.0285536
Ruminococcus_torques	Triglycerides	-0.106601	0.313247
Blautia_wexlerae	Triglycerides	-0.0399272	0.7697
Clostridium_sp_CAG_299	Triglycerides	0.108004	0.313247
Clostridium_sp_CAG_58	Triglycerides	-0.043517	0.76748
Clostridium_bolteae_CAG_59	Triglycerides	0.00799174	0.967604
Collinsella_aerofaciens	Triglycerides	-0.0822889	0.48494
Dorea_longicatena	Triglycerides	-0.0430165	0.76748
Erysipelatoclostridium_ramosum	Triglycerides	0.147762	0.0912929
Escherichia_coli	Triglycerides	0.0675298	0.615194
Eubacterium_sp_CAG_180	Triglycerides	-0.000221105	0.996773
Faecalibacterium_prausnitzii	Triglycerides	-0.222483	0.01973
Faecalicatena_orotica	Triglycerides	-0.0972146	0.380425
Flavonifractor_plautii	Triglycerides	0.0606066	0.642034
Fusobacterium_ulcerans	Triglycerides	0.169119	0.0599428
Klebsiella_quasipneumoniae	Triglycerides	0.012306	0.94904
Clostridium_symbiosum	Triglycerides	-0.0517329	0.706584
Clostridium_bolteae	Triglycerides	0.139092	0.122308
Lachnospira_pectinoschiza	Triglycerides	0.0320398	0.833447
Massiliomicrobiota_timonensis	Triglycerides	-0.0410314	0.76748
Megamonas_rupellensis	Triglycerides	0.100119	0.361285
Parabacteroides_distasonis	Triglycerides	0.0889801	0.445727
Phascolarctobacterium_faecium	Triglycerides	0.0245095	0.879736
Phascolarctobacterium_succinatutens	Triglycerides	0.0280454	0.862917
Prevotella_copri	Triglycerides	0.0122651	0.94904
Roseburia_faecis	Triglycerides	-0.0816789	0.491325
Ruminococcus_bicirculans	Triglycerides	-0.162222	0.0621464
Streptococcus_salivarius	Triglycerides	-0.0783159	0.506237
Bacteroides_finegoldii	LDL	-0.0318012	0.833447
Bacteroides_plebeius	LDL	0.0429494	0.76748
Bacteroides_stercoris	LDL	-0.0552969	0.686472
Bacteroides_clarus	LDL	-0.0213551	0.897875
Bacteroides_ovatus	LDL	-0.00301372	0.985548
Bacteroides_thetaiotaomicron	LDL	0.106676	0.313247
Bacteroides_uniformis	LDL	0.00170055	0.989775
Bacteroides_vulgatus	LDL	-0.0515003	0.70696
Bifidobacterium_longum	LDL	-0.0736942	0.553371
Ruminococcus_gnavus	LDL	0.142213	0.109026
Ruminococcus_torques	LDL	-0.0350097	0.808044
Blautia_wexlerae	LDL	0.0443868	0.764103
Clostridium_sp_CAG_299	LDL	0.0170143	0.929463
Clostridium_sp_CAG_58	LDL	-0.0372626	0.789051
Clostridium_bolteae_CAG_59	LDL	-0.00794875	0.967604
Collinsella_aerofaciens	LDL	-0.145516	0.0995978
Dorea_longicatena	LDL	0.0292597	0.851082
Erysipelatoclostridium_ramosum	LDL	0.136198	0.130181
Escherichia_coli	LDL	0.0216607	0.897407
Eubacterium_sp_CAG_180	LDL	-0.104253	0.327804
Faecalibacterium_prausnitzii	LDL	-0.121225	0.193776
Faecalicatena_orotica	LDL	0.041356	0.76748
Flavonifractor_plautii	LDL	0.144687	0.0995978
Fusobacterium_ulcerans	LDL	0.0551902	0.686472
Klebsiella_quasipneumoniae	LDL	-0.10166	0.343624
Clostridium_symbiosum	LDL	0.0225213	0.889995
Clostridium_bolteae	LDL	0.132099	0.142395
Lachnospira_pectinoschiza	LDL	-0.0408891	0.76748
Massiliomicrobiota_timonensis	LDL	0.0572186	0.674342
Megamonas_rupellensis	LDL	-0.0235955	0.883696
Parabacteroides_distasonis	LDL	0.0407753	0.76748
Phascolarctobacterium_faecium	LDL	-0.0442746	0.764103
Phascolarctobacterium_succinatutens	LDL	-0.0201982	0.904824
Prevotella_copri	LDL	0.045708	0.763859
Roseburia_faecis	LDL	-0.0400488	0.7697
Ruminococcus_bicirculans	LDL	-0.19124	0.0285536
Streptococcus_salivarius	LDL	-0.0352252	0.806324
Bacteroides_finegoldii	HDL	-0.0389705	0.774172
Bacteroides_plebeius	HDL	-0.0863006	0.445823
Bacteroides_stercoris	HDL	-0.127667	0.168108
Bacteroides_clarus	HDL	0.0276988	0.866254
Bacteroides_ovatus	HDL	0.0388033	0.774201
Bacteroides_thetaiotaomicron	HDL	0.0594143	0.651949
Bacteroides_uniformis	HDL	0.0187485	0.917351
Bacteroides_vulgatus	HDL	-0.0603606	0.642223
Bifidobacterium_longum	HDL	0.185176	0.0285536
Ruminococcus_gnavus	HDL	-0.0228158	0.887257
Ruminococcus_torques	HDL	0.0635041	0.633382
Blautia_wexlerae	HDL	0.0375414	0.7869
Clostridium_sp_CAG_299	HDL	0.0763391	0.526979
Clostridium_sp_CAG_58	HDL	0.00256941	0.985548
Clostridium_bolteae_CAG_59	HDL	0.0632507	0.633382
Collinsella_aerofaciens	HDL	0.0119254	0.952349
Dorea_longicatena	HDL	0.0390495	0.774172
Erysipelatoclostridium_ramosum	HDL	-0.0103233	0.957453
Escherichia_coli	HDL	0.0296006	0.851082
Eubacterium_sp_CAG_180	HDL	-0.0537675	0.692573
Faecalibacterium_prausnitzii	HDL	0.0537567	0.692573
Faecalicatena_orotica	HDL	-0.00926679	0.960388
Flavonifractor_plautii	HDL	0.0785515	0.506237
Fusobacterium_ulcerans	HDL	-0.160114	0.0626186
Klebsiella_quasipneumoniae	HDL	0.0396624	0.7697
Clostridium_symbiosum	HDL	0.0416328	0.76748
Clostridium_bolteae	HDL	-0.00436608	0.979835
Lachnospira_pectinoschiza	HDL	0.0348147	0.809118
Massiliomicrobiota_timonensis	HDL	0.0671244	0.615194
Megamonas_rupellensis	HDL	-0.10572	0.313501
Parabacteroides_distasonis	HDL	-0.00578454	0.979514
Phascolarctobacterium_faecium	HDL	0.00023078	0.996773
Phascolarctobacterium_succinatutens	HDL	-0.0312614	0.839601
Prevotella_copri	HDL	0.00887778	0.963776
Roseburia_faecis	HDL	-0.00276757	0.985548
Ruminococcus_bicirculans	HDL	0.0671938	0.615194
Streptococcus_salivarius	HDL	0.0526395	0.701926
Bacteroides_finegoldii	Uric acid	0.0257567	0.868042
Bacteroides_plebeius	Uric acid	0.0229683	0.887257
Bacteroides_stercoris	Uric acid	0.0427095	0.76748
Bacteroides_clarus	Uric acid	-0.0214772	0.897829
Bacteroides_ovatus	Uric acid	-0.0239309	0.881995
Bacteroides_thetaiotaomicron	Uric acid	-0.0486998	0.737555
Bacteroides_uniformis	Uric acid	-0.106075	0.313247
Bacteroides_vulgatus	Uric acid	0.106187	0.313247
Bifidobacterium_longum	Uric acid	-0.173021	0.0487925
Ruminococcus_gnavus	Uric acid	0.184144	0.0285536
Ruminococcus_torques	Uric acid	-0.0664478	0.618973
Blautia_wexlerae	Uric acid	-0.0458951	0.763455
Clostridium_sp_CAG_299	Uric acid	0.126637	0.171416
Clostridium_sp_CAG_58	Uric acid	-0.0516585	0.706584
Clostridium_bolteae_CAG_59	Uric acid	0.0644369	0.626969
Collinsella_aerofaciens	Uric acid	-0.0201475	0.904824
Dorea_longicatena	Uric acid	-0.0163709	0.934293
Erysipelatoclostridium_ramosum	Uric acid	0.0971707	0.380425
Escherichia_coli	Uric acid	0.0888643	0.445727
Eubacterium_sp_CAG_180	Uric acid	0.0112164	0.954683
Faecalibacterium_prausnitzii	Uric acid	-0.214357	0.01973
Faecalicatena_orotica	Uric acid	-0.0413723	0.76748
Flavonifractor_plautii	Uric acid	0.0115984	0.954683
Fusobacterium_ulcerans	Uric acid	0.148957	0.0864479
Klebsiella_quasipneumoniae	Uric acid	0.00066296	0.996434
Clostridium_symbiosum	Uric acid	-0.0864476	0.445823
Clostridium_bolteae	Uric acid	-0.00457798	0.979514
Lachnospira_pectinoschiza	Uric acid	0.0720645	0.574327
Massiliomicrobiota_timonensis	Uric acid	-0.0647608	0.626969
Megamonas_rupellensis	Uric acid	0.0746332	0.544865
Parabacteroides_distasonis	Uric acid	0.0529707	0.701926
Phascolarctobacterium_faecium	Uric acid	-0.025335	0.869802
Phascolarctobacterium_succinatutens	Uric acid	0.0610494	0.637267
Prevotella_copri	Uric acid	-0.0104073	0.957453
Roseburia_faecis	Uric acid	-0.12642	0.171416
Ruminococcus_bicirculans	Uric acid	-0.160721	0.0625901
Streptococcus_salivarius	Uric acid	-0.064306	0.626969
Bacteroides_finegoldii	Urea	0.0431841	0.76748
Bacteroides_plebeius	Urea	-0.0256728	0.868042
Bacteroides_stercoris	Urea	0.0436991	0.76748
Bacteroides_clarus	Urea	0.0577329	0.674342
Bacteroides_ovatus	Urea	0.00833589	0.967554
Bacteroides_thetaiotaomicron	Urea	0.0288449	0.853382
Bacteroides_uniformis	Urea	0.035978	0.799201
Bacteroides_vulgatus	Urea	0.0680719	0.615194
Bifidobacterium_longum	Urea	-0.0887145	0.445727
Ruminococcus_gnavus	Urea	0.0420452	0.76748
Ruminococcus_torques	Urea	-0.0470255	0.749215
Blautia_wexlerae	Urea	-0.0227964	0.887257
Clostridium_sp_CAG_299	Urea	0.0576047	0.674342
Clostridium_sp_CAG_58	Urea	0.0449943	0.764103
Clostridium_bolteae_CAG_59	Urea	0.0866993	0.445823
Collinsella_aerofaciens	Urea	0.0271693	0.868042
Dorea_longicatena	Urea	0.0795395	0.50441
Erysipelatoclostridium_ramosum	Urea	0.00355192	0.981477
Escherichia_coli	Urea	-0.0985628	0.369331
Eubacterium_sp_CAG_180	Urea	0.025508	0.86885
Faecalibacterium_prausnitzii	Urea	-0.0414693	0.76748
Faecalicatena_orotica	Urea	0.0204156	0.904824
Flavonifractor_plautii	Urea	0.109352	0.297819
Fusobacterium_ulcerans	Urea	0.0864892	0.445823
Klebsiella_quasipneumoniae	Urea	0.0745417	0.544865
Clostridium_symbiosum	Urea	0.0256974	0.868042
Clostridium_bolteae	Urea	0.0472649	0.749025
Lachnospira_pectinoschiza	Urea	-0.112784	0.262086
Massiliomicrobiota_timonensis	Urea	-0.0567157	0.674897
Megamonas_rupellensis	Urea	-0.0651915	0.626969
Parabacteroides_distasonis	Urea	0.13356	0.141224
Phascolarctobacterium_faecium	Urea	0.151579	0.0848878
Phascolarctobacterium_succinatutens	Urea	-0.00563556	0.979514
Prevotella_copri	Urea	-0.0808981	0.493238
Roseburia_faecis	Urea	-0.0686393	0.614423
Ruminococcus_bicirculans	Urea	-0.0409902	0.76748
Streptococcus_salivarius	Urea	-0.0266285	0.868042
Bacteroides_finegoldii	Creatinine	0.013392	0.941949
Bacteroides_plebeius	Creatinine	0.127444	0.168108
Bacteroides_stercoris	Creatinine	0.0809616	0.493238
Bacteroides_clarus	Creatinine	-0.0360879	0.799201
Bacteroides_ovatus	Creatinine	-0.0588284	0.660407
Bacteroides_thetaiotaomicron	Creatinine	0.00376988	0.981477
Bacteroides_uniformis	Creatinine	-0.0905332	0.445727
Bacteroides_vulgatus	Creatinine	0.0926376	0.418802
Bifidobacterium_longum	Creatinine	-0.161459	0.0621464
Ruminococcus_gnavus	Creatinine	0.156613	0.072789
Ruminococcus_torques	Creatinine	0.0880154	0.445727
Blautia_wexlerae	Creatinine	0.067811	0.615194
Clostridium_sp_CAG_299	Creatinine	0.0841824	0.46292
Clostridium_sp_CAG_58	Creatinine	0.0620815	0.633382
Clostridium_bolteae_CAG_59	Creatinine	-0.00792052	0.967604
Collinsella_aerofaciens	Creatinine	0.0230762	0.887257
Dorea_longicatena	Creatinine	0.0322736	0.833447
Erysipelatoclostridium_ramosum	Creatinine	0.0609135	0.637267
Escherichia_coli	Creatinine	0.0655577	0.623907
Eubacterium_sp_CAG_180	Creatinine	-0.0342996	0.810701
Faecalibacterium_prausnitzii	Creatinine	-0.0936366	0.411736
Faecalicatena_orotica	Creatinine	0.0473691	0.749025
Flavonifractor_plautii	Creatinine	0.0296405	0.851082
Fusobacterium_ulcerans	Creatinine	0.189191	0.0285536
Klebsiella_quasipneumoniae	Creatinine	0.0836424	0.468178
Clostridium_symbiosum	Creatinine	-0.0192768	0.913225
Clostridium_bolteae	Creatinine	0.024184	0.879736
Lachnospira_pectinoschiza	Creatinine	-0.0570147	0.674342
Massiliomicrobiota_timonensis	Creatinine	-0.096358	0.384406
Megamonas_rupellensis	Creatinine	0.062112	0.633382
Parabacteroides_distasonis	Creatinine	0.1224	0.185671
Phascolarctobacterium_faecium	Creatinine	0.100628	0.355102
Phascolarctobacterium_succinatutens	Creatinine	0.0166099	0.934293
Prevotella_copri	Creatinine	-0.00525336	0.979514
Roseburia_faecis	Creatinine	-0.184992	0.0285536
Ruminococcus_bicirculans	Creatinine	-0.086709	0.445823
Streptococcus_salivarius	Creatinine	-0.106803	0.313247
Bacteroides_finegoldii	eGFR	-0.00537075	0.979514
Bacteroides_plebeius	eGFR	0.0184466	0.917351
Bacteroides_stercoris	eGFR	-0.0473264	0.749025
Bacteroides_clarus	eGFR	0.0154666	0.939433
Bacteroides_ovatus	eGFR	-0.0149341	0.941949
Bacteroides_thetaiotaomicron	eGFR	-0.0738194	0.553371
Bacteroides_uniformis	eGFR	-0.00454677	0.979514
Bacteroides_vulgatus	eGFR	-0.0263578	0.868042
Bifidobacterium_longum	eGFR	0.206651	0.0240421
Ruminococcus_gnavus	eGFR	-0.134689	0.138213
Ruminococcus_torques	eGFR	0.0327035	0.830556
Blautia_wexlerae	eGFR	-0.0333308	0.823242
Clostridium_sp_CAG_299	eGFR	0.00480204	0.979514
Clostridium_sp_CAG_58	eGFR	-0.0161014	0.936837
Clostridium_bolteae_CAG_59	eGFR	-0.00231067	0.987594
Collinsella_aerofaciens	eGFR	0.0546435	0.692515
Dorea_longicatena	eGFR	0.0631827	0.633382
Erysipelatoclostridium_ramosum	eGFR	-0.0980251	0.372874
Escherichia_coli	eGFR	-0.0397483	0.7697
Eubacterium_sp_CAG_180	eGFR	-0.0141732	0.941949
Faecalibacterium_prausnitzii	eGFR	0.162466	0.0621464
Faecalicatena_orotica	eGFR	-0.0703997	0.595348
Flavonifractor_plautii	eGFR	-0.0856919	0.452748
Fusobacterium_ulcerans	eGFR	-0.161693	0.0621464
Klebsiella_quasipneumoniae	eGFR	-0.0182837	0.917351
Clostridium_symbiosum	eGFR	0.0194437	0.91241
Clostridium_bolteae	eGFR	-0.0875678	0.445823
Lachnospira_pectinoschiza	eGFR	0.0886516	0.445727
Massiliomicrobiota_timonensis	eGFR	0.0711167	0.589161
Megamonas_rupellensis	eGFR	0.0211597	0.899201
Parabacteroides_distasonis	eGFR	-0.153771	0.0798648
Phascolarctobacterium_faecium	eGFR	-0.0447056	0.764103
Phascolarctobacterium_succinatutens	eGFR	-0.00344778	0.981477
Prevotella_copri	eGFR	0.0984914	0.369331
Roseburia_faecis	eGFR	0.18133	0.0321324
Ruminococcus_bicirculans	eGFR	0.0570182	0.674342
Streptococcus_salivarius	eGFR	0.144953	0.0995978
Abbreviation: eGFR: estimated glomerular filtration rate; HDL: high-density lipoprotein; LDL: low-density lipoprotein; AST: aspartate transaminase; ALT: alanine aminotransferase; SBP: Systolic blood pressure; DBP: Diastolic blood pressure

## Sheet: Table S6
Table S6. MetaCyc Pathways Exhibiting Significant Differences in Abundance between Shiyan and Wuhan population
Feature	Pathway	Total	Shiyan	Wuhan
1CMET2-PWY	folate transformations III (E. coli)	100	100	100
ANAEROFRUCAT-PWY	homolactic fermentation	100	100	100
ANAGLYCOLYSIS-PWY	glycolysis III (from glucose)	100	100	100
ARG+POLYAMINE-SYN	superpathway of arginine and polyamine biosynthesis	100	100	100
ARGININE-SYN4-PWY	L-ornithine biosynthesis II	100	100	100
ARGSYNBSUB-PWY	L-arginine biosynthesis II (acetyl cycle)	100	100	100
ARGSYN-PWY	L-arginine biosynthesis I (via L-ornithine)	100	100	100
ARO-PWY	chorismate biosynthesis I	100	100	100
ASPASN-PWY	superpathway of L-aspartate and L-asparagine biosynthesis	100	100	100
BIOTIN-BIOSYNTHESIS-PWY	biotin biosynthesis I	100	100	100
BRANCHED-CHAIN-AA-SYN-PWY	superpathway of branched chain amino acid biosynthesis	100	100	100
CALVIN-PWY	Calvin-Benson-Bassham cycle	100	100	100
CITRULBIO-PWY	L-citrulline biosynthesis	100	100	100
COA-PWY	coenzyme A biosynthesis I (prokaryotic)	100	100	100
COBALSYN-PWY	superpathway of adenosylcobalamin salvage from cobinamide I	100	100	100
COLANSYN-PWY	colanic acid building blocks biosynthesis	100	100	100
COMPLETE-ARO-PWY	superpathway of aromatic amino acid biosynthesis	100	100	100
DTDPRHAMSYN-PWY	dTDP-&beta;-L-rhamnose biosynthesis	100	100	100
FASYN-ELONG-PWY	fatty acid elongation -- saturated	100	100	100
FERMENTATION-PWY	mixed acid fermentation	100	100	100
FUCCAT-PWY	fucose degradation	100	100	100
FUC-RHAMCAT-PWY	superpathway of fucose and rhamnose degradation	100	100	100
GALACT-GLUCUROCAT-PWY	superpathway of hexuronide and hexuronate degradation	100	100	100
GALACTUROCAT-PWY	D-galacturonate degradation I	100	100	100
GLCMANNANAUT-PWY	superpathway of N-acetylglucosamine, N-acetylmannosamine and N-acetylneuraminate degradation	100	100	100
GLUCONEO-PWY	gluconeogenesis I	100	100	100
GLUCUROCAT-PWY	superpathway of &beta;-D-glucuronosides degradation	100	100	100
GLUTORN-PWY	L-ornithine biosynthesis I	100	100	100
GLYCOCAT-PWY	glycogen degradation I	100	100	100
GLYCOGENSYNTH-PWY	glycogen biosynthesis I (from ADP-D-Glucose)	100	100	100
GLYCOLYSIS	glycolysis I (from glucose 6-phosphate)	100	100	100
GLYCOLYSIS-E-D	superpathway of glycolysis and the Entner-Doudoroff pathway	100	100	100
GOLPDLCAT-PWY	superpathway of glycerol degradation to 1,3-propanediol	100	100	100
HEMESYN2-PWY	heme b biosynthesis II (oxygen-independent)	100	100	100
HISDEG-PWY	L-histidine degradation I	100	100	100
HISTSYN-PWY	L-histidine biosynthesis	100	100	100
HSERMETANA-PWY	L-methionine biosynthesis III	100	100	100
ILEUSYN-PWY	L-isoleucine biosynthesis I (from threonine)	100	100	100
NAGLIPASYN-PWY	lipid IVA biosynthesis (E. coli)	100	100	100
NONMEVIPP-PWY	methylerythritol phosphate pathway I	100	100	100
NONOXIPENT-PWY	pentose phosphate pathway (non-oxidative branch) I	100	100	100
OANTIGEN-PWY	O-antigen building blocks biosynthesis (E. coli)	100	100	100
P161-PWY	acetylene degradation (anaerobic)	100	100	100
P41-PWY	pyruvate fermentation to acetate and (S)-lactate I	100	100	100
P441-PWY	superpathway of N-acetylneuraminate degradation	100	100	100
P461-PWY	hexitol fermentation to lactate, formate, ethanol and acetate	100	100	100
PANTO-PWY	phosphopantothenate biosynthesis I	100	100	100
PANTOSYN-PWY	superpathway of coenzyme A biosynthesis I (bacteria)	100	100	100
PENTOSE-P-PWY	pentose phosphate pathway	100	100	100
PEPTIDOGLYCANSYN-PWY	peptidoglycan biosynthesis I (meso-diaminopimelate containing)	100	100	100
PHOSLIPSYN-PWY	superpathway of phospholipid biosynthesis I (bacteria)	100	100	100
POLYAMSYN-PWY	superpathway of polyamine biosynthesis I	100	100	100
POLYISOPRENSYN-PWY	polyisoprenoid biosynthesis (E. coli)	100	100	100
PWY0-1241	ADP-L-glycero-&beta;-D-manno-heptose biosynthesis	100	100	100
PWY0-1261	anhydromuropeptides recycling I	100	100	100
PWY0-1296	purine ribonucleosides degradation	100	100	100
PWY0-1297	superpathway of purine deoxyribonucleosides degradation	100	100	100
PWY0-1298	superpathway of pyrimidine deoxyribonucleosides degradation	100	100	100
PWY0-1319	CDP-diacylglycerol biosynthesis II	100	100	100
PWY0-1477	ethanolamine utilization	100	100	100
PWY0-1479	tRNA processing	100	100	100
PWY0-1586	peptidoglycan maturation (meso-diaminopimelate containing)	100	100	100
PWY0-162	superpathway of pyrimidine ribonucleotides de novo biosynthesis	100	100	100
PWY0-845	superpathway of pyridoxal 5'-phosphate biosynthesis and salvage	100	100	100
PWY0-862	(5Z)-dodecenoate biosynthesis I	100	100	100
PWY-1042	glycolysis IV	100	100	100
PWY-1269	CMP-3-deoxy-D-manno-octulosonate biosynthesis	100	100	100
PWY-2941	L-lysine biosynthesis II	100	100	100
PWY-2942	L-lysine biosynthesis III	100	100	100
PWY-3001	superpathway of L-isoleucine biosynthesis I	100	100	100
PWY-4984	urea cycle	100	100	100
PWY4FS-7	phosphatidylglycerol biosynthesis I (plastidic)	100	100	100
PWY4FS-8	phosphatidylglycerol biosynthesis II (non-plastidic)	100	100	100
PWY4LZ-257	superpathway of fermentation (Chlamydomonas reinhardtii)	100	100	100
PWY-5030	L-histidine degradation III	100	100	100
PWY-5097	L-lysine biosynthesis VI	100	100	100
PWY-5100	pyruvate fermentation to acetate and lactate II	100	100	100
PWY-5103	L-isoleucine biosynthesis III	100	100	100
PWY-5121	superpathway of geranylgeranyl diphosphate biosynthesis II (via MEP)	100	100	100
PWY-5154	L-arginine biosynthesis III (via N-acetyl-L-citrulline)	100	100	100
PWY-5188	tetrapyrrole biosynthesis I (from glutamate)	100	100	100
PWY-5384	sucrose degradation IV (sucrose phosphorylase)	100	100	100
PWY-5484	glycolysis II (from fructose 6-phosphate)	100	100	100
PWY-5505	L-glutamate and L-glutamine biosynthesis	100	100	100
PWY-5659	GDP-mannose biosynthesis	100	100	100
PWY-5667	CDP-diacylglycerol biosynthesis I	100	100	100
PWY-5676	acetyl-CoA fermentation to butanoate II	100	100	100
PWY-5686	UMP biosynthesis I	100	100	100
PWY-5695	inosine 5'-phosphate degradation	100	100	100
PWY-5941	glycogen degradation II	100	100	100
PWY-5973	cis-vaccenate biosynthesis	100	100	100
PWY-5989	stearate biosynthesis II (bacteria and plants)	100	100	100
PWY-6121	5-aminoimidazole ribonucleotide biosynthesis I	100	100	100
PWY-6122	5-aminoimidazole ribonucleotide biosynthesis II	100	100	100
PWY-6123	inosine-5'-phosphate biosynthesis I	100	100	100
PWY-6124	inosine-5'-phosphate biosynthesis II	100	100	100
PWY-6125	superpathway of guanosine nucleotides de novo biosynthesis II	100	100	100
PWY-6126	superpathway of adenosine nucleotides de novo biosynthesis II	100	100	100
PWY-6147	6-hydroxymethyl-dihydropterin diphosphate biosynthesis I	100	100	100
PWY-6151	S-adenosyl-L-methionine salvage I	100	100	100
PWY-6163	chorismate biosynthesis from 3-dehydroquinate	100	100	100
PWY-621	sucrose degradation III (sucrose invertase)	100	100	100
PWY-6270	isoprene biosynthesis I	100	100	100
PWY-6277	superpathway of 5-aminoimidazole ribonucleotide biosynthesis	100	100	100
PWY-6282	palmitoleate biosynthesis I (from (5Z)-dodec-5-enoate)	100	100	100
PWY-6305	superpathway of putrescine biosynthesis	100	100	100
PWY-6317	D-galactose degradation I (Leloir pathway)	100	100	100
PWY-6385	peptidoglycan biosynthesis III (mycobacteria)	100	100	100
PWY-6386	UDP-N-acetylmuramoyl-pentapeptide biosynthesis II (lysine-containing)	100	100	100
PWY-6387	UDP-N-acetylmuramoyl-pentapeptide biosynthesis I (meso-diaminopimelate containing)	100	100	100
PWY-6507	4-deoxy-L-threo-hex-4-enopyranuronate degradation	100	100	100
PWY-6519	8-amino-7-oxononanoate biosynthesis I	100	100	100
PWY-6527	stachyose degradation	100	100	100
PWY-6549	L-glutamine biosynthesis III	100	100	100
PWY-6608	guanosine nucleotides degradation III	100	100	100
PWY-6609	adenine and adenosine salvage III	100	100	100
PWY-6628	superpathway of L-phenylalanine biosynthesis	100	100	100
PWY-6630	superpathway of L-tyrosine biosynthesis	100	100	100
PWY66-409	superpathway of purine nucleotide salvage	100	100	100
PWY66-429	fatty acid biosynthesis initiation (mitochondria)	100	100	100
PWY-6700	queuosine biosynthesis I (de novo)	100	100	100
PWY-6703	preQ0 biosynthesis	100	100	100
PWY-6731	starch degradation III	100	100	100
PWY-6823	molybdopterin biosynthesis	100	100	100
PWY-6859	all-trans-farnesol biosynthesis	100	100	100
PWY-6897	thiamine diphosphate salvage II	100	100	100
PWY-6901	superpathway of glucose and xylose degradation	100	100	100
PWY-6902	chitin degradation II (Vibrio)	100	100	100
PWY-6969	TCA cycle V (2-oxoglutarate synthase)	100	100	100
PWY-702	L-methionine biosynthesis II	100	100	100
PWY-7111	pyruvate fermentation to isobutanol (engineered)	100	100	100
PWY-7197	pyrimidine deoxyribonucleotide phosphorylation	100	100	100
PWY-7198	pyrimidine deoxyribonucleotides de novo biosynthesis IV	100	100	100
PWY-7199	pyrimidine deoxyribonucleosides salvage	100	100	100
PWY-7208	superpathway of pyrimidine nucleobases salvage	100	100	100
PWY-7220	adenosine deoxyribonucleotides de novo biosynthesis II	100	100	100
PWY-7221	guanosine ribonucleotides de novo biosynthesis	100	100	100
PWY-7222	guanosine deoxyribonucleotides de novo biosynthesis II	100	100	100
PWY-7228	superpathway of guanosine nucleotides de novo biosynthesis I	100	100	100
PWY-7229	superpathway of adenosine nucleotides de novo biosynthesis I	100	100	100
PWY-7234	inosine-5'-phosphate biosynthesis III	100	100	100
PWY-7238	sucrose biosynthesis II	100	100	100
PWY-724	superpathway of L-lysine, L-threonine and L-methionine biosynthesis II	100	100	100
PWY-7242	D-fructuronate degradation	100	100	100
PWY-7282	4-amino-2-methyl-5-diphosphomethylpyrimidine biosynthesis II	100	100	100
PWY-7323	superpathway of GDP-mannose-derived O-antigen building blocks biosynthesis	100	100	100
PWY-7328	superpathway of UDP-glucose-derived O-antigen building blocks biosynthesis	100	100	100
PWY-7345	superpathway of anaerobic sucrose degradation	100	100	100
PWY-7560	methylerythritol phosphate pathway II	100	100	100
PWY-7663	gondoate biosynthesis (anaerobic)	100	100	100
PWY-7664	oleate biosynthesis IV (anaerobic)	100	100	100
PWY-7761	NAD salvage pathway II (PNC IV cycle)	100	100	100
PWY-7790	UMP biosynthesis II	100	100	100
PWY-7791	UMP biosynthesis III	100	100	100
PWY-7851	coenzyme A biosynthesis II (eukaryotic)	100	100	100
PWY-7953	UDP-N-acetylmuramoyl-pentapeptide biosynthesis III (meso-diaminopimelate containing)	100	100	100
PWY-7977	L-methionine biosynthesis IV	100	100	100
PWY-8004	Entner-Doudoroff pathway I	100	100	100
PWY-8073	lipid IVA biosynthesis (P. putida)	100	100	100
PWY-8131	5'-deoxyadenosine degradation II	100	100	100
PWY-8178	pentose phosphate pathway (non-oxidative branch) II	100	100	100
PWY-8187	L-arginine degradation XIII (reductive Stickland reaction)	100	100	100
PWY-841	superpathway of purine nucleotides de novo biosynthesis I	100	100	100
PWY-I9	L-cysteine biosynthesis VI (from L-methionine)	100	100	100
PYRIDNUCSYN-PWY	NAD de novo biosynthesis I (from aspartate)	100	100	100
PYRIDOXSYN-PWY	pyridoxal 5'-phosphate biosynthesis I	100	100	100
RHAMCAT-PWY	L-rhamnose degradation I	100	100	100
RIBOSYN2-PWY	flavin biosynthesis I (bacteria and plants)	100	100	100
SER-GLYSYN-PWY	superpathway of L-serine and glycine biosynthesis I	100	100	100
THISYNARA-PWY	superpathway of thiamine diphosphate biosynthesis III (eukaryotes)	100	100	100
THRESYN-PWY	superpathway of L-threonine biosynthesis	100	100	100
TRNA-CHARGING-PWY	tRNA charging	100	100	100
UDPNAGSYN-PWY	UDP-N-acetyl-D-glucosamine biosynthesis I	100	100	100
VALSYN-PWY	L-valine biosynthesis	100	100	100
DAPLYSINESYN-PWY	L-lysine biosynthesis I	99.7375	99.4924	100
P42-PWY	incomplete reductive TCA cycle	99.7375	99.4924	100
PPGPPMET-PWY	ppGpp metabolism	99.7375	99.4924	100
PWY-4041	&gamma;-glutamyl cycle	99.7375	99.4924	100
PWY-5497	purine nucleobases degradation II (anaerobic)	99.7375	100	99.4565
PWY-6353	purine nucleotides degradation II (aerobic)	99.7375	100	99.4565
PWY-6606	guanosine nucleotides degradation II	99.7375	100	99.4565
PWY-7392	taxadiene biosynthesis (engineered)	99.7375	99.4924	100
PWY-7456	&beta;-(1,4)-mannan degradation	99.7375	100	99.4565
SALVADEHYPOX-PWY	adenosine nucleotides degradation II	99.7375	100	99.4565
GALACTARDEG-PWY	D-galactarate degradation I	99.4751	98.9848	100
GLUCARDEG-PWY	D-glucarate degradation I	99.4751	98.9848	100
GLUCARGALACTSUPER-PWY	superpathway of D-glucarate and D-galactarate degradation	99.4751	98.9848	100
HEME-BIOSYNTHESIS-II	heme b biosynthesis I (aerobic)	99.4751	98.9848	100
P164-PWY	purine nucleobases degradation I (anaerobic)	99.4751	99.4924	99.4565
PWY-5345	superpathway of L-methionine biosynthesis (by sulfhydrylation)	99.4751	98.9848	100
PWY-6531	mannitol cycle	99.4751	98.9848	100
PWY-6588	pyruvate fermentation to acetone	99.4751	98.9848	100
PWY-6895	superpathway of thiamine diphosphate biosynthesis II	99.4751	99.4924	99.4565
SO4ASSIM-PWY	assimilatory sulfate reduction I	99.4751	98.9848	100
SULFATE-CYS-PWY	superpathway of sulfate assimilation and cysteine biosynthesis	99.4751	98.9848	100
PWY1ZNC-1	assimilatory sulfate reduction IV	99.2126	98.9848	99.4565
PWY-6470	peptidoglycan biosynthesis V (&beta;-lactam resistance)	99.2126	98.4772	100
PWY-6545	pyrimidine deoxyribonucleotides de novo biosynthesis III	99.2126	98.4772	100
PWY-7184	pyrimidine deoxyribonucleotides de novo biosynthesis I	99.2126	98.4772	100
PWY-7211	superpathway of pyrimidine deoxyribonucleotides de novo biosynthesis	99.2126	98.4772	100
PWY-7315	dTDP-N-acetylthomosamine biosynthesis	99.2126	99.4924	98.913
PWY-7883	anhydromuropeptides recycling II	99.2126	99.4924	98.913
METH-ACETATE-PWY	methanogenesis from acetate	98.9501	98.4772	99.4565
FOLSYN-PWY	superpathway of tetrahydrofolate biosynthesis and salvage	98.6877	97.4619	100
LACTOSECAT-PWY	lactose and galactose degradation I	98.6877	97.9695	99.4565
PWY-6612	superpathway of tetrahydrofolate biosynthesis	98.6877	97.4619	100
PWY-7237	myo-, chiro- and scyllo-inositol degradation	98.6877	98.9848	98.3696
CENTFERM-PWY	pyruvate fermentation to butanoate	98.4252	97.9695	98.913
P185-PWY	formaldehyde assimilation III (dihydroxyacetone cycle)	98.4252	97.9695	98.913
PWY0-1061	superpathway of L-alanine biosynthesis	98.4252	97.9695	98.913
PWY-5005	biotin biosynthesis II	98.4252	97.4619	99.4565
PWY-5130	2-oxobutanoate degradation I	98.4252	97.9695	98.913
PWY-5913	partial TCA cycle (obligate autotrophs)	98.4252	98.4772	98.3696
PWY-6590	superpathway of Clostridium acetobutylicum acidogenic fermentation	98.4252	97.9695	98.913
PWY-241	C4 photosynthetic carbon assimilation cycle, NADP-ME type	98.1627	97.9695	98.3696
PWY-7115	C4 photosynthetic carbon assimilation cycle, NAD-ME type	98.1627	97.4619	98.913
PWY-7117	C4 photosynthetic carbon assimilation cycle, PEPCK type	98.1627	97.9695	98.3696
PWY-7013	(S)-propane-1,2-diol degradation	97.3753	95.4315	99.4565
HOMOSER-METSYN-PWY	L-methionine biosynthesis I	97.1129	96.9543	97.2826
MET-SAM-PWY	superpathway of S-adenosyl-L-methionine biosynthesis	97.1129	96.9543	97.2826
METSYN-PWY	superpathway of L-homoserine and L-methionine biosynthesis	97.1129	96.9543	97.2826
PWY-5347	superpathway of L-methionine biosynthesis (transsulfuration)	97.1129	96.9543	97.2826
PWY-1861	formaldehyde assimilation II (assimilatory RuMP Cycle)	96.8504	95.9391	97.8261
GLUCOSE1PMETAB-PWY	glucose and glucose-1-phosphate degradation	96.5879	93.401	100
PWY-6922	L-N&delta;-acetylornithine biosynthesis	96.5879	95.9391	97.2826
PWY-5918	superpathway of heme b biosynthesis from glutamate	96.3255	94.4162	98.3696
P4-PWY	superpathway of L-lysine, L-threonine and L-methionine biosynthesis I	96.063	95.9391	96.1957
PWY0-781	aspartate superpathway	96.063	95.9391	96.1957
PWY-5837	2-carboxy-1,4-naphthoquinol biosynthesis	96.063	93.401	98.913
PWY-5838	superpathway of menaquinol-8 biosynthesis I	96.063	93.401	98.913
PWY-5861	superpathway of demethylmenaquinol-8 biosynthesis I	96.063	93.401	98.913
PWY-5897	superpathway of menaquinol-11 biosynthesis	96.063	93.401	98.913
PWY-5898	superpathway of menaquinol-12 biosynthesis	96.063	93.401	98.913
PWY-5899	superpathway of menaquinol-13 biosynthesis	96.063	93.401	98.913
GLUDEG-I-PWY	GABA shunt	95.8005	94.4162	97.2826
PWY66-389	phytol degradation	95.8005	94.4162	97.2826
PWY66-399	gluconeogenesis III	95.8005	95.9391	95.6522
PWY-7383	anaerobic energy metabolism (invertebrates, cytosol)	95.8005	95.9391	95.6522
PWY-5845	superpathway of menaquinol-9 biosynthesis	95.2756	91.8782	98.913
PWY-5862	superpathway of demethylmenaquinol-9 biosynthesis	95.2756	91.8782	98.913
PWY-5022	4-aminobutanoate degradation V	95.0131	92.8934	97.2826
PWY-5840	superpathway of menaquinol-7 biosynthesis	95.0131	91.8782	98.3696
PWY-5189	tetrapyrrole biosynthesis II (from glycine)	94.4882	92.3858	96.7391
PWY-7210	pyrimidine deoxyribonucleotides biosynthesis from CTP	94.4882	93.401	95.6522
HEME-BIOSYNTHESIS-II-1	heme b biosynthesis V (aerobic)	94.2257	92.8934	95.6522
PWY-821	superpathway of sulfur amino acid biosynthesis (Saccharomyces cerevisiae)	93.4383	90.8629	96.1957
GLYOXYLATE-BYPASS	glyoxylate cycle	93.1759	89.8477	96.7391
PWY3O-4107	NAD salvage pathway V (PNC V cycle)	93.1759	89.8477	96.7391
PYRIDNUCSAL-PWY	NAD salvage pathway I (PNC VI cycle)	93.1759	89.8477	96.7391
METHGLYUT-PWY	superpathway of methylglyoxal degradation	92.9134	91.8782	94.0217
PWY-5723	Rubisco shunt	92.9134	91.8782	94.0217
PWY-6803	phosphatidylcholine acyl editing	92.9134	90.8629	95.1087
ORNDEG-PWY	superpathway of ornithine degradation	92.6509	89.8477	95.6522
P108-PWY	pyruvate fermentation to propanoate I	92.6509	90.3553	95.1087
POLYAMINSYN3-PWY	superpathway of polyamine biosynthesis II	92.6509	90.3553	95.1087
PWY-6572	chondroitin sulfate degradation I (bacterial)	92.6509	91.3706	94.0217
PWY-6906	chitin derivatives degradation	92.126	91.3706	92.9348
P105-PWY	TCA cycle IV (2-oxoglutarate decarboxylase)	91.8635	89.3401	94.5652
PWY0-1415	superpathway of heme b biosynthesis from uroporphyrinogen-III	91.8635	89.8477	94.0217
PWY-5981	CDP-diacylglycerol biosynthesis III	91.3386	87.3096	95.6522
PWY-7118	chitin deacetylation	91.0761	86.802	95.6522
REDCITCYC	TCA cycle VI (Helicobacter)	91.0761	89.3401	92.9348
PWY-5675	nitrate reduction V (assimilatory)	90.8136	86.2944	95.6522
TCA	TCA cycle I (prokaryotic)	90.8136	86.802	95.1087
PWY0-166	superpathway of pyrimidine deoxyribonucleotides de novo biosynthesis (E. coli)	90.5512	87.8173	93.4783
PWY-5367	petroselinate biosynthesis	90.5512	88.3249	92.9348
PWY-5971	palmitate biosynthesis (type II fatty acid synthase)	90.5512	88.3249	92.9348
PWY-6284	superpathway of unsaturated fatty acids biosynthesis (E. coli)	90.5512	88.3249	92.9348
NAD-BIOSYNTHESIS-II	NAD salvage pathway III (to nicotinamide riboside)	90.2887	87.3096	93.4783
PWY-6607	guanosine nucleotides degradation I	90.0262	88.3249	91.8478
PWY-7858	(5Z)-dodecenoate biosynthesis II	89.2388	88.3249	90.2174
PWY0-301	L-ascorbate degradation I (bacterial, anaerobic)	88.9764	84.264	94.0217
PWY-6961	L-ascorbate degradation II (bacterial, aerobic)	88.7139	84.264	93.4783
GALACTITOLCAT-PWY	galactitol degradation	87.1391	82.7411	91.8478
PWY-561	superpathway of glyoxylate cycle and fatty acid degradation	87.1391	82.2335	92.3913
HEXITOLDEGSUPER-PWY	superpathway of hexitol degradation (bacteria)	86.8766	82.2335	91.8478
FAO-PWY	fatty acid &beta;-oxidation I (generic)	86.6142	83.2487	90.2174
P122-PWY	heterolactic fermentation	86.3517	83.7563	89.1304
PWY-5138	fatty acid &beta;-oxidation IV (unsaturated, even number)	86.0892	82.2335	90.2174
PWY-5494	pyruvate fermentation to propanoate II (acrylate pathway)	86.0892	84.264	88.0435
KETOGLUCONMET-PWY	ketogluconate metabolism	85.8268	82.7411	89.1304
PWY-7942	5-oxo-L-proline metabolism	85.8268	82.7411	89.1304
TCA-GLYOX-BYPASS	superpathway of glyoxylate bypass and TCA	85.8268	80.203	91.8478
PROPFERM-PWY	superpathway of L-alanine fermentation (Stickland reaction)	85.3018	82.7411	88.0435
PWY-8188	L-alanine degradation VI (reductive Stickland reaction)	85.3018	82.7411	88.0435
PWY-8189	L-alanine degradation V (oxidative Stickland reaction)	85.3018	82.7411	88.0435
PWY-5850	superpathway of menaquinol-6 biosynthesis	84.7769	81.2183	88.587
PWY-5860	superpathway of demethylmenaquinol-6 biosynthesis I	84.7769	81.2183	88.587
PWY-5896	superpathway of menaquinol-10 biosynthesis	84.7769	81.2183	88.587
PWY-5920	superpathway of heme b biosynthesis from glycine	84.7769	80.203	89.6739
PWY-6285	superpathway of fatty acids biosynthesis (E. coli)	83.727	82.2335	85.3261
PWY-6992	1,5-anhydrofructose degradation	83.2021	79.1878	87.5
PWY-801	homocysteine and cysteine interconversion	83.2021	80.7107	85.8696
PWY490-3	nitrate reduction VI (assimilatory)	82.9396	84.7716	80.9783
HCAMHPDEG-PWY	3-phenylpropanoate and 3-(3-hydroxyphenyl)propanoate degradation to 2-hydroxypentadienoate	82.4147	78.6802	86.413
PWY-5104	L-isoleucine biosynthesis IV	82.4147	75.6345	89.6739
PWY-6690	cinnamate and 3-hydroxycinnamate degradation to 2-hydroxypentadienoate	82.4147	78.6802	86.413
PWY-7385	1,3-propanediol biosynthesis (engineered)	82.4147	77.665	87.5
GLYCOL-GLYOXDEG-PWY	superpathway of glycol metabolism and degradation	82.1522	78.6802	85.8696
PWY-7209	superpathway of pyrimidine ribonucleosides degradation	82.1522	77.665	86.9565
AST-PWY	L-arginine degradation II (AST pathway)	81.3648	77.665	85.3261
PWY0-1277	3-phenylpropanoate and 3-(3-hydroxyphenyl)propanoate degradation	81.3648	78.1726	84.7826
PWY-5855	ubiquinol-7 biosynthesis (early decarboxylation)	81.1024	77.1574	85.3261
P221-PWY	octane oxidation	80.8399	77.665	84.2391
PWY0-1338	polymyxin resistance	80.5774	75.6345	85.8696
PWY-7094	fatty acid salvage	80.5774	74.6193	86.9565
PWY0-42	2-methylcitrate cycle I	80.315	73.0964	88.0435
DARABCATK12-PWY	D-arabinose degradation I	79.79	75.6345	84.2391
PWY-6807	xyloglucan degradation II (exoglucanase)	79.5276	79.1878	79.8913
DENOVOPURINE2-PWY	superpathway of purine nucleotides de novo biosynthesis II	79.2651	77.1574	81.5217
PRPP-PWY	superpathway of histidine, purine, and pyrimidine biosynthesis	79.2651	77.1574	81.5217
PWY-6478	GDP-D-glycero-&alpha;-D-manno-heptose biosynthesis	79.2651	79.1878	79.3478
PWY-7187	pyrimidine deoxyribonucleotides de novo biosynthesis II	79.2651	77.1574	81.5217
PWY0-1337	oleate &beta;-oxidation	78.7402	72.0812	85.8696
KDO-NAGLIPASYN-PWY	superpathway of (Kdo)2-lipid A biosynthesis	78.4777	74.6193	82.6087
P124-PWY	Bifidobacterium shunt	78.2152	74.1117	82.6087
PWY-5656	mannosylglycerate biosynthesis I	77.9528	74.6193	81.5217
ECASYN-PWY	enterobacterial common antigen biosynthesis	77.4278	71.5736	83.6957
PWY-5705	allantoin degradation to glyoxylate III	77.1654	73.0964	81.5217
PWY-5747	2-methylcitrate cycle II	74.8031	68.5279	81.5217
PWY-6749	CMP-legionaminate biosynthesis I	74.5407	73.6041	75.5435
GLYCOLYSIS-TCA-GLYOX-BYPASS	superpathway of glycolysis, pyruvate dehydrogenase, TCA, and glyoxylate bypass	73.4908	66.4975	80.9783
P23-PWY	reductive TCA cycle I	72.1785	71.5736	72.8261
PWY-7254	TCA cycle VII (acetate-producers)	71.916	70.0508	73.913
PWY-5677	succinate fermentation to butanoate	71.6535	68.5279	75
PWY0-41	allantoin degradation IV (anaerobic)	70.0787	65.4822	75
PWY-7312	dTDP-&beta;-D-fucofuranose biosynthesis	69.8163	69.5431	70.1087
PWY-7316	dTDP-N-acetylviosamine biosynthesis	69.8163	67.5127	72.2826
PWY-8086	(S)-lactate fermentation to propanoate, acetate and hydrogen	67.1916	61.9289	72.8261
THREOCAT-PWY	superpathway of L-threonine metabolism	67.1916	60.4061	74.4565
PWY-7446	sulfoquinovose degradation I	65.6168	60.9137	70.6522
PWY0-1533	methylphosphonate degradation I	65.3543	57.868	73.3696
PWY0-461	L-lysine degradation I	65.3543	61.4213	69.5652
PWY-7807	glyphosate degradation III	65.0919	57.868	72.8261
ARGDEG-PWY	superpathway of L-arginine, putrescine, and 4-aminobutanoate degradation	64.8294	61.4213	68.4783
ORNARGDEG-PWY	superpathway of L-arginine and L-ornithine degradation	64.8294	61.4213	68.4783
PWY0-1221	putrescine degradation II	64.5669	60.4061	69.0217
PWY-5692	allantoin degradation to glyoxylate II	64.042	58.8832	69.5652
PWY-7616	methanol oxidation to carbon dioxide	63.5171	58.8832	68.4783
PWY-7384	anaerobic energy metabolism (invertebrates, mitochondrial)	61.9423	55.8376	68.4783
PWY-5392	reductive TCA cycle II	60.6299	57.868	63.587
PWY-6143	CMP-pseudaminate biosynthesis	60.6299	55.8376	65.7609
PWY-8190	L-glutamate degradation XI (reductive Stickland reaction)	59.3176	51.269	67.9348
PWY-7389	superpathway of anaerobic energy metabolism (invertebrates)	59.0551	53.2995	65.2174
CARNMET-PWY	L-carnitine degradation I	58.7927	52.2843	65.7609
PWY-622	starch biosynthesis	58.2677	55.8376	60.8696
PWY-7688	dTDP-&alpha;-D-ravidosamine and dTDP-4-acetyl-&alpha;-D-ravidosamine biosynthesis	57.2178	58.3756	55.9783
RUMP-PWY	formaldehyde oxidation I	57.2178	56.3452	58.1522
PWY66-430	myristate biosynthesis (mitochondria)	56.4304	49.2386	64.1304
3-HYDROXYPHENYLACETATE-DEGRADATION-PWY	4-hydroxyphenylacetate degradation	56.168	47.7157	65.2174
PWY-7805	(aminomethyl)phosphonate degradation	56.168	50.2538	62.5
PWY-6328	L-lysine degradation X	55.3806	50.2538	60.8696
PWY-7874	L-threonate degradation	55.3806	48.731	62.5
LIPA-CORESYN-PWY	lipid A-core biosynthesis (E. coli K-12)	54.3307	51.269	57.6087
LPSSYN-PWY	superpathway of lipopolysaccharide biosynthesis	53.5433	49.7462	57.6087
PWY-5464	superpathway of cytosolic glycolysis (plants), pyruvate dehydrogenase and TCA cycle	53.5433	43.1472	64.6739
PWY-6876	isopropanol biosynthesis (engineered)	53.5433	50.2538	57.0652
PROTOCATECHUATE-ORTHO-CLEAVAGE-PWY	protocatechuate degradation II (ortho-cleavage pathway)	52.231	47.7157	57.0652
PWY-7371	1,4-dihydroxy-6-naphthoate biosynthesis II	52.231	52.7919	51.6304
PWY-7992	superpathway of menaquinol-8 biosynthesis III	52.231	52.7919	51.6304
PWY66-367	ketogenesis	50.6562	45.1777	56.5217
P125-PWY	superpathway of (R,R)-butanediol biosynthesis	50.1312	41.6244	59.2391
PWY-7196	superpathway of pyrimidine ribonucleosides salvage	49.3438	47.7157	51.087
PWY-5088	L-glutamate degradation VIII (to propanoate)	49.0814	41.6244	57.0652
PWY-6708	ubiquinol-8 biosynthesis (early decarboxylation)	49.0814	43.6548	54.8913
UBISYN-PWY	superpathway of ubiquinol-8 biosynthesis (early decarboxylation)	49.0814	43.6548	54.8913
PWY-7873	D-erythronate degradation II	48.8189	41.6244	56.5217
LIPASYN-PWY	phospholipases	45.4068	42.6396	48.3696
PWY-7820	teichuronic acid biosynthesis (B. subtilis 168)	43.832	40.1015	47.8261
PWY-822	fructan biosynthesis	43.3071	35.0254	52.1739
PWY-6562	norspermidine biosynthesis	42.7822	38.5787	47.2826
PWY0-321	phenylacetate degradation I (aerobic)	42.5197	36.5482	48.913
PWY-6071	superpathway of phenylethylamine degradation	42.5197	36.5482	48.913
CATECHOL-ORTHO-CLEAVAGE-PWY	catechol degradation to &beta;-ketoadipate	37.7953	31.9797	44.0217
AEROBACTINSYN-PWY	aerobactin biosynthesis	36.4829	35.533	37.5
PWY-5265	peptidoglycan biosynthesis II (staphylococci)	36.4829	32.4873	40.7609
PWY-5417	catechol degradation III (ortho-cleavage pathway)	35.6955	30.4569	41.3043
PWY-5431	aromatic compounds degradation via &beta;-ketoadipate	35.6955	30.4569	41.3043
PWY-5004	superpathway of L-citrulline metabolism	34.3832	31.9797	36.9565
PWY-6920	6-gingerol analog biosynthesis (engineered)	34.3832	31.9797	36.9565
PWY-6185	4-methylcatechol degradation (ortho cleavage)	34.1207	29.4416	39.1304
PWY-7434	terminal O-glycans residues modification (via type 2 precursor disaccharide)	33.5958	30.9645	36.413
PWY-7165	L-ascorbate biosynthesis VIII (engineered pathway)	33.3333	28.934	38.0435
PWY-101	photosynthesis light reactions	33.0709	38.5787	27.1739
URSIN-PWY	ureide biosynthesis	33.0709	29.4416	36.9565
PWY-7731	superpathway of photosynthetic hydrogen production	32.5459	37.5635	27.1739
DENITRIFICATION-PWY	nitrate reduction I (denitrification)	32.2835	35.0254	29.3478
PWY-7332	superpathway of UDP-N-acetylglucosamine-derived O-antigen building blocks biosynthesis	32.021	27.4112	36.9565
FASYN-INITIAL-PWY	superpathway of fatty acid biosynthesis initiation (E. coli)	31.2336	25.3807	37.5
PWY-6215	4-chlorobenzoate degradation	30.9711	26.9036	35.3261
PWY-6182	superpathway of salicylate degradation	29.9213	23.8579	36.413
PWY-7723	bacterial bioluminescence	29.6588	22.8426	36.9565
PWY-3801	sucrose degradation II (sucrose synthase)	29.3963	26.9036	32.0652
PWY-6953	dTDP-3-acetamido-&alpha;-D-fucose biosynthesis	28.084	26.9036	29.3478
PWY-3781	aerobic respiration I (cytochrome c)	27.8215	26.9036	28.8043
PWY-5994	palmitate biosynthesis (type I fatty acid synthase)	27.5591	24.3655	30.9783
PWY-7294	D-xylose degradation IV	27.5591	25.8883	29.3478
PWY-7396	butanol and isobutanol biosynthesis (engineered)	27.5591	24.3655	30.9783
PWY-6210	2-aminophenol degradation	27.2966	24.3655	30.4348
P621-PWY	nylon-6 oligomer degradation	26.7717	18.7817	35.3261
PWY-7200	superpathway of pyrimidine deoxyribonucleoside salvage	26.2467	25.8883	26.6304
PWY-7039	phosphatidate metabolism, as a signaling molecule	25.4593	22.335	28.8043
PWY-5910	superpathway of geranylgeranyldiphosphate biosynthesis I (via mevalonate)	24.6719	23.3503	26.087
PWY-922	mevalonate pathway I (eukaryotes and bacteria)	24.6719	23.3503	26.087
PWY-5654	2-amino-3-carboxymuconate semialdehyde degradation to 2-hydroxypentadienoate	21.7848	18.7817	25
PWY-7783	plasmalogen degradation	21.7848	22.8426	20.6522
PWY-7031	protein N-glycosylation (bacterial)	20.7349	16.7513	25
PWY-5415	catechol degradation I (meta-cleavage pathway)	20.4724	15.736	25.5435
PWY-5531	3,8-divinyl-chlorophyllide a biosynthesis II (anaerobic)	19.685	17.2589	22.2826
PWY1G-0	mycothiol biosynthesis	19.1601	19.797	18.4783
PWY66-388	ceramide degradation by &alpha;-oxidation	18.8976	16.7513	21.1957
PWY-5180	toluene degradation I (aerobic) (via o-cresol)	18.6352	13.7056	23.913
PHOTOALL-PWY	oxygenic photosynthesis	17.5853	19.797	15.2174
PWY-7159	3,8-divinyl-chlorophyllide a biosynthesis III (aerobic, light independent)	17.5853	16.2437	19.0217
PWY-7399	methylphosphonate degradation II	16.5354	9.64467	23.913
PWY-7218	photosynthetic 3-hydroxybutanoate biosynthesis (engineered)	14.6982	16.2437	13.0435
CRNFORCAT-PWY	creatinine degradation I	13.6483	11.6751	15.7609
P163-PWY	L-lysine fermentation to acetate and butanoate	12.5984	10.6599	14.6739
PWY-6518	bile acids epimerization	12.5984	6.59898	19.0217
DHGLUCONATE-PYR-CAT-PWY	glucose degradation (oxidative)	11.0236	10.1523	11.9565
PWY5F9-12	biphenyl degradation	11.0236	9.13706	13.0435
PWY-6471	peptidoglycan biosynthesis IV (Enterococcus faecium)	11.0236	8.12183	14.1304
PWY-5724	superpathway of atrazine degradation	10.4987	6.59898	14.6739
UDPNACETYLGALSYN-PWY	UDP-N-acetyl-D-glucosamine biosynthesis II	9.97375	8.62944	11.413
PWY-2221	Entner-Doudoroff pathway III (semi-phosphorylative)	9.44882	9.13706	9.78261
P562-PWY	myo-inositol degradation I	9.18635	7.1066	11.413
PWY-6396	superpathway of 2,3-butanediol biosynthesis	9.18635	5.58376	13.0435
PWY-6467	Kdo transfer to lipid IVA III (Chlamydia)	8.39895	6.59898	10.3261
PWY-7317	superpathway of dTDP-glucose-derived O-antigen building blocks biosynthesis	7.61155	6.09137	9.23913
PWY-5514	UDP-N-acetyl-D-galactosamine biosynthesis II	7.34908	4.56853	10.3261
PWY-7124	ethene biosynthesis V (engineered)	7.34908	8.62944	5.97826
PWY-6313	serotonin degradation	7.08661	5.07614	9.23913
PWY-7431	aromatic biogenic amine degradation (bacteria)	7.08661	5.07614	9.23913
PWY-7000	kanamycin biosynthesis	6.03675	4.56853	7.6087
PWY-5028	L-histidine degradation II	5.51181	6.59898	4.34783
PWY-1501	mandelate degradation I	5.24934	4.56853	5.97826
CHLOROPHYLL-SYN	3,8-divinyl-chlorophyllide a biosynthesis I (aerobic, light-dependent)	4.72441	5.58376	3.80435
12DICHLORETHDEG-PWY	1,2-dichloroethane degradation	4.19948	2.53807	5.97826
PWY-8134	bile acid 7&beta;-dehydroxylation	4.19948	4.06091	4.34783
PWY-6565	superpathway of polyamine biosynthesis III	3.67454	4.06091	3.26087
PWY-6641	superpathway of sulfolactate degradation	3.67454	2.53807	4.8913
PWY-7754	bile acid 7&alpha;-dehydroxylation	3.67454	3.5533	3.80435
TYRFUMCAT-PWY	L-tyrosine degradation I	3.41207	2.53807	4.34783
PWY-5055	nicotinate degradation III	3.14961	2.03046	4.34783
PWY-6138	CMP-N-acetylneuraminate biosynthesis I (eukaryotes)	3.14961	4.06091	2.17391
PWY-7290	Escherichia coli serotype O86 O-antigen biosynthesis	2.88714	1.52284	4.34783
P162-PWY	L-glutamate degradation V (via hydroxyglutarate)	2.62467	1.52284	3.80435
PWY-4361	S-methyl-5-thio-&alpha;-D-ribose 1-phosphate degradation I	2.09974	2.53807	1.63043
PWY-5178	toluene degradation IV (aerobic) (via catechol)	2.09974	1.01523	3.26087
PWY-6748	nitrate reduction VII (denitrification)	2.09974	2.03046	2.17391
PWY-7527	L-methionine salvage cycle III	1.83727	2.03046	1.63043
PWY-7374	1,4-dihydroxy-6-naphthoate biosynthesis I	1.5748	2.53807	0.543478
PWY-7391	isoprene biosynthesis II (engineered)	1.31234	0	2.71739
PWY-7528	L-methionine salvage cycle I (bacteria and plants)	1.31234	2.03046	0.543478
PWY-5198	factor 420 biosynthesis II (mycobacteria)	1.04987	0.507614	1.63043
PWY-6113	superpathway of mycolate biosynthesis	1.04987	0	2.17391
PWY-7286	7-(3-amino-3-carboxypropyl)-wyosine biosynthesis	1.04987	0.507614	1.63043
PWY-7511	protein ubiquitination	1.04987	1.01523	1.08696
PWY-8173	anteiso-branched-chain fatty acid biosynthesis	1.04987	0.507614	1.63043
PWY-8174	odd iso-branched-chain fatty acid biosynthesis	1.04987	0.507614	1.63043
PWY-8175	even iso-branched-chain fatty acid biosynthesis	1.04987	0.507614	1.63043
PWY-181	photorespiration	0.787402	1.01523	0.543478
PWY-2201	folate transformations I	0.787402	1.52284	0
PWY-5101	L-isoleucine biosynthesis II	0.787402	0.507614	1.08696
PWY-5209	methyl-coenzyme M oxidation to CO2	0.787402	0.507614	1.08696
PWY-5870	ubiquinol-8 biosynthesis (late decarboxylation)	0.787402	0.507614	1.08696
PWY-5873	ubiquinol-7 biosynthesis (late decarboxylation)	0.787402	1.52284	0
PWY-6349	CDP-archaeol biosynthesis	0.787402	0.507614	1.08696
PWY-7009	2,2'-dihydroxybiphenyl degradation	0.787402	0.507614	1.08696
PWY-7413	dTDP-6-deoxy-&alpha;-D-allose biosynthesis	0.787402	0	1.63043
PWY-8011	L-serine biosynthesis II	0.787402	1.01523	0.543478
ALL-CHORISMATE-PWY	superpathway of chorismate metabolism	0.524934	0	1.08696
GALLATE-DEGRADATION-I-PWY	gallate degradation II	0.524934	0.507614	0.543478
METHANOGENESIS-PWY	methanogenesis from H2 and CO2	0.524934	0.507614	0.543478
METHYLGALLATE-DEGRADATION-PWY	methylgallate degradation	0.524934	0.507614	0.543478
PWY-1622	formaldehyde assimilation I (serine pathway)	0.524934	0.507614	0.543478
PWY-5419	catechol degradation to 2-hydroxypentadienoate II	0.524934	0	1.08696
PWY-5420	catechol degradation II (meta-cleavage pathway)	0.524934	0	1.08696
PWY-5647	2-nitrobenzoate degradation I	0.524934	0.507614	0.543478
PWY-6350	archaetidylinositol biosynthesis	0.524934	0.507614	0.543478
PWY-6797	6-hydroxymethyl-dihydropterin diphosphate biosynthesis II (Methanocaldococcus)	0.524934	0	1.08696
PWY-6957	mandelate degradation to acetyl-CoA	0.524934	0	1.08696
PWY-7090	UDP-2,3-diacetamido-2,3-dideoxy-&alpha;-D-mannuronate biosynthesis	0.524934	0	1.08696
PWY-7905	Escherichia coli serotype O9a O-antigen biosynthesis	0.524934	0.507614	0.543478
PWY-8113	3PG-factor 420 biosynthesis	0.524934	0.507614	0.543478
GALLATE-DEGRADATION-II-PWY	gallate degradation I	0.262467	0.507614	0
M-CRESOL-DEGRADATION-PWY	m-cresol degradation	0.262467	0	0.543478
NADSYN-PWY	NAD de novo biosynthesis II (from tryptophan)	0.262467	0	0.543478
P241-PWY	coenzyme B biosynthesis	0.262467	0	0.543478
PWY-1361	benzoyl-CoA degradation I (aerobic)	0.262467	0	0.543478
PWY-1541	superpathway of taurine degradation	0.262467	0.507614	0
PWY-3661	glycine betaine degradation I	0.262467	0	0.543478
PWY-3941	&beta;-alanine biosynthesis II	0.262467	0	0.543478
PWY-4702	phytate degradation I	0.262467	0	0.543478
PWY-5079	L-phenylalanine degradation III	0.262467	0	0.543478
PWY-5109	propanoate fermentation to 2-methylbutanoate	0.262467	0	0.543478
PWY-5430	meta cleavage pathway of aromatic compounds	0.262467	0	0.543478
PWY-5517	L-arabinose degradation III	0.262467	0	0.543478
PWY-5651	L-tryptophan degradation to 2-amino-3-carboxymuconate semialdehyde	0.262467	0	0.543478
PWY-5742	L-arginine degradation IX (arginine: pyruvate transaminase pathway)	0.262467	0	0.543478
PWY-6060	malonate degradation II (biotin-dependent)	0.262467	0	0.543478
PWY-6486	D-galacturonate degradation II	0.262467	0	0.543478
PWY-6501	D-glucuronate degradation II	0.262467	0	0.543478
PWY-6596	adenosine nucleotides degradation I	0.262467	0	0.543478
PWY-6662	superpathway of quinolone and alkylquinolone biosynthesis	0.262467	0.507614	0
PWY-6724	starch degradation II	0.262467	0.507614	0
PWY-6837	fatty acid &beta;-oxidation V (unsaturated, odd number, di-isomerase-dependent)	0.262467	0	0.543478
PWY-6891	thiazole component of thiamine diphosphate biosynthesis II	0.262467	0	0.543478
PWY-7295	L-arabinose degradation IV	0.262467	0	0.543478
PWY-7373	superpathway of demethylmenaquinol-6 biosynthesis II	0.262467	0	0.543478
PWY-7376	cob(II)yrinate a,c-diamide biosynthesis II (late cobalt incorporation)	0.262467	0	0.543478
PWY-7397	naringenin biosynthesis (engineered)	0.262467	0	0.543478
PWY-7480	2,3-dihydroxybenzoate degradation	0.262467	0	0.543478
PWY-7854	crotonyl-CoA/ethylmalonyl-CoA/hydroxybutyryl-CoA cycle (engineered)	0.262467	0	0.543478
PWY-8091	D-apionate degradation I (xylose isomerase family decarboxylase)	0.262467	0.507614	0

## Sheet: Table S7
Table S7. Average relative abundance of differential bacterial composition of PWY-7111
species	WH	SY
s__Bifidobacterium_longum	8.66612e-07	3.35932e-07
s__Clostridium_bolteae	1.29085e-06	8.00783e-07
s__Clostridium_symbiosum	2.69938e-07	5.87377e-08
s__Dorea_longicatena	9.06107e-07	5.82836e-07
s__Erysipelatoclostridium_ramosum	3.54254e-07	1.36816e-07
s__Escherichia_coli	3.18211e-05	2.19177e-05
s__Flavonifractor_plautii	2.61506e-06	1.20883e-06
s__Klebsiella_quasipneumoniae	6.87838e-07	7.22111e-08
s__Phascolarctobacterium_succinatutens	2.40467e-07	3.42664e-07
s__Prevotella_copri	7.72121e-07	7.27029e-07
s__Roseburia_faecis	6.66655e-06	8.67955e-06
s__Ruminococcus_gnavus	2.24784e-06	1.73891e-06
s__Ruminococcus_torques	3.21956e-06	2.04328e-06
s__Streptococcus_salivarius	9.38372e-07	2.77524e-07
PWY-7111	0.000296171	0.00025297

## Sheet: Table S8
Table S8. The relationships between differential bacteria and dissimilar functions of Shiyan
Species	Pathway	r	p	linecolor	linesize
Ruminococcus_bicirculans	ASPASN-PWY	-0.3921	1.78e-07	negative	0.3921
Prevotella_copri	ASPASN-PWY	0.392306	1.78e-07	positive	0.392306
Prevotella_copri	DTDPRHAMSYN-PWY	0.373693	6.4e-07	positive	0.373693
Klebsiella_quasipneumoniae	DTDPRHAMSYN-PWY	-0.333993	1.08e-05	negative	0.333993
Escherichia_coli	DTDPRHAMSYN-PWY	-0.514849	4.07e-13	negative	0.514849
Klebsiella_quasipneumoniae	HISTSYN-PWY	-0.385544	2.89e-07	negative	0.385544
Escherichia_coli	HISTSYN-PWY	-0.656132	8.69e-23	negative	0.656132
Ruminococcus_gnavus	HISTSYN-PWY	-0.307532	6.19e-05	negative	0.307532
Prevotella_copri	PEPTIDOGLYCANSYN-PWY	0.40445	7.52e-08	positive	0.40445
Erysipelatoclostridium_ramosum	PEPTIDOGLYCANSYN-PWY	-0.383807	3.16e-07	negative	0.383807
Bacteroides_plebeius	PEPTIDOGLYCANSYN-PWY	0.385425	2.89e-07	positive	0.385425
Klebsiella_quasipneumoniae	PEPTIDOGLYCANSYN-PWY	-0.382454	3.23e-07	negative	0.382454
Escherichia_coli	PEPTIDOGLYCANSYN-PWY	-0.584387	1.05e-17	negative	0.584387
Ruminococcus_gnavus	PEPTIDOGLYCANSYN-PWY	-0.377266	4.96e-07	negative	0.377266
Flavonifractor_plautii	PEPTIDOGLYCANSYN-PWY	-0.354647	2.35e-06	negative	0.354647
Prevotella_copri	PWY-1042	0.468247	1.38e-10	positive	0.468247
Escherichia_coli	PWY-1042	-0.482962	2.42e-11	negative	0.482962
Streptococcus_salivarius	PWY-2942	-0.329083	1.47e-05	negative	0.329083
Bifidobacterium_longum	PWY-2942	-0.327683	1.6e-05	negative	0.327683
Bacteroides_plebeius	PWY-2942	0.372522	6.88e-07	positive	0.372522
Klebsiella_quasipneumoniae	PWY-2942	-0.440485	2.6e-09	negative	0.440485
Escherichia_coli	PWY-2942	-0.511229	6.33e-13	negative	0.511229
Prevotella_copri	PWY-5097	0.350692	3.13e-06	positive	0.350692
Erysipelatoclostridium_ramosum	PWY-5097	-0.318081	3.09e-05	negative	0.318081
Bacteroides_plebeius	PWY-5097	0.405504	7.16e-08	positive	0.405504
Klebsiella_quasipneumoniae	PWY-5097	-0.411297	4.47e-08	negative	0.411297
Escherichia_coli	PWY-5097	-0.593375	2.32e-18	negative	0.593375
Ruminococcus_gnavus	PWY-5097	-0.337023	8.74e-06	negative	0.337023
Prevotella_copri	PWY-5686	0.357884	1.94e-06	positive	0.357884
Erysipelatoclostridium_ramosum	PWY-5686	-0.391956	1.78e-07	negative	0.391956
Bacteroides_plebeius	PWY-5686	0.356379	2.13e-06	positive	0.356379
Klebsiella_quasipneumoniae	PWY-5686	-0.369744	8.4e-07	negative	0.369744
Escherichia_coli	PWY-5686	-0.635337	2e-21	negative	0.635337
Ruminococcus_gnavus	PWY-5686	-0.44689	1.34e-09	negative	0.44689
Flavonifractor_plautii	PWY-5686	-0.355047	2.29e-06	negative	0.355047
Clostridium_bolteae	PWY-5686	-0.329736	1.42e-05	negative	0.329736
Prevotella_copri	PWY-6122	0.365574	1.11e-06	positive	0.365574
Erysipelatoclostridium_ramosum	PWY-6122	-0.385182	2.89e-07	negative	0.385182
Bacteroides_plebeius	PWY-6122	0.322391	2.28e-05	positive	0.322391
Klebsiella_quasipneumoniae	PWY-6122	-0.393018	1.78e-07	negative	0.393018
Escherichia_coli	PWY-6122	-0.609905	1.62e-19	negative	0.609905
Flavonifractor_plautii	PWY-6122	-0.313558	4.2e-05	negative	0.313558
Ruminococcus_bicirculans	PWY-6147	-0.353926	2.46e-06	negative	0.353926
Prevotella_copri	PWY-6151	0.323338	2.17e-05	positive	0.323338
Erysipelatoclostridium_ramosum	PWY-6151	-0.341748	6.18e-06	negative	0.341748
Klebsiella_quasipneumoniae	PWY-6151	-0.308069	6.01e-05	negative	0.308069
Escherichia_coli	PWY-6151	-0.610389	1.62e-19	negative	0.610389
Ruminococcus_gnavus	PWY-6151	-0.341346	6.32e-06	negative	0.341346
Flavonifractor_plautii	PWY-6151	-0.367906	9.33e-07	negative	0.367906
Clostridium_bolteae	PWY-6151	-0.346418	4.37e-06	negative	0.346418
Prevotella_copri	PWY-6277	0.365574	1.11e-06	positive	0.365574
Erysipelatoclostridium_ramosum	PWY-6277	-0.385182	2.89e-07	negative	0.385182
Bacteroides_plebeius	PWY-6277	0.322391	2.28e-05	positive	0.322391
Klebsiella_quasipneumoniae	PWY-6277	-0.393018	1.78e-07	negative	0.393018
Escherichia_coli	PWY-6277	-0.609905	1.62e-19	negative	0.609905
Flavonifractor_plautii	PWY-6277	-0.313558	4.2e-05	negative	0.313558
Prevotella_copri	PWY-6385	0.384338	3.06e-07	positive	0.384338
Erysipelatoclostridium_ramosum	PWY-6385	-0.373142	6.62e-07	negative	0.373142
Bacteroides_plebeius	PWY-6385	0.394715	1.65e-07	positive	0.394715
Klebsiella_quasipneumoniae	PWY-6385	-0.400978	9.62e-08	negative	0.400978
Escherichia_coli	PWY-6385	-0.578042	2.93e-17	negative	0.578042
Ruminococcus_gnavus	PWY-6385	-0.363111	1.32e-06	negative	0.363111
Flavonifractor_plautii	PWY-6385	-0.343614	5.39e-06	negative	0.343614
Prevotella_copri	PWY-6386	0.41663	3.03e-08	positive	0.41663
Erysipelatoclostridium_ramosum	PWY-6386	-0.406001	7.04e-08	negative	0.406001
Bacteroides_plebeius	PWY-6386	0.385791	2.89e-07	positive	0.385791
Klebsiella_quasipneumoniae	PWY-6386	-0.382971	3.18e-07	negative	0.382971
Escherichia_coli	PWY-6386	-0.601527	6.26e-19	negative	0.601527
Ruminococcus_gnavus	PWY-6386	-0.415735	3.19e-08	negative	0.415735
Flavonifractor_plautii	PWY-6386	-0.368136	9.26e-07	negative	0.368136
Clostridium_bolteae	PWY-6386	-0.323726	2.12e-05	negative	0.323726
Prevotella_copri	PWY-6387	0.412182	4.23e-08	positive	0.412182
Erysipelatoclostridium_ramosum	PWY-6387	-0.39906	1.12e-07	negative	0.39906
Bacteroides_plebeius	PWY-6387	0.38559	2.89e-07	positive	0.38559
Klebsiella_quasipneumoniae	PWY-6387	-0.382519	3.23e-07	negative	0.382519
Escherichia_coli	PWY-6387	-0.596018	1.57e-18	negative	0.596018
Ruminococcus_gnavus	PWY-6387	-0.400975	9.62e-08	negative	0.400975
Flavonifractor_plautii	PWY-6387	-0.368741	8.91e-07	negative	0.368741
Clostridium_bolteae	PWY-6387	-0.312028	4.64e-05	negative	0.312028
Prevotella_copri	PWY-6700	0.328778	1.49e-05	positive	0.328778
Erysipelatoclostridium_ramosum	PWY-6700	-0.390965	1.91e-07	negative	0.390965
Bacteroides_plebeius	PWY-6700	0.373725	6.4e-07	positive	0.373725
Klebsiella_quasipneumoniae	PWY-6700	-0.402456	8.81e-08	negative	0.402456
Escherichia_coli	PWY-6700	-0.617472	5.99e-20	negative	0.617472
Ruminococcus_gnavus	PWY-6700	-0.381499	3.46e-07	negative	0.381499
Flavonifractor_plautii	PWY-6700	-0.352619	2.71e-06	negative	0.352619
Prevotella_copri	PWY-6897	0.364328	1.22e-06	positive	0.364328
Erysipelatoclostridium_ramosum	PWY-6897	-0.33571	9.57e-06	negative	0.33571
Escherichia_coli	PWY-6897	-0.569681	1.05e-16	negative	0.569681
Ruminococcus_gnavus	PWY-6897	-0.38298	3.18e-07	negative	0.38298
Escherichia_coli	PWY-7111	0.331918	1.24e-05	positive	0.331918
Roseburia_faecis	PWY-7111	0.308952	5.7e-05	positive	0.308952
Prevotella_copri	PWY-7221	0.412844	4.11e-08	positive	0.412844
Erysipelatoclostridium_ramosum	PWY-7221	-0.329062	1.47e-05	negative	0.329062
Bacteroides_plebeius	PWY-7221	0.307123	6.32e-05	positive	0.307123
Klebsiella_quasipneumoniae	PWY-7221	-0.404389	7.52e-08	negative	0.404389
Escherichia_coli	PWY-7221	-0.60157	6.26e-19	negative	0.60157
Ruminococcus_gnavus	PWY-7221	-0.361005	1.55e-06	negative	0.361005
Prevotella_copri	PWY-7790	0.357884	1.94e-06	positive	0.357884
Erysipelatoclostridium_ramosum	PWY-7790	-0.391956	1.78e-07	negative	0.391956
Bacteroides_plebeius	PWY-7790	0.356379	2.13e-06	positive	0.356379
Klebsiella_quasipneumoniae	PWY-7790	-0.369744	8.4e-07	negative	0.369744
Escherichia_coli	PWY-7790	-0.635337	2e-21	negative	0.635337
Ruminococcus_gnavus	PWY-7790	-0.44689	1.34e-09	negative	0.44689
Flavonifractor_plautii	PWY-7790	-0.355047	2.29e-06	negative	0.355047
Clostridium_bolteae	PWY-7790	-0.329736	1.42e-05	negative	0.329736
Prevotella_copri	PWY-7791	0.357884	1.94e-06	positive	0.357884
Erysipelatoclostridium_ramosum	PWY-7791	-0.391956	1.78e-07	negative	0.391956
Bacteroides_plebeius	PWY-7791	0.356379	2.13e-06	positive	0.356379
Klebsiella_quasipneumoniae	PWY-7791	-0.369744	8.4e-07	negative	0.369744
Escherichia_coli	PWY-7791	-0.635337	2e-21	negative	0.635337
Ruminococcus_gnavus	PWY-7791	-0.44689	1.34e-09	negative	0.44689
Flavonifractor_plautii	PWY-7791	-0.355047	2.29e-06	negative	0.355047
Clostridium_bolteae	PWY-7791	-0.329736	1.42e-05	negative	0.329736
Prevotella_copri	PWY-7953	0.383364	3.18e-07	positive	0.383364
Erysipelatoclostridium_ramosum	PWY-7953	-0.369524	8.44e-07	negative	0.369524
Bacteroides_plebeius	PWY-7953	0.407373	6.36e-08	positive	0.407373
Klebsiella_quasipneumoniae	PWY-7953	-0.392776	1.78e-07	negative	0.392776
Escherichia_coli	PWY-7953	-0.570786	9.31e-17	negative	0.570786
Ruminococcus_gnavus	PWY-7953	-0.37656	5.2e-07	negative	0.37656
Flavonifractor_plautii	PWY-7953	-0.33376	1.09e-05	negative	0.33376
Prevotella_copri	PWY-7977	0.363491	1.29e-06	positive	0.363491
Bifidobacterium_longum	PWY-7977	-0.305585	6.97e-05	negative	0.305585
Klebsiella_quasipneumoniae	PWY-7977	-0.383065	3.18e-07	negative	0.383065
Escherichia_coli	PWY-7977	-0.461628	2.86e-10	negative	0.461628
Ruminococcus_bicirculans	PWY0-1586	-0.374319	6.24e-07	negative	0.374319

## Sheet: Table S9
Table S9. The relationships between differential bacteria and dissimilar functions of Wuhan
Species	Pathway	r	p	linecolor	linesize
Klebsiella_quasipneumoniae	DTDPRHAMSYN-PWY	-0.319458	0.000154355	negative	0.319458
Escherichia_coli	DTDPRHAMSYN-PWY	-0.45633	2.70365e-09	negative	0.45633
Escherichia_coli	HISTSYN-PWY	-0.659545	4.37298e-22	negative	0.659545
Prevotella_copri	PEPTIDOGLYCANSYN-PWY	0.323043	0.000126443	positive	0.323043
Erysipelatoclostridium_ramosum	PEPTIDOGLYCANSYN-PWY	-0.414408	1.32611e-07	negative	0.414408
Escherichia_coli	PEPTIDOGLYCANSYN-PWY	-0.632263	3.73996e-20	negative	0.632263
Ruminococcus_gnavus	PEPTIDOGLYCANSYN-PWY	-0.321049	0.000141651	negative	0.321049
Prevotella_copri	PWY-1042	0.32862	9.45773e-05	positive	0.32862
Escherichia_coli	PWY-1042	-0.518641	1.85962e-12	negative	0.518641
Escherichia_coli	PWY-2942	-0.555148	1.22318e-14	negative	0.555148
Erysipelatoclostridium_ramosum	PWY-5097	-0.339944	4.5631e-05	negative	0.339944
Bacteroides_plebeius	PWY-5097	0.303284	0.000342352	positive	0.303284
Escherichia_coli	PWY-5097	-0.62544	1.17906e-19	negative	0.62544
Prevotella_copri	PWY-5686	0.306209	0.000293584	positive	0.306209
Erysipelatoclostridium_ramosum	PWY-5686	-0.436542	1.75085e-08	negative	0.436542
Escherichia_coli	PWY-5686	-0.685274	1.78626e-24	negative	0.685274
Ruminococcus_gnavus	PWY-5686	-0.385906	1.3747e-06	negative	0.385906
Roseburia_faecis	PWY-5686	0.312602	0.000220062	positive	0.312602
Erysipelatoclostridium_ramosum	PWY-6122	-0.32694	0.000101253	negative	0.32694
Escherichia_coli	PWY-6122	-0.63497	2.44852e-20	negative	0.63497
Ruminococcus_bicirculans	PWY-6147	-0.334572	6.37307e-05	negative	0.334572
Roseburia_faecis	PWY-6147	-0.310575	0.000241939	negative	0.310575
Erysipelatoclostridium_ramosum	PWY-6151	-0.394653	7.36008e-07	negative	0.394653
Escherichia_coli	PWY-6151	-0.610445	1.61745e-18	negative	0.610445
Erysipelatoclostridium_ramosum	PWY-6277	-0.32694	0.000101253	negative	0.32694
Escherichia_coli	PWY-6277	-0.63497	2.44852e-20	negative	0.63497
Erysipelatoclostridium_ramosum	PWY-6385	-0.387651	1.30321e-06	negative	0.387651
Escherichia_coli	PWY-6385	-0.623431	1.60502e-19	negative	0.623431
Ruminococcus_gnavus	PWY-6385	-0.314256	0.00020958	negative	0.314256
Prevotella_copri	PWY-6386	0.308052	0.000279906	positive	0.308052
Erysipelatoclostridium_ramosum	PWY-6386	-0.420273	8.24099e-08	negative	0.420273
Escherichia_coli	PWY-6386	-0.652856	1.43703e-21	negative	0.652856
Ruminococcus_gnavus	PWY-6386	-0.354221	1.61928e-05	negative	0.354221
Clostridium_bolteae	PWY-6386	-0.306383	0.000293584	negative	0.306383
Prevotella_copri	PWY-6387	0.314406	0.00020958	positive	0.314406
Erysipelatoclostridium_ramosum	PWY-6387	-0.417549	1.02562e-07	negative	0.417549
Escherichia_coli	PWY-6387	-0.646565	4.38045e-21	negative	0.646565
Ruminococcus_gnavus	PWY-6387	-0.339541	4.57511e-05	negative	0.339541
Erysipelatoclostridium_ramosum	PWY-6700	-0.357047	1.38036e-05	negative	0.357047
Escherichia_coli	PWY-6700	-0.634893	2.44852e-20	negative	0.634893
Klebsiella_quasipneumoniae	PWY-6897	-0.302961	0.000343739	negative	0.302961
Escherichia_coli	PWY-6897	-0.634954	2.44852e-20	negative	0.634954
Escherichia_coli	PWY-7111	0.437081	1.75085e-08	positive	0.437081
Prevotella_copri	PWY-7221	0.305126	0.000309445	positive	0.305126
Erysipelatoclostridium_ramosum	PWY-7221	-0.311729	0.000228603	negative	0.311729
Escherichia_coli	PWY-7221	-0.635898	2.44852e-20	negative	0.635898
Prevotella_copri	PWY-7790	0.306209	0.000293584	positive	0.306209
Erysipelatoclostridium_ramosum	PWY-7790	-0.436542	1.75085e-08	negative	0.436542
Escherichia_coli	PWY-7790	-0.685274	1.78626e-24	negative	0.685274
Ruminococcus_gnavus	PWY-7790	-0.385906	1.3747e-06	negative	0.385906
Roseburia_faecis	PWY-7790	0.312602	0.000220062	positive	0.312602
Prevotella_copri	PWY-7791	0.306209	0.000293584	positive	0.306209
Erysipelatoclostridium_ramosum	PWY-7791	-0.436542	1.75085e-08	negative	0.436542
Escherichia_coli	PWY-7791	-0.685274	1.78626e-24	negative	0.685274
Ruminococcus_gnavus	PWY-7791	-0.385906	1.3747e-06	negative	0.385906
Roseburia_faecis	PWY-7791	0.312602	0.000220062	positive	0.312602
Erysipelatoclostridium_ramosum	PWY-7953	-0.413322	1.41488e-07	negative	0.413322
Escherichia_coli	PWY-7953	-0.628464	7.15708e-20	negative	0.628464
Ruminococcus_gnavus	PWY-7953	-0.326404	0.000102641	negative	0.326404
Escherichia_coli	PWY-7977	-0.48939	6.80624e-11	negative	0.48939
Roseburia_faecis	PWY0-1586	-0.35456	1.61928e-05	negative	0.35456

## Sheet: Table S10
Table S10. Region-specific bacteria based on MaAslin2
bacteria	class	coef	stderr	N	N.not.0	pval	qval
Pseudomonas_aeruginosa_group	species	-1.05181	0.171211	381	38	2.04475e-09	5.47993e-07
Collinsella_massiliensis	species	0.894993	0.204429	381	147	1.55129e-05	0.00207873
Bacteroides_stercoris	species	2.57217	0.657746	381	327	0.00010909	0.00604571
Clostridium_bolteae_CAG_59	species	1.57144	0.396723	381	169	8.91534e-05	0.00604571
Blautia_sp_CAG_257	species	1.52826	0.391643	381	100	0.000112793	0.00604571
Collinsella_stercoris	species	1.29421	0.338111	381	208	0.000151233	0.00612709
Flavonifractor_plautii	species	1.07481	0.28186	381	375	0.000160036	0.00612709
Lactococcus_lactis	species	0.610101	0.168853	381	29	0.000343185	0.0114967
Clostridium_symbiosum	species	1.52218	0.434847	381	211	0.000519679	0.0119742
Ruthenibacterium_lactatiformans	species	1.60897	0.45735	381	304	0.000487545	0.0119742
Citrobacter_freundii	species	0.780096	0.223402	381	67	0.000536159	0.0119742
Citrobacter_youngae	species	0.835059	0.238079	381	75	0.000506644	0.0119742
Rothia_mucilaginosa	species	-1.21839	0.380295	381	139	0.00147109	0.0282719
Clostridium_lavalense	species	1.26605	0.395316	381	138	0.00147689	0.0282719
Clostridium_bolteae	species	1.19409	0.378008	381	345	0.0017107	0.0305645
Gordonibacter_pamelaeae	species	1.23273	0.398154	381	263	0.00210662	0.0326279
Lactobacillus_rogosae	species	-1.10719	0.355332	381	119	0.00197334	0.0326279
Clostridium_sp_CAG_58	species	1.40916	0.464031	381	145	0.00255667	0.0326279
Blautia_hansenii	species	1.41198	0.460269	381	110	0.00231197	0.0326279
Citrobacter_portucalensis	species	0.59012	0.193562	381	54	0.00245938	0.0326279
Escherichia_coli	species	1.27419	0.418966	381	358	0.00251969	0.0326279
Clostridium_sp_CAG_299	species	1.21859	0.417873	381	128	0.00375414	0.0437439
Clostridium_innocuum	species	1.30688	0.446223	381	193	0.00360884	0.0437439
Phascolarctobacterium_faecium	species	1.52837	0.529717	381	300	0.00413458	0.0461695
Pseudomonas	species	-1.07458	0.172066	381	39	1.13711e-09	1.26219e-07
Clostridium	species	2.33216	0.439368	381	320	1.89147e-07	1.04977e-05
Citrobacter	species	1.35253	0.327415	381	103	4.44858e-05	0.00164597
Lactococcus	species	0.926161	0.231088	381	38	7.37959e-05	0.00204784
Blautia	species	0.709951	0.183511	381	381	0.00012877	0.0028437
Flavonifractor	species	1.0775	0.281802	381	375	0.000153714	0.0028437
Ruthenibacterium	species	1.60897	0.45735	381	304	0.000487545	0.00773106
Rothia	species	-1.23662	0.381756	381	139	0.00130405	0.0180937
Gordonibacter	species	1.23273	0.398154	381	263	0.00210662	0.0245204
Erysipelatoclostridium	species	1.57789	0.51203	381	249	0.00220905	0.0245204
Streptococcus	species	0.869796	0.287766	381	370	0.00267667	0.0247592
Escherichia	species	1.27584	0.419099	381	358	0.00249553	0.0247592
Lachnospira	species	-2.17361	0.769492	381	232	0.00498217	0.0425401
GOLPDLCAT-PWY	pathway	0.705874	0.121809	381	381	1.43901e-08	5.5321e-06
PWY66-409	pathway	0.582498	0.102362	381	381	2.53766e-08	5.5321e-06
PWY0-1477	pathway	0.757567	0.14283	381	381	1.93049e-07	2.80565e-05
PWY-5676	pathway	0.617309	0.119399	381	381	3.79488e-07	3.76733e-05
PWY-7013	pathway	0.989247	0.192876	381	371	4.65974e-07	3.76733e-05
PWY0-1297	pathway	0.675544	0.132268	381	381	5.1844e-07	3.76733e-05
PWY-7328	pathway	0.342812	0.0676416	381	381	6.29504e-07	3.92091e-05
P161-PWY	pathway	0.85278	0.177211	381	381	2.15882e-06	0.000111985
PWY-7111	pathway	0.266407	0.0555278	381	381	2.31162e-06	0.000111985
PWY4LZ-257	pathway	0.771477	0.162346	381	381	2.86323e-06	0.000124837
PWY-5464	pathway	1.17746	0.258145	381	204	6.87633e-06	0.000272553
OANTIGEN-PWY	pathway	0.214663	0.0486836	381	381	1.35235e-05	0.000453559
P125-PWY	pathway	1.17957	0.266735	381	191	1.27788e-05	0.000453559
P441-PWY	pathway	0.488409	0.113407	381	381	2.11328e-05	0.000642541
PWY-8190	pathway	1.10758	0.257802	381	226	2.21058e-05	0.000642541
PWY-5005	pathway	0.722219	0.170019	381	375	2.71901e-05	0.000727022
PWY-5104	pathway	1.28328	0.302798	381	314	2.83472e-05	0.000727022
UDPNAGSYN-PWY	pathway	0.267703	0.0641545	381	381	3.73467e-05	0.000904619
PWY-6549	pathway	0.43696	0.105689	381	381	4.38519e-05	0.00100628
GALACT-GLUCUROCAT-PWY	pathway	0.314004	0.0775748	381	381	6.27103e-05	0.00118877
PWY-5022	pathway	0.96014	0.237076	381	362	6.21553e-05	0.00118877
PWY3O-4107	pathway	1.06301	0.262063	381	355	6.05503e-05	0.00118877
PYRIDNUCSAL-PWY	pathway	1.01339	0.250014	381	355	6.12934e-05	0.00118877
PWY-5367	pathway	1.06494	0.26795	381	345	8.44827e-05	0.00131552
PWY-6628	pathway	0.265834	0.0668016	381	381	8.27782e-05	0.00131552
PWY-7115	pathway	0.702499	0.176458	381	374	8.22273e-05	0.00131552
PWY-8004	pathway	0.27333	0.0685363	381	381	7.99355e-05	0.00131552
PWY0-42	pathway	1.55509	0.387854	381	306	7.33024e-05	0.00131552
X3-HYDROXYPHENYLACETATE-DEGRADATION-PWY	pathway	1.13537	0.290426	381	214	0.000109642	0.0016484
PWY-5981	pathway	1.02158	0.265362	381	348	0.000138734	0.00201627
ECASYN-PWY	pathway	1.30983	0.34798	381	295	0.000193657	0.0020792
GALACTUROCAT-PWY	pathway	0.284661	0.0758015	381	381	0.00020029	0.0020792
GLUCARDEG-PWY	pathway	0.711653	0.186758	381	379	0.00016173	0.0020792
LACTOSECAT-PWY	pathway	0.617731	0.162562	381	376	0.000168537	0.0020792
P164-PWY	pathway	0.377389	0.100266	381	379	0.000193818	0.0020792
PWY-241	pathway	0.795519	0.210541	381	374	0.000183205	0.0020792
PWY-5747	pathway	1.36623	0.357351	381	285	0.000153947	0.0020792
PWY-6284	pathway	0.974906	0.258189	381	345	0.000184989	0.0020792
PWY-6470	pathway	0.525517	0.138905	381	378	0.000179805	0.0020792
PWY-7117	pathway	0.794318	0.210202	381	374	0.000182931	0.0020792
PWY-7198	pathway	0.46282	0.123225	381	381	0.000199878	0.0020792
PWY-822	pathway	0.845359	0.223236	381	165	0.000177353	0.0020792
PWY-5840	pathway	0.698897	0.186862	381	362	0.000212306	0.00215269
PWY-7399	pathway	0.441617	0.119113	381	63	0.000240507	0.0023832
THREOCAT-PWY	pathway	1.21383	0.332549	381	256	0.000298937	0.00289637
GLCMANNANAUT-PWY	pathway	0.234458	0.0649106	381	381	0.000344725	0.00326739
PWY-6518	pathway	0.405182	0.112448	381	48	0.000356141	0.00330378
PWY-6588	pathway	0.555476	0.154724	381	379	0.000373967	0.00339687
PWY-2942	pathway	-0.112935	0.0315099	381	381	0.000382378	0.00340239
PWY-7977	pathway	-0.112735	0.0315177	381	381	0.000392759	0.00342486
PWY-5497	pathway	0.351254	0.0991989	381	380	0.000448395	0.00375962
PWY-5913	pathway	0.740851	0.209132	381	375	0.000445776	0.00375962
SALVADEHYPOX-PWY	pathway	0.42858	0.121275	381	380	0.000459991	0.00378408
GALACTARDEG-PWY	pathway	0.675394	0.192709	381	379	0.000511733	0.00385128
GLUCARGALACTSUPER-PWY	pathway	0.675394	0.192709	381	379	0.000511733	0.00385128
P621-PWY	pathway	0.739228	0.210486	381	102	0.000498366	0.00385128
PWY-7118	pathway	1.0223	0.291718	381	347	0.000512326	0.00385128
PWY0-301	pathway	1.16719	0.331326	381	339	0.000479167	0.00385128
GLUCONEO-PWY	pathway	0.209565	0.0599061	381	381	0.000523989	0.00387219
PWY-5138	pathway	0.959486	0.27677	381	328	0.00058724	0.00426728
FOLSYN-PWY	pathway	0.576651	0.167158	381	376	0.000624238	0.00446177
GLYCOLYSIS-E-D	pathway	0.237081	0.0691808	381	381	0.000677253	0.00472896
PWY-6612	pathway	0.582336	0.170051	381	376	0.000683312	0.00472896
PWY-5918	pathway	0.757846	0.22201	381	367	0.000710395	0.00483957
PWY0-1337	pathway	1.16885	0.344768	381	300	0.00077171	0.0051764
PWY-5920	pathway	1.05494	0.312278	381	323	0.000805241	0.0052841
PWY-7197	pathway	0.18422	0.05457	381	381	0.000812007	0.0052841
ARG-POLYAMINE-SYN	pathway	0.325317	0.0966876	381	381	0.000844772	0.00541648
PWY-6353	pathway	0.296985	0.0889681	381	380	0.000927054	0.00578483
PWY-6507	pathway	0.270076	0.0810182	381	381	0.000942024	0.00578483
PWY-6897	pathway	-0.139676	0.0418684	381	381	0.000933696	0.00578483
PWY-6961	pathway	1.04909	0.316202	381	338	0.000995158	0.00594368
PWY-7094	pathway	1.13431	0.341526	381	307	0.000982979	0.00594368
GLUDEG-I-PWY	pathway	0.836634	0.25309	381	365	0.00103787	0.006115
GLYCOLYSIS-TCA-GLYOX-BYPASS	pathway	1.08867	0.330421	381	280	0.00107773	0.00618277
PWY-561	pathway	0.936304	0.284068	381	332	0.00107304	0.00618277
ARGDEG-PWY	pathway	1.03252	0.319132	381	247	0.00132152	0.0069294
DAPLYSINESYN-PWY	pathway	0.473991	0.146084	381	380	0.0012804	0.0069294
FAO-PWY	pathway	0.911211	0.282202	381	330	0.00135092	0.0069294
ORNARGDEG-PWY	pathway	1.03252	0.319132	381	247	0.00132152	0.0069294
PWY-5855	pathway	1.00762	0.311934	381	309	0.00134493	0.0069294
PWY-7616	pathway	0.972856	0.299953	381	242	0.00128607	0.0069294
PWY0-1061	pathway	0.662798	0.205013	381	375	0.00133256	0.0069294
PWY0-1338	pathway	1.00719	0.310257	381	307	0.0012732	0.0069294
TCA-GLYOX-BYPASS	pathway	0.963273	0.297492	381	327	0.00130991	0.0069294
PWY-7723	pathway	0.574784	0.178748	381	113	0.00141345	0.00716586
PWY-7345	pathway	0.210744	0.06576	381	381	0.00146641	0.00726537
PWY66-430	pathway	0.965648	0.30101	381	215	0.00145021	0.00726537
PWY-5097	pathway	-0.105048	0.032872	381	381	0.00151206	0.00740741
PWY-6895	pathway	0.463353	0.145376	381	379	0.00155546	0.00753533
PWY-6803	pathway	0.987379	0.310677	381	354	0.00160389	0.00768459
PWY-5088	pathway	0.83716	0.26502	381	187	0.00171098	0.00802138
PWY-5189	pathway	0.831328	0.263053	381	360	0.0017027	0.00802138
PWY0-1296	pathway	0.14885	0.0471727	381	381	0.00173068	0.00802742
PWY-8131	pathway	0.435097	0.138287	381	381	0.00178402	0.00818771
PWY-6385	pathway	-0.0994513	0.0316776	381	381	0.00182513	0.00828912
P185-PWY	pathway	0.572487	0.183716	381	375	0.00197187	0.00864503
PWY-5845	pathway	0.62253	0.199755	381	363	0.00196987	0.00864503
PWY-5862	pathway	0.641291	0.205906	381	363	0.0019828	0.00864503
PWY-6606	pathway	0.300947	0.0966004	381	380	0.00197696	0.00864503
POLYAMSYN-PWY	pathway	0.346602	0.111555	381	381	0.00203233	0.00873945
PWY-7942	pathway	0.868587	0.279721	381	327	0.00204455	0.00873945
PWY-6122	pathway	-0.0882614	0.028591	381	381	0.00217036	0.00892716
PWY-6277	pathway	-0.0882614	0.028591	381	381	0.00217036	0.00892716
PWY-6608	pathway	0.294279	0.0951102	381	381	0.0021207	0.00892716
PWY-7389	pathway	0.85875	0.277846	381	225	0.0021441	0.00892716
PWY-5705	pathway	0.925605	0.300343	381	294	0.00220775	0.00899607
KDO-NAGLIPASYN-PWY	pathway	0.985588	0.320435	381	299	0.00225185	0.00909078
PWY-7209	pathway	0.892542	0.290942	381	313	0.00231165	0.00924661
GLYOXYLATE-BYPASS	pathway	0.883038	0.289797	381	355	0.00247257	0.0097281
PWY66-367	pathway	0.687559	0.225682	381	193	0.00247665	0.0097281
PWY-7221	pathway	-0.118036	0.0387794	381	381	0.00249929	0.00972938
PWY-5675	pathway	0.912743	0.300332	381	346	0.00253737	0.0097902
HCAMHPDEG-PWY	pathway	0.994065	0.329426	381	314	0.00272024	0.0100511
P221-PWY	pathway	1.21836	0.402909	381	308	0.00266529	0.0100511
PWY-5971	pathway	0.529023	0.174947	381	345	0.00266522	0.0100511
PWY-6690	pathway	0.994065	0.329426	381	314	0.00272024	0.0100511
PWY0-1277	pathway	0.895299	0.296593	381	310	0.0027111	0.0100511
P124-PWY	pathway	0.7417	0.246443	381	298	0.00279073	0.0102248
PWY-I9	pathway	0.31598	0.105409	381	381	0.00289991	0.0105364
PWY-7211	pathway	0.398573	0.134053	381	378	0.00313495	0.0112962
DARABCATK12-PWY	pathway	0.998338	0.336555	381	304	0.00320462	0.0114526
GLYCOL-GLYOXDEG-PWY	pathway	0.965471	0.327917	381	313	0.00343681	0.0119624
PWY-5850	pathway	0.798483	0.271179	381	323	0.00343438	0.0119624
PWY-5860	pathway	0.814248	0.276729	381	323	0.00345703	0.0119624
PWY-5896	pathway	0.798483	0.271179	381	323	0.00343438	0.0119624
P105-PWY	pathway	0.824747	0.280825	381	350	0.00351784	0.0119826
PWY-6328	pathway	0.862079	0.293426	381	211	0.00350557	0.0119826
PWY-8086	pathway	0.868725	0.296131	381	256	0.00355445	0.0120135
PEPTIDOGLYCANSYN-PWY	pathway	-0.101572	0.0347042	381	381	0.00363135	0.012086
TCA	pathway	0.755648	0.258036	381	346	0.0036122	0.012086
PWY0-1533	pathway	0.9016	0.30862	381	249	0.00369336	0.0121993
PWY-7385	pathway	0.925799	0.321131	381	314	0.00416454	0.0135661
PWY-7807	pathway	0.881382	0.305764	381	248	0.00416941	0.0135661
PWY-5861	pathway	0.580509	0.202044	381	366	0.0042923	0.0138626
AST-PWY	pathway	0.965959	0.336842	381	310	0.00436594	0.0139967
CARNMET-PWY	pathway	0.9399	0.329033	381	224	0.00451865	0.0141736
P461-PWY	pathway	0.467509	0.163586	381	381	0.00450025	0.0141736
PWY-7384	pathway	0.849715	0.29731	381	236	0.00449837	0.0141736
REDCITCYC	pathway	0.677471	0.237534	381	347	0.00458114	0.014267
PWY-5838	pathway	0.554005	0.194673	381	366	0.00467039	0.0144418
PWY0-1586	pathway	-0.0840485	0.0295748	381	381	0.00472701	0.0145139
PWY-6285	pathway	0.726141	0.257471	381	319	0.00505029	0.0153981
PWY-5897	pathway	0.557441	0.198688	381	366	0.00528108	0.0157709
PWY-5898	pathway	0.557441	0.198688	381	366	0.00528108	0.0157709
PWY-5899	pathway	0.557441	0.198688	381	366	0.00528108	0.0157709
METHGLYUT-PWY	pathway	0.763522	0.272518	381	354	0.00534372	0.0158494
ANAGLYCOLYSIS-PWY	pathway	-0.0726856	0.0259675	381	381	0.00538662	0.0158687
PWY0-781	pathway	0.581195	0.20802	381	366	0.00547154	0.0160107
P4-PWY	pathway	0.58425	0.209601	381	366	0.00558014	0.0162196
FUC-RHAMCAT-PWY	pathway	0.298286	0.107331	381	381	0.00572214	0.0165222
PWY-801	pathway	0.952467	0.343083	381	317	0.00577269	0.0165585
PWY-7039	pathway	0.674882	0.24407	381	97	0.00596849	0.0170082
METSYN-PWY	pathway	0.668066	0.244027	381	370	0.00647936	0.0177184
PWY-5347	pathway	0.66185	0.241478	381	370	0.00641855	0.0177184
PWY-5415	pathway	0.379714	0.138758	381	78	0.00650142	0.0177184
PWY-5837	pathway	0.595927	0.2168	381	366	0.00626859	0.0177184
PWY-6071	pathway	0.729441	0.266561	381	162	0.00650217	0.0177184
PWY-6387	pathway	-0.0938281	0.0342266	381	381	0.00640802	0.0177184
PWY-6700	pathway	-0.101659	0.0371494	381	381	0.00650199	0.0177184
MET-SAM-PWY	pathway	0.655323	0.239803	381	370	0.00657488	0.0177522
PWY0-1221	pathway	0.824074	0.301674	381	246	0.00659601	0.0177522
PWY-7446	pathway	0.907487	0.332833	381	250	0.00669727	0.0179142
HOMOSER-METSYN-PWY	pathway	0.680809	0.250954	381	370	0.00697417	0.0181569
PWY-7873	pathway	0.790422	0.29084	381	186	0.00687498	0.0181569
PWY0-1298	pathway	0.397606	0.146393	381	381	0.00690984	0.0181569
PWY0-166	pathway	0.754812	0.278335	381	345	0.00699486	0.0181569
PWY0-321	pathway	0.716336	0.264153	381	162	0.00699625	0.0181569
P41-PWY	pathway	0.196715	0.0727853	381	381	0.0071878	0.0185437
PWY-5724	pathway	0.243222	0.0901869	381	40	0.00731193	0.0187529
PWY-7805	pathway	0.75251	0.281163	381	214	0.00776437	0.0197969
PWY-7184	pathway	0.460313	0.172278	381	378	0.00786732	0.0199427
PWY-7953	pathway	-0.0862033	0.0323401	381	381	0.00801562	0.0202012
HEXITOLDEGSUPER-PWY	pathway	0.777512	0.293461	381	331	0.00839946	0.0206177
ORNDEG-PWY	pathway	0.674944	0.254701	381	353	0.0083877	0.0206177
PWY-5695	pathway	-0.0707458	0.0266898	381	381	0.00836998	0.0206177
PWY-6396	pathway	0.280786	0.106067	381	35	0.00845352	0.0206177
PWY-702	pathway	0.231689	0.0875356	381	381	0.0084646	0.0206177
PYRIDNUCSYN-PWY	pathway	-0.0836586	0.031566	381	381	0.00837953	0.0206177
PWY-5677	pathway	0.594028	0.224739	381	273	0.00855355	0.0207186
HEME-BIOSYNTHESIS-II	pathway	0.444465	0.168619	381	379	0.00873567	0.0210428
PWY-6545	pathway	0.433924	0.165115	381	378	0.00893745	0.0212936
PWY-821	pathway	0.642459	0.244317	381	356	0.00889647	0.0212936
HISTSYN-PWY	pathway	-0.0949723	0.0362659	381	381	0.00917865	0.0217494
PWY-6151	pathway	-0.10743	0.0412301	381	381	0.00953199	0.0223438
UBISYN-PWY	pathway	0.730339	0.28011	381	187	0.00948541	0.0223438
PWY-6708	pathway	0.73012	0.280586	381	187	0.00962803	0.0224482
PWY-7874	pathway	0.814334	0.313743	381	211	0.00981098	0.0227531
PWY-5180	pathway	0.636135	0.245502	381	71	0.00993451	0.0229177
PWY66-389	pathway	0.828397	0.320804	381	365	0.0101903	0.023384
PWY-6901	pathway	0.122844	0.0483065	381	381	0.011387	0.0259934
PWY0-1241	pathway	0.201012	0.0797549	381	381	0.0121329	0.027409
SULFATE-CYS-PWY	pathway	0.514094	0.203909	381	379	0.0121052	0.027409
GALACTITOLCAT-PWY	pathway	0.790263	0.313988	381	332	0.0122527	0.0275371
PWY-6147	pathway	-0.154441	0.0615872	381	381	0.0125703	0.0280102
PWY-7242	pathway	0.197846	0.0789156	381	381	0.0125917	0.0280102
PWY-6386	pathway	-0.0860287	0.0349984	381	381	0.0144151	0.0319034
CATECHOL-ORTHO-CLEAVAGE-PWY	pathway	0.687878	0.281392	381	144	0.014958	0.0321265
FASYN-INITIAL-PWY	pathway	0.408181	0.166866	381	119	0.0148926	0.0321265
NAD-BIOSYNTHESIS-II	pathway	0.661364	0.270194	381	344	0.0148286	0.0321265
PWY-5265	pathway	0.554264	0.226433	381	139	0.0148259	0.0321265
SO4ASSIM-PWY	pathway	0.574921	0.234966	381	379	0.0148655	0.0321265
TRNA-CHARGING-PWY	pathway	-0.0751794	0.0307093	381	381	0.0148138	0.0321265
PWY-6823	pathway	0.165572	0.0679317	381	381	0.0152552	0.0326042
PROPFERM-PWY	pathway	0.450571	0.185999	381	325	0.0158847	0.0332968
PWY-5692	pathway	0.70033	0.288664	381	244	0.0157277	0.0332968
PWY-8188	pathway	0.450571	0.185999	381	325	0.0158847	0.0332968
PWY-8189	pathway	0.450571	0.185999	381	325	0.0158847	0.0332968
PWY-5345	pathway	0.468544	0.19495	381	379	0.0167228	0.0348859
PWY-5686	pathway	-0.090876	0.0379688	381	381	0.0171769	0.035326
PWY-7790	pathway	-0.090876	0.0379688	381	381	0.0171769	0.035326
PWY-7791	pathway	-0.090876	0.0379688	381	381	0.0171769	0.035326
CENTFERM-PWY	pathway	0.362319	0.151877	381	375	0.0175412	0.0354073
LPSSYN-PWY	pathway	0.69017	0.289264	381	204	0.0175254	0.0354073
PWY-6590	pathway	0.356654	0.14932	381	375	0.017405	0.0354073
PWY0-461	pathway	0.744401	0.311364	381	249	0.0173002	0.0354073
PWY0-41	pathway	0.709158	0.302034	381	267	0.019391	0.0389608
GLUCOSE1PMETAB-PWY	pathway	0.265948	0.113513	381	368	0.0196523	0.0393047
PWY-6876	pathway	0.696281	0.297461	381	204	0.0197631	0.0393457
PWY-1042	pathway	-0.0811953	0.0348624	381	381	0.020383	0.0403954
PWY-6305	pathway	0.222634	0.0961113	381	381	0.0210683	0.0415646
PROTOCATECHUATE-ORTHO-CLEAVAGE-PWY	pathway	0.662674	0.28643	381	199	0.0212262	0.0416876
ASPASN-PWY	pathway	-0.108696	0.0470519	381	381	0.0214178	0.0418752
PWY0-1415	pathway	0.61636	0.267635	381	350	0.0218206	0.0424723
FUCCAT-PWY	pathway	0.277767	0.120879	381	381	0.0221119	0.0428479
PWY-5417	pathway	0.689647	0.301476	381	136	0.0227128	0.0436246
PWY-5431	pathway	0.689647	0.301476	381	136	0.0227128	0.0436246
KETOGLUCONMET-PWY	pathway	0.847775	0.371277	381	327	0.0229593	0.0439046
PWY-5505	pathway	0.20572	0.0902777	381	381	0.023238	0.0440773
PWY-6182	pathway	0.634492	0.278468	381	114	0.0232518	0.0440773
PWY-5514	pathway	0.133173	0.058551	381	28	0.0234953	0.0443461
PWY-6630	pathway	0.200102	0.0882273	381	381	0.0238894	0.0448957
FERMENTATION-PWY	pathway	0.286607	0.127336	381	381	0.0249715	0.0467278
PENTOSE-P-PWY	pathway	0.119093	0.053404	381	381	0.0263303	0.0490599

[truncated: 2 more sheets: Table S11, Table S12]
